# Supplementary material for: Design, synthesis, apoptotic, and antiproliferative effects of 5-chloro-3- (2-methoxyvinyl)-indole-2-carboxamides and pyrido[3,4-b]indol-1-ones as potent EGFRWT/EGFRT790M inhibitors
Source: PubMed Central journal article supplement — J Enzyme Inhib Med Chem. 2023 May 31;38(1):2218602. doi: 10.1080/14756366.2023.2218602 (PMC10234138; doi:10.1080/14756366.2023.2218602), 2023-05-31
Supplement: IENZ_A_2218602_SM2493.pdf [file IENZ_A_2218602_SM2493.pdf]

**Design, synthesis, apoptotic, and antiproliferative effects of 5-chloro-3-(2-methoxyvinyl)-indole-2-carboxamides and pyrido[3,4-b]indol-1-ones as potent EGFR<sup>WT</sup>/EGFR<sup>T790M</sup> inhibitors**

Lamya H. Al-Wahaibi<sup>1\*</sup>, Anber F. Mohammed<sup>2</sup>, Fatema El-Zahraa S. Abdel Rahman<sup>3</sup>, Mostafa H. Abdelrahman<sup>4</sup>, Xuyuan Gu<sup>5</sup>, Laurent Trembleau<sup>5\*</sup>, Bahaa G. M. Youssif<sup>2\*</sup>

<sup>1</sup>Department of Chemistry, College of Sciences, Princess Nourah bint Abdulrahman University, Saudi Arabia; <sup>2</sup>Pharmaceutical Organic Chemistry Department, Faculty of Pharmacy, Assiut University, Assiut 71526, Egypt; <sup>3</sup>Department of Basic Sciences, Faculty of Oral and Dental Medicine, Nahda University, Beni-Suef 62511, Egypt; <sup>4</sup>Pharmaceutical Organic Chemistry Department, Faculty of Pharmacy, Al-Azhar University, Assiut Branch, Assiut 71524, Egypt; <sup>5</sup>School of Natural and Computing Sciences, University of Aberdeen, Meston Building, Aberdeen, AB24 3UE, United Kingdom.

*\*To whom correspondence should be addressed:*

**Bahaa G. M. Youssif**, Ph.D. Pharmaceutical Organic Chemistry Department, Faculty of Pharmacy, Assiut University, Assiut 71526, Egypt.

**Tel.:** (002)-01098294419

**E-mail address:** [bahaa.youssif@pharm.aun.edu.eg](mailto:bahaa.youssif@pharm.aun.edu.eg), [bgyoussif@ju.edu.sa](mailto:bgyoussif@ju.edu.sa)

**Lamya H. Al-Wahaibi:** Department of Chemistry, College of Sciences, Princess Nourah bint Abdulrahman University [lhalwahaibi@pnu.edu.sa](mailto:lhalwahaibi@pnu.edu.sa)

**Laurent Trembleau**, Ph.D. University of Aberdeen, Chemistry Department, The SyMBioSIS Group, Meston Building, Meston Walk, Aberdeen, AB24 3UE, United Kingdom.

**Tel.:** +44-(0)12242922

**E-mail address:** [l.trembleau@abdn.ac.uk](mailto:l.trembleau@abdn.ac.uk)

# <sup>1</sup>H NMR spectrum of (1)

Mar28-2023-78a pure.10.fid

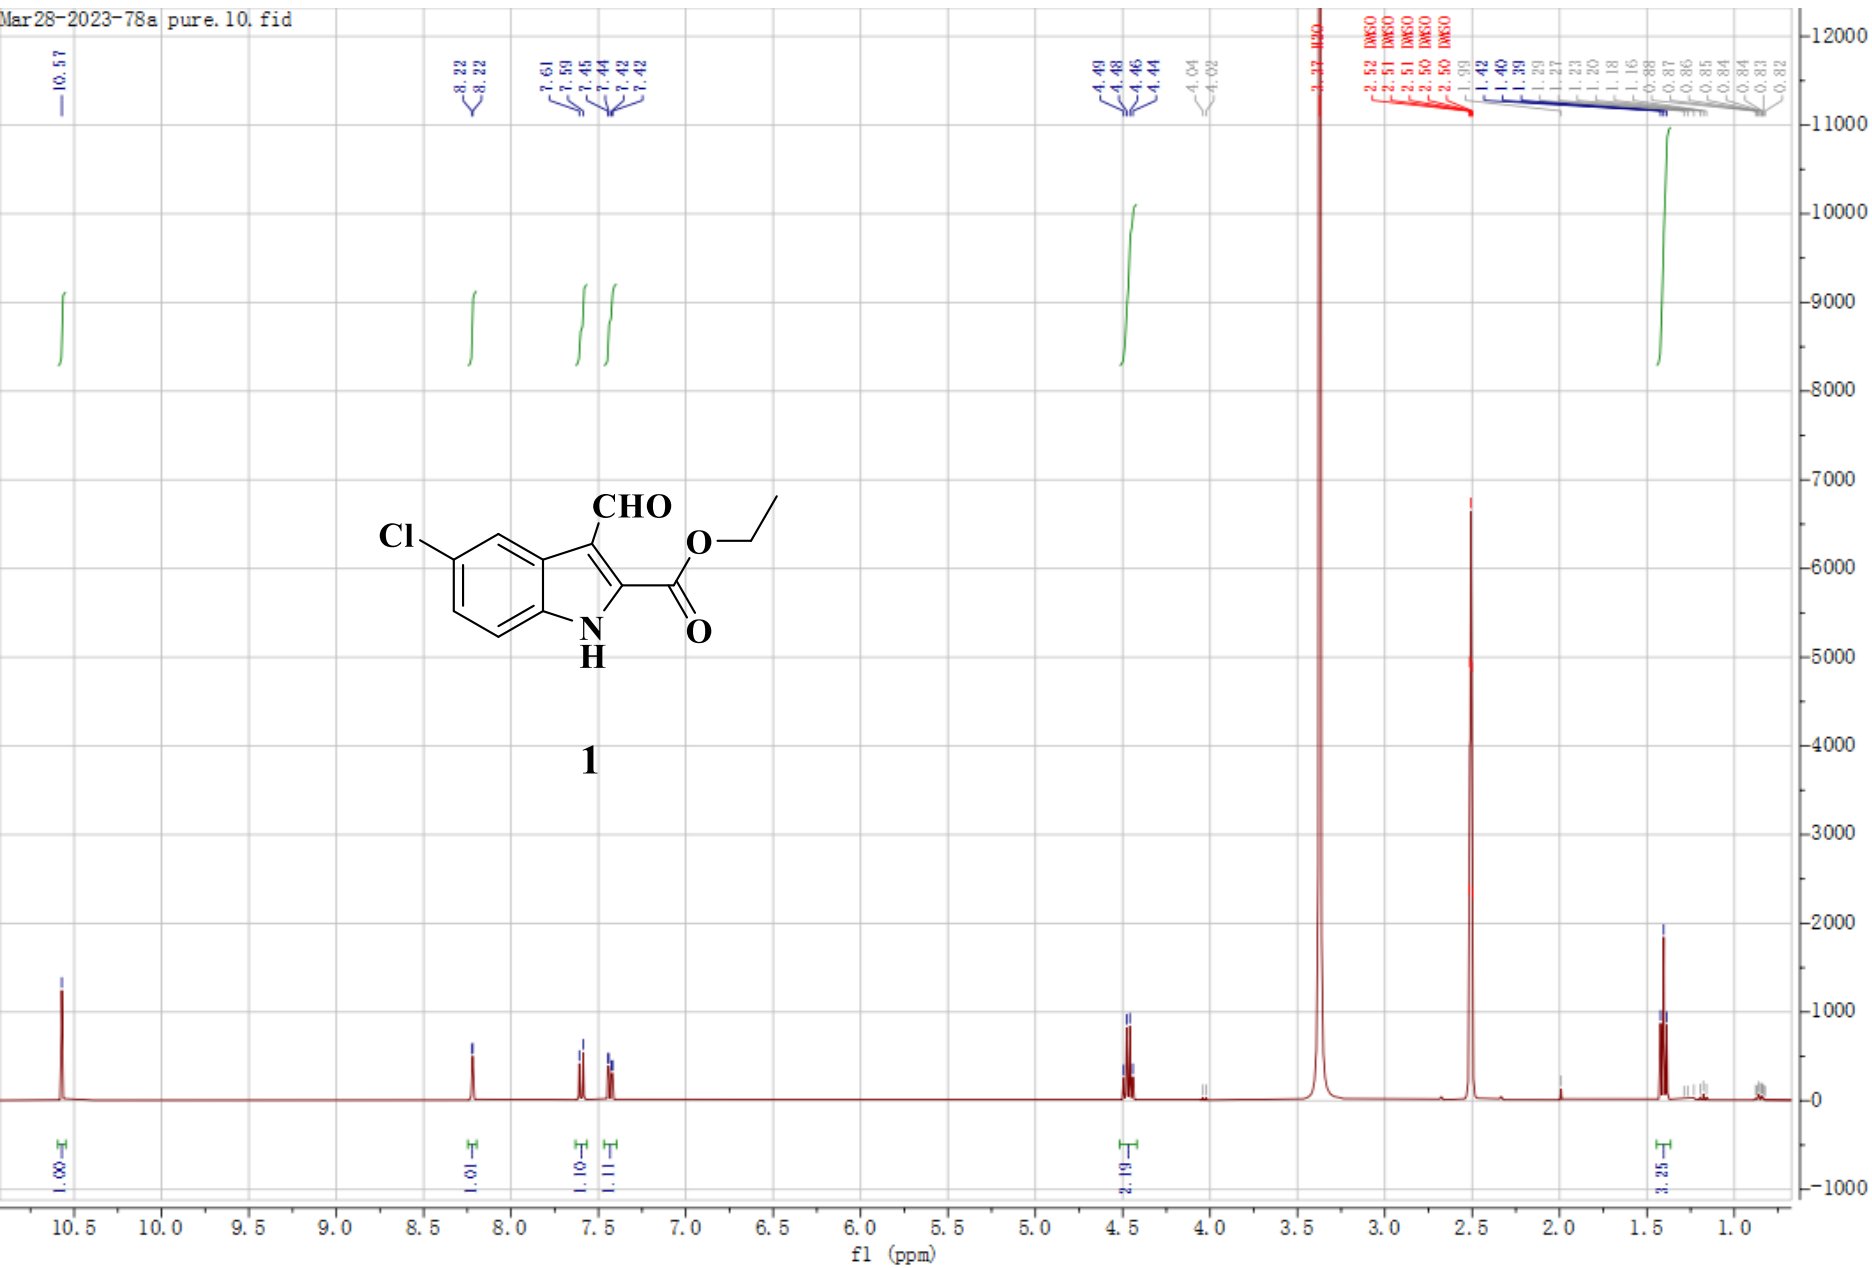

# $^{13}\text{C}$ NMR spectrum of (1)

Apr03-2023-LT78A.10.fid

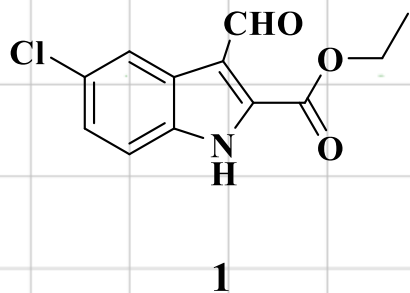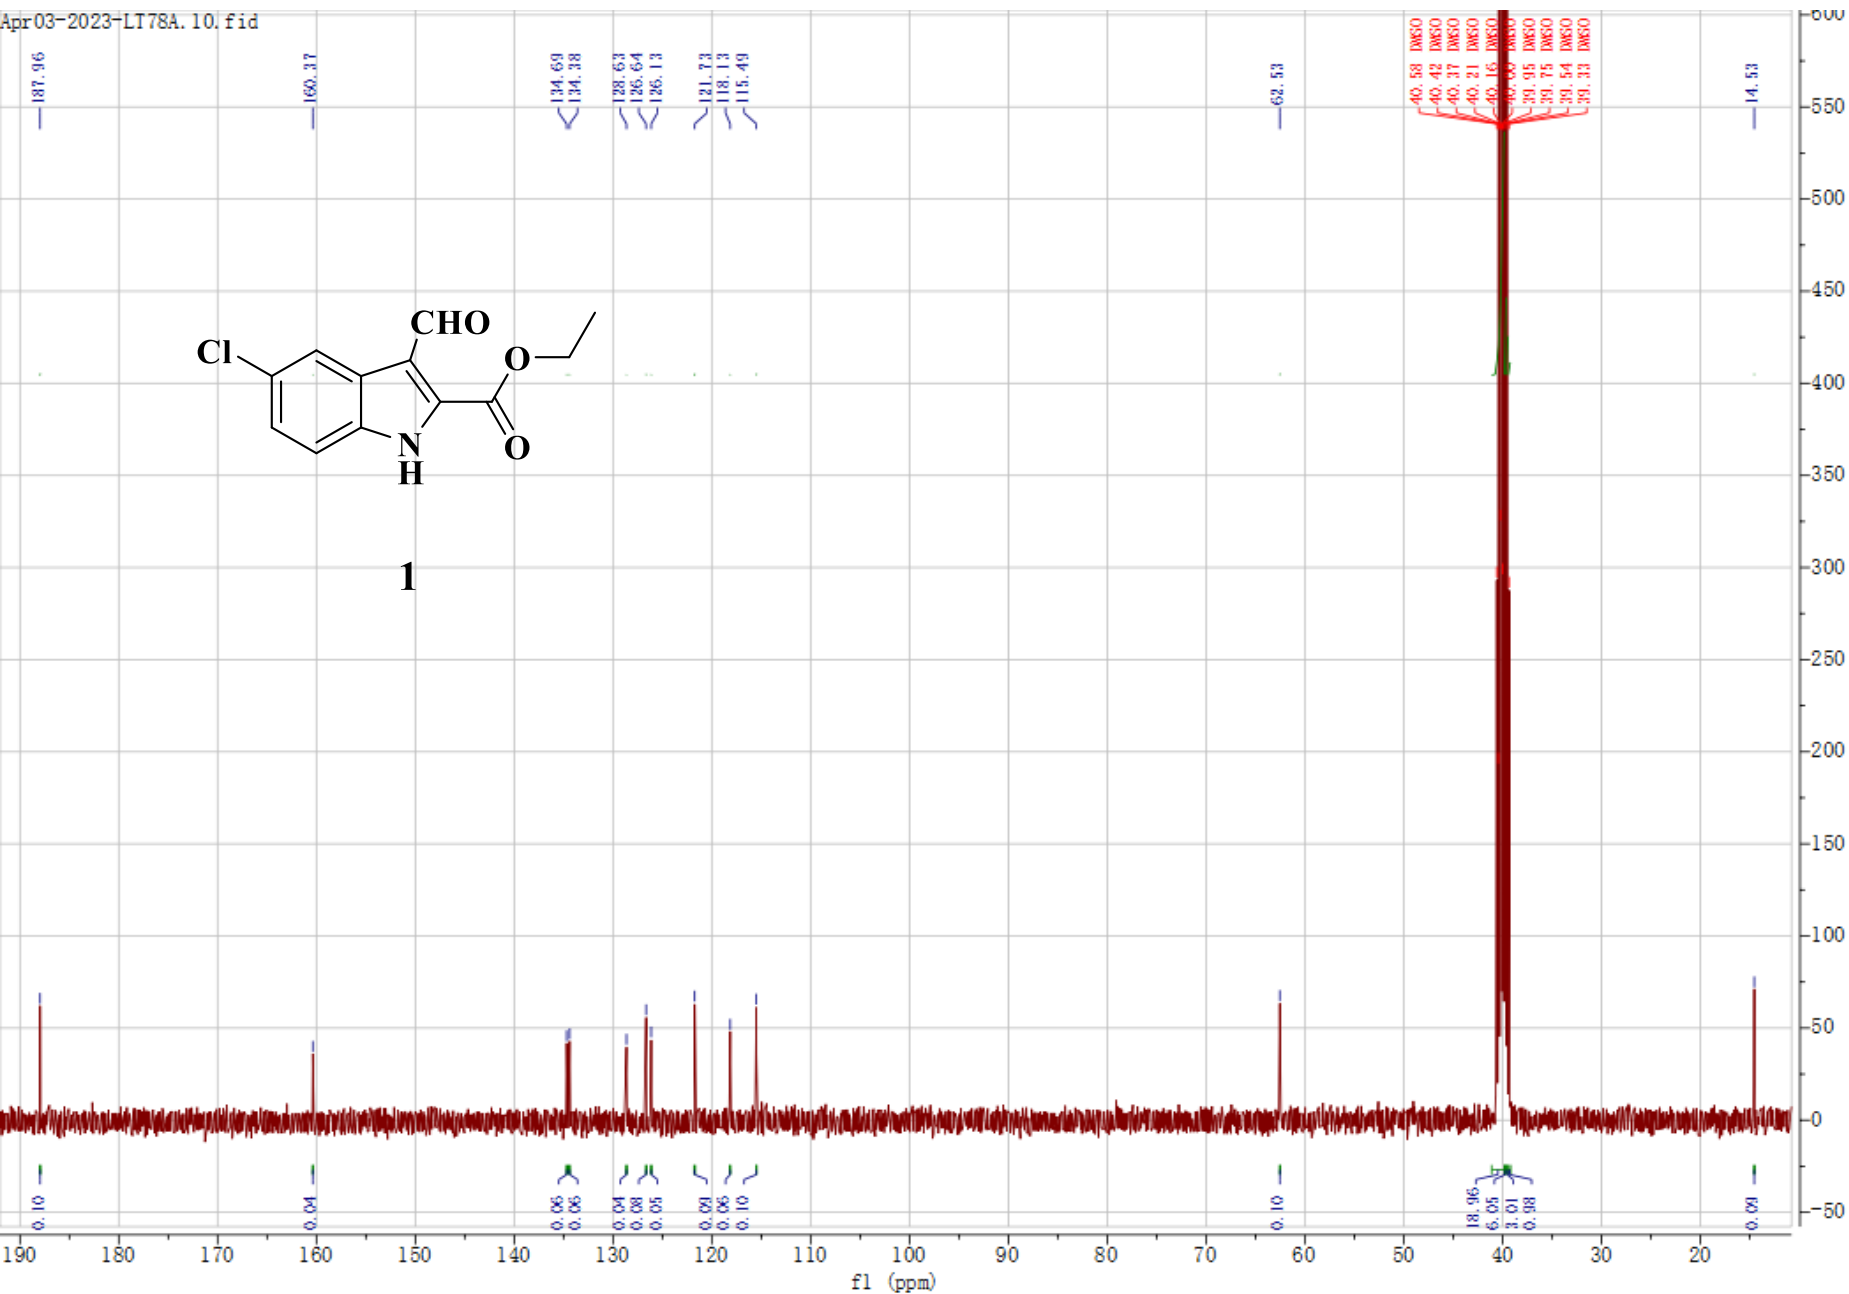

# <sup>1</sup>H NMR spectrum of (2)

Apr03-2023-134\_PURE.10.fid

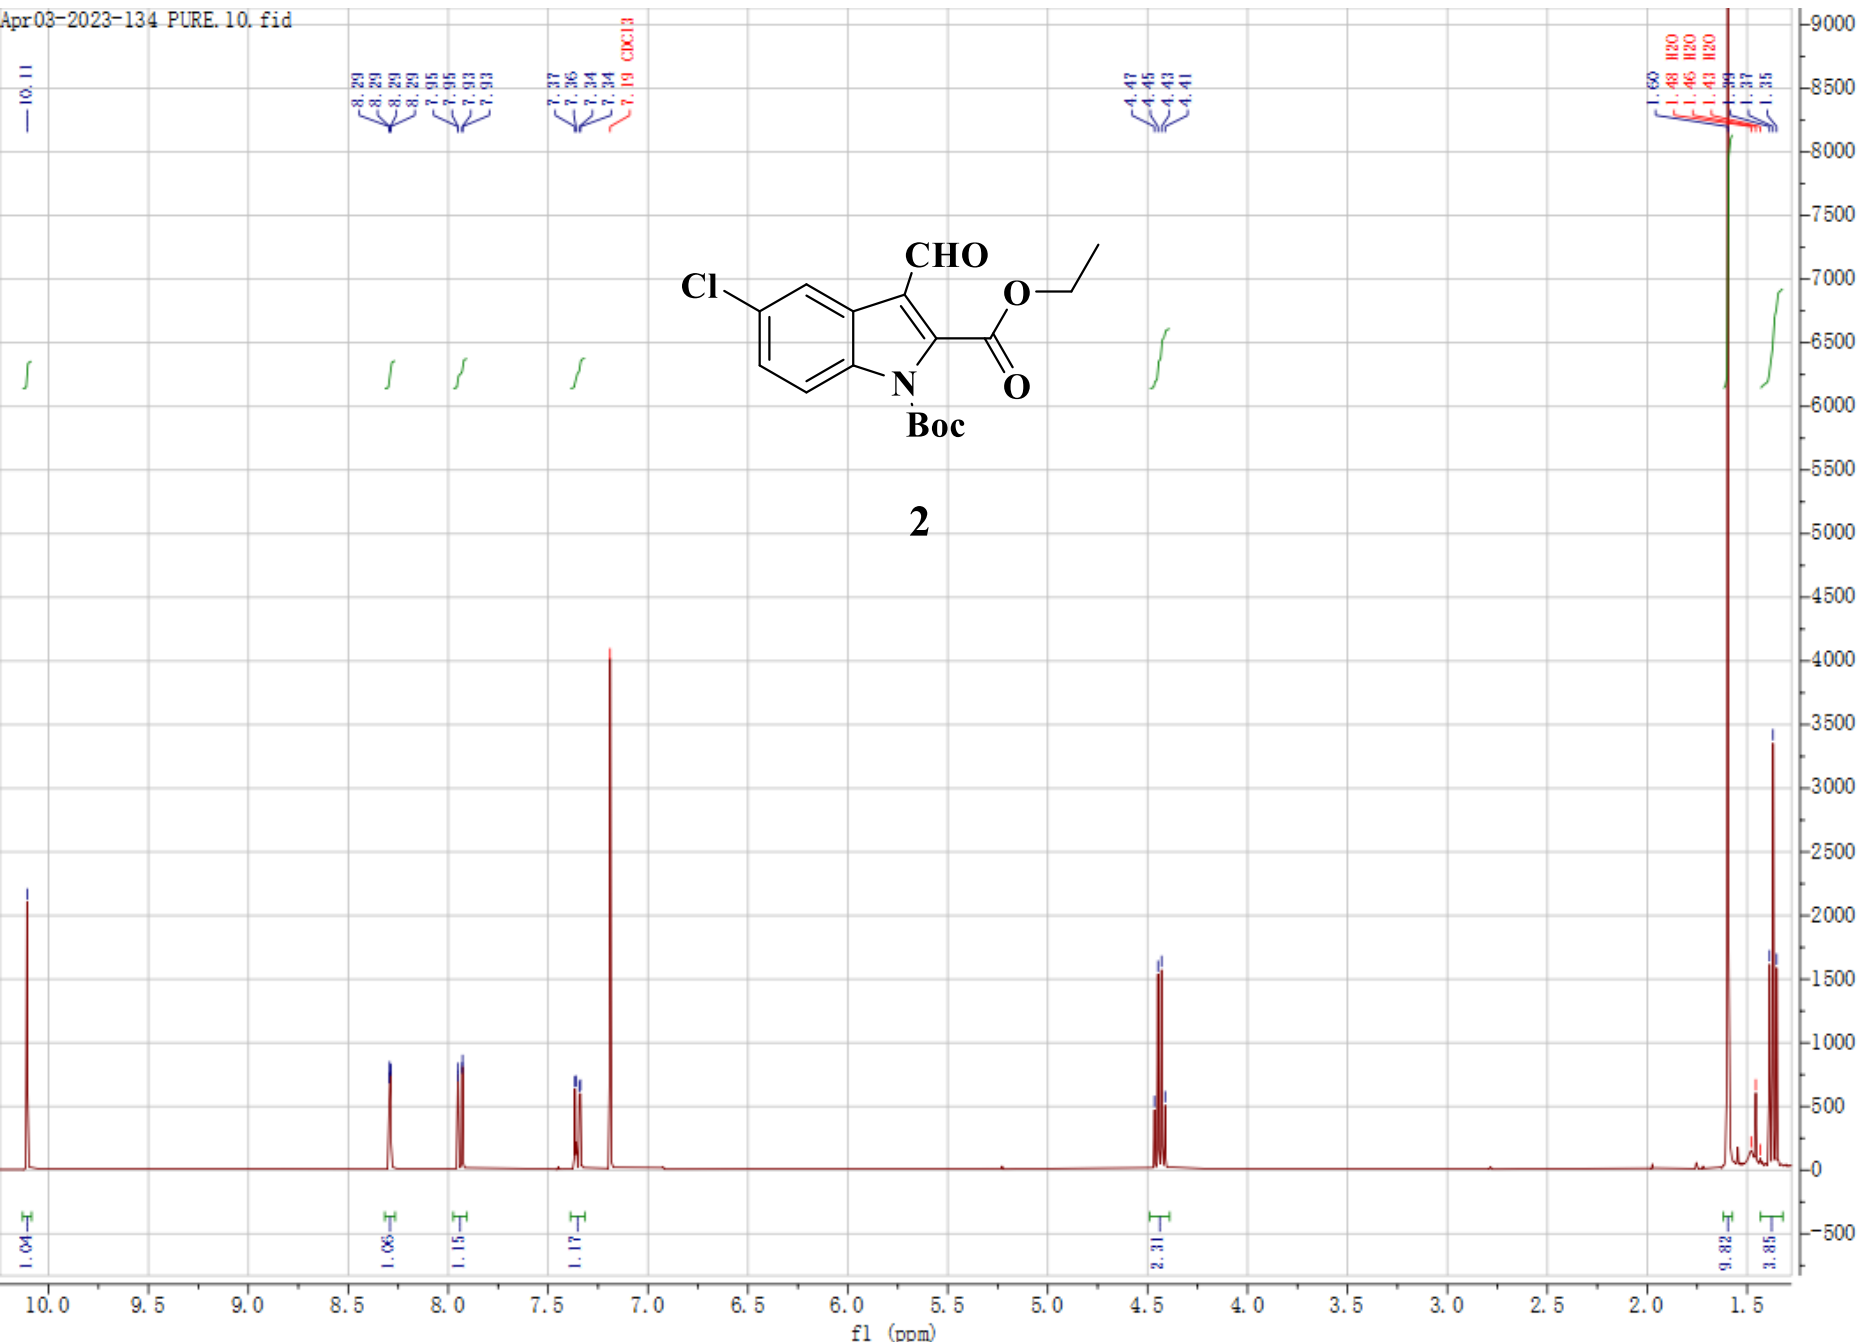

# $^{13}\text{C}$ NMR spectrum of (2)

Apr03-2023-LT134.10.fid

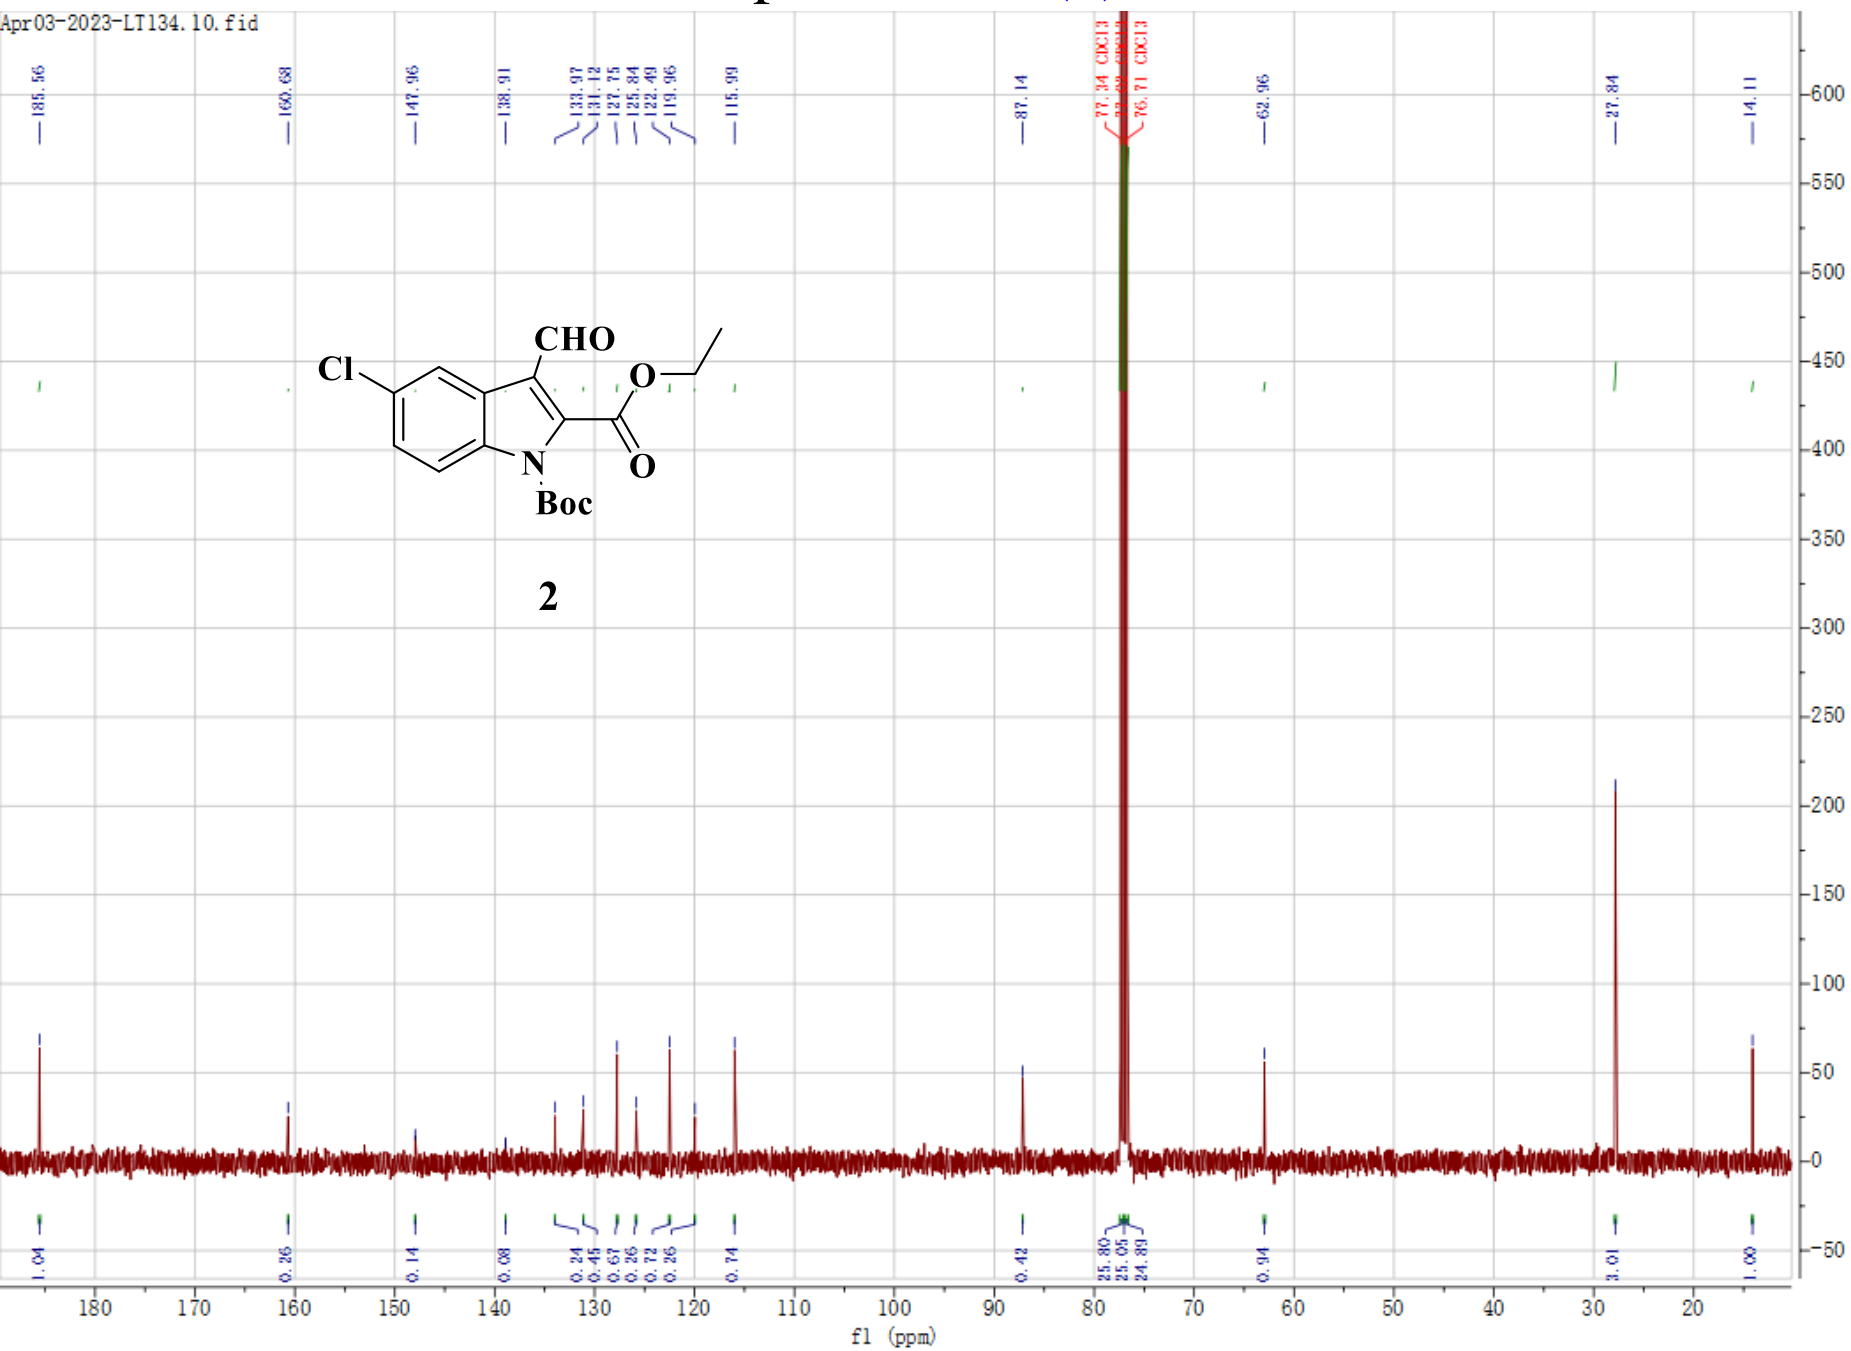

# $^1\text{H}$ NMR spectrum of (3)

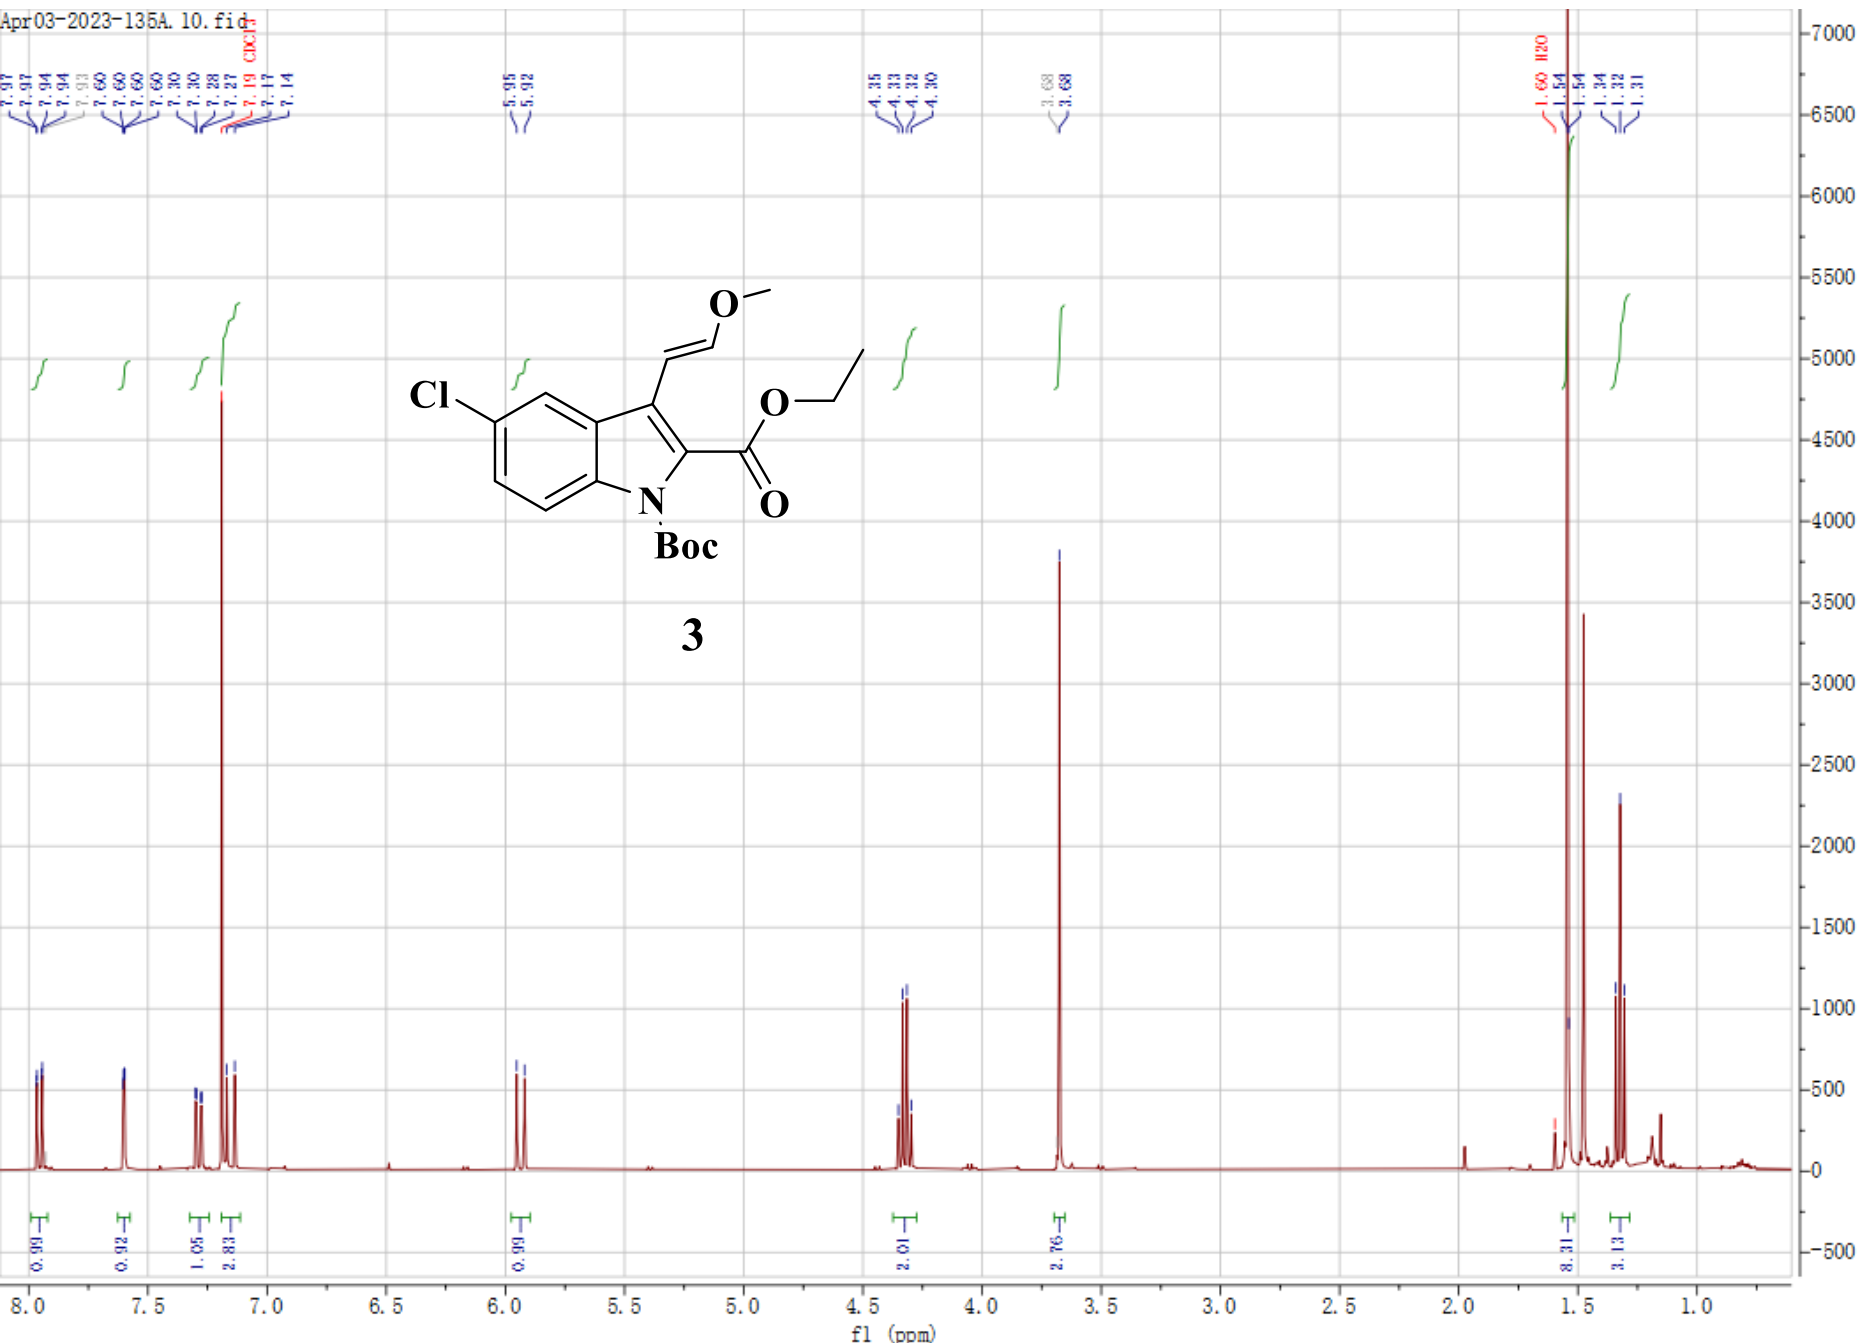

# <sup>13</sup>C NMR spectrum of (3)

Apr05-2023-135A\_10.fid

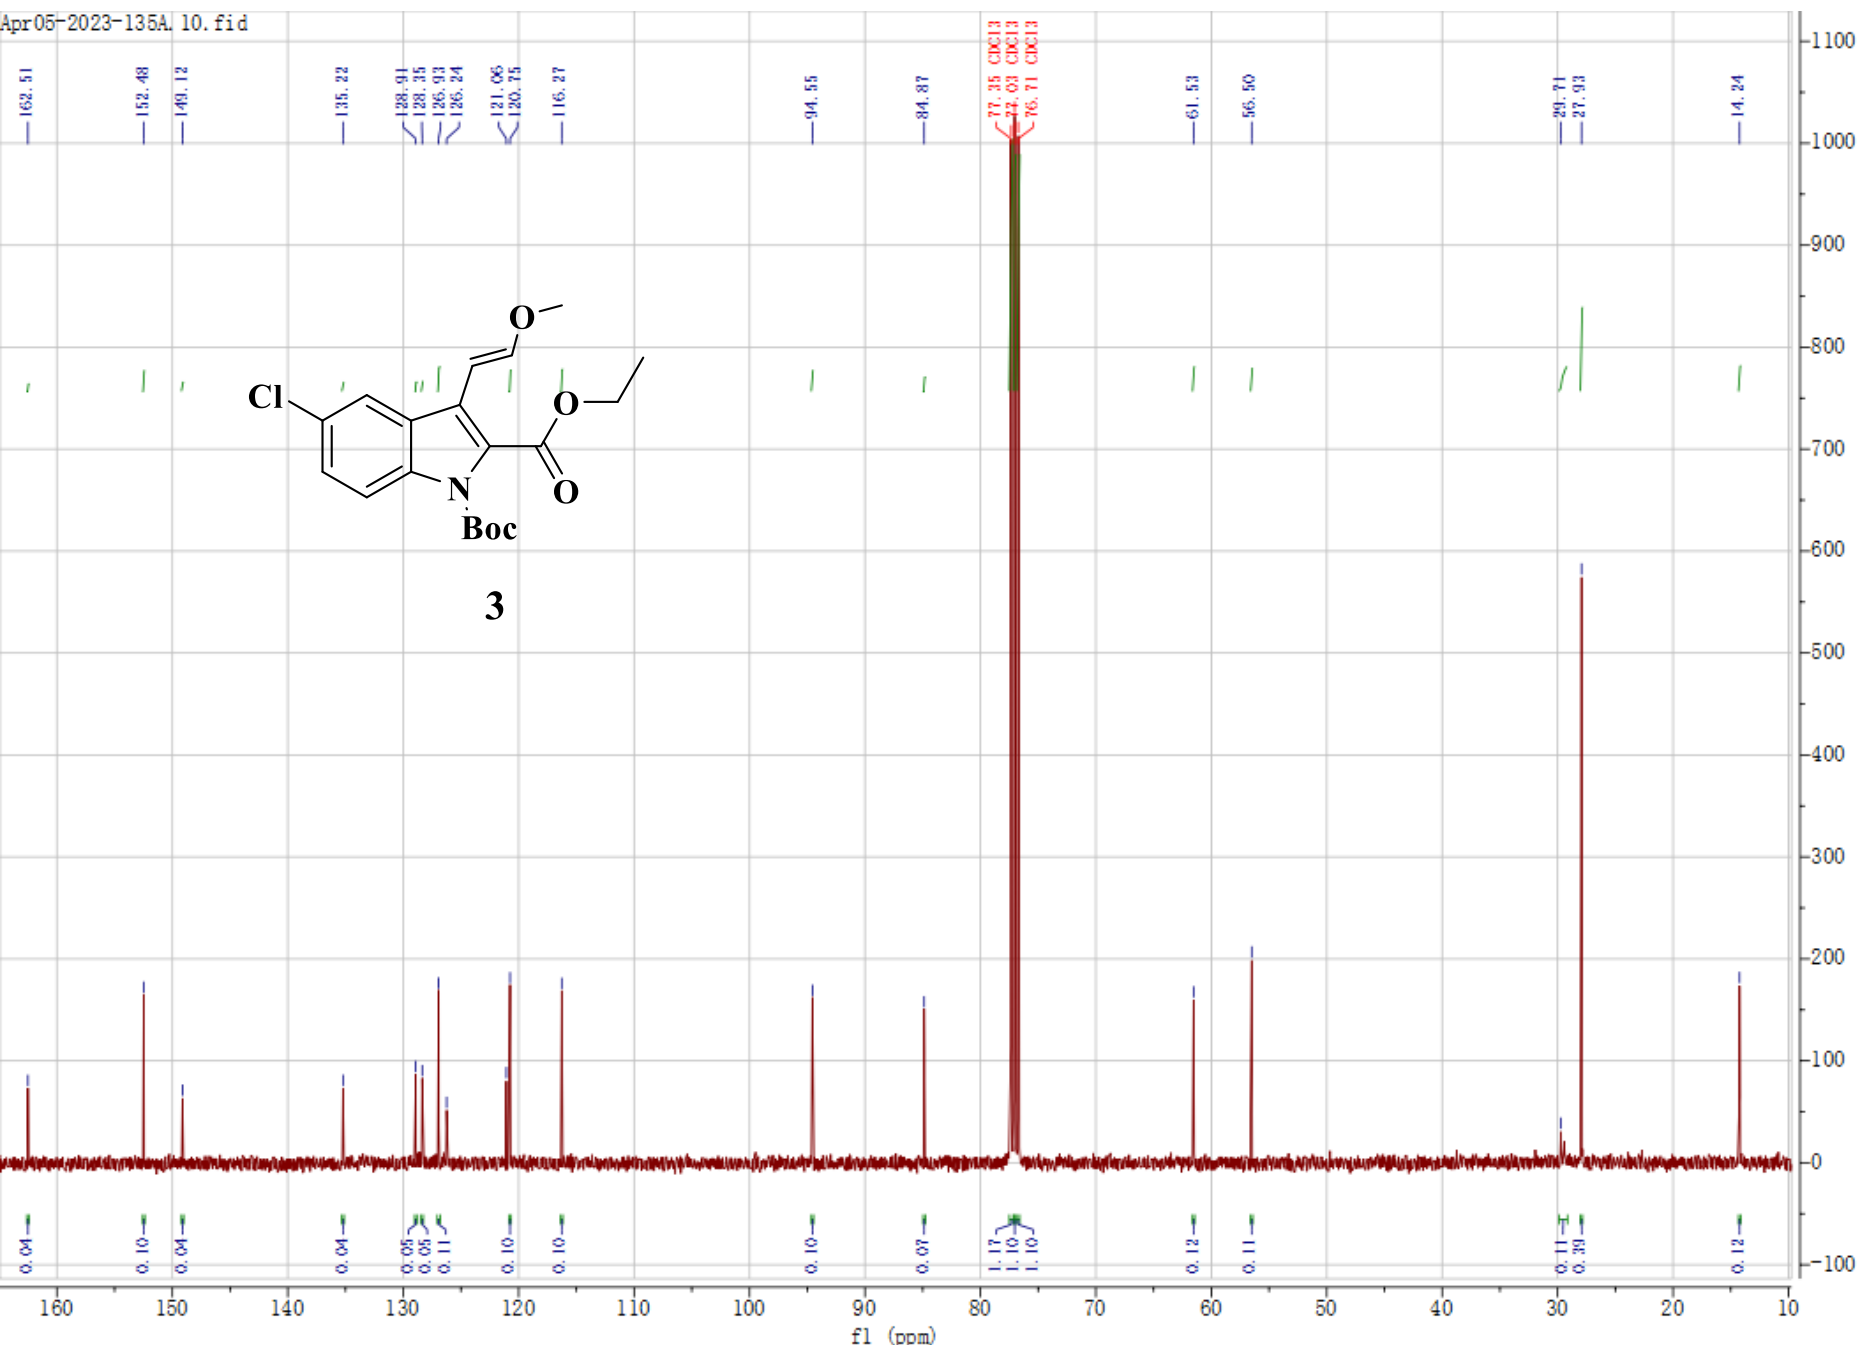

# <sup>1</sup>H NMR spectrum of (4)

Apr04-2023-137 PURE.10. fid

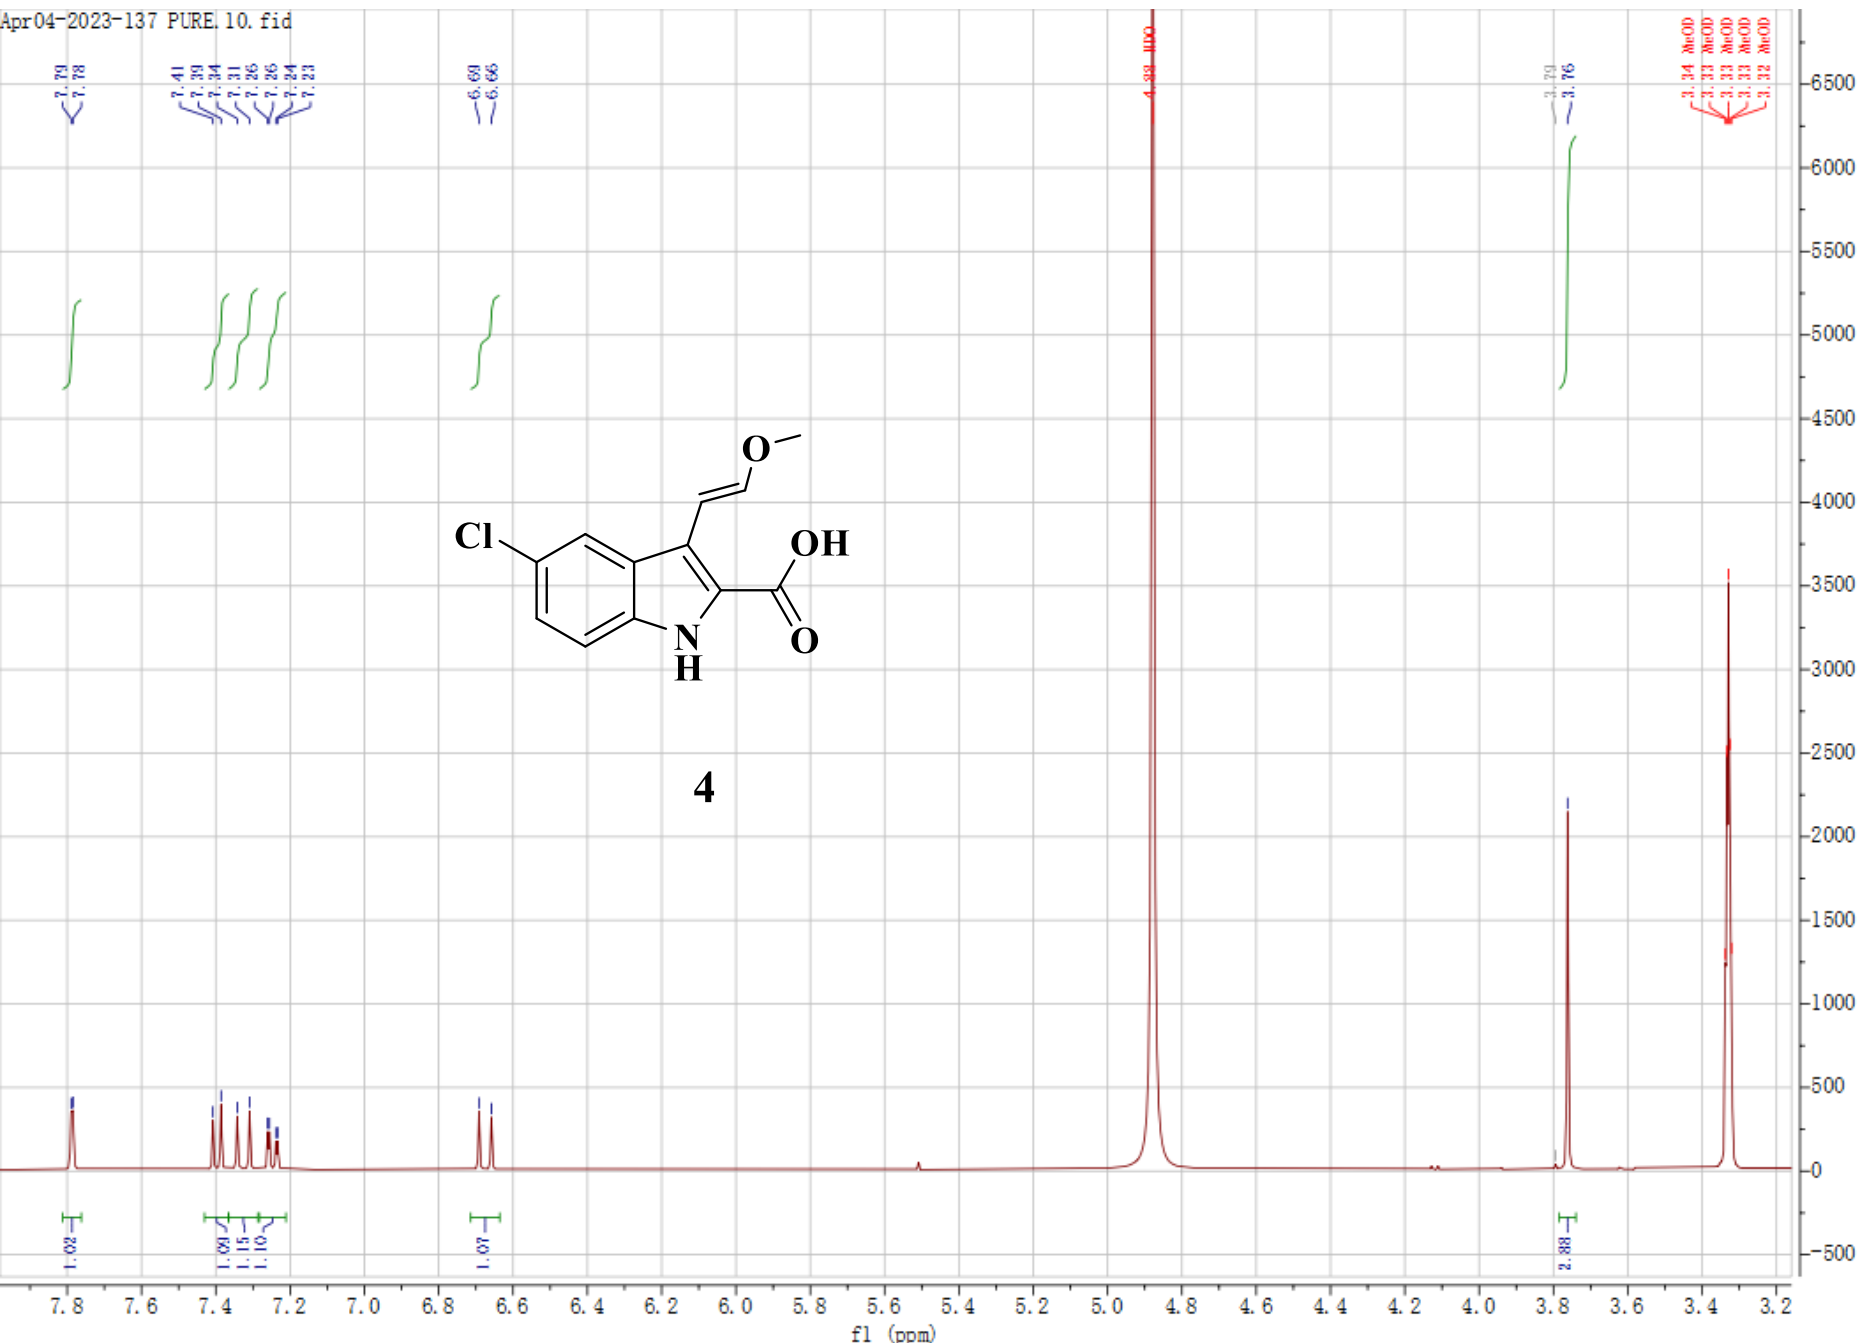



# $^{13}\text{C}$ NMR spectrum of (4)

Apr 05-2023-137.10.fid

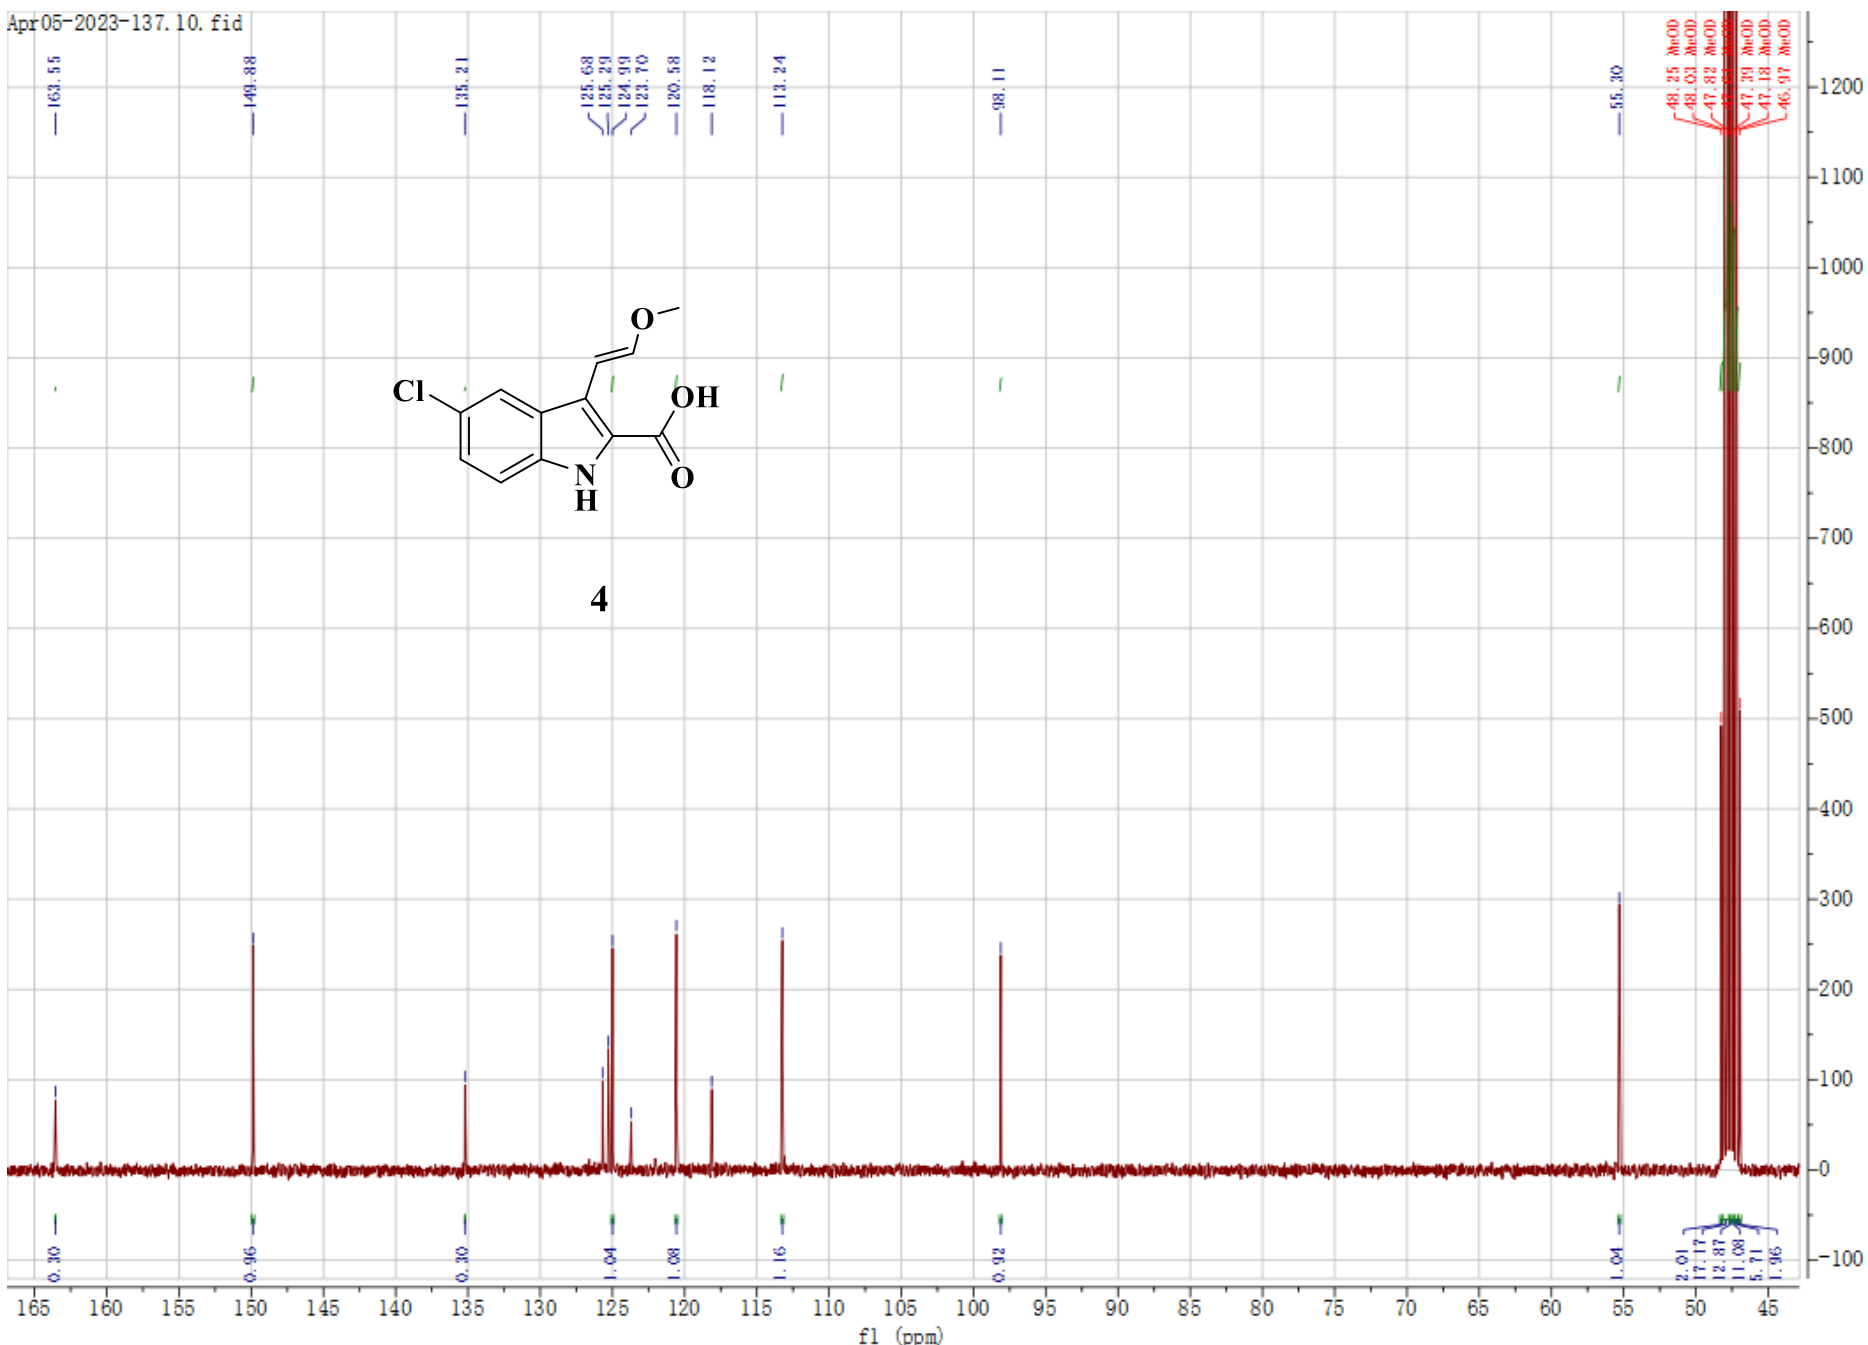

# $^1\text{H}$ NMR spectrum of **6a**

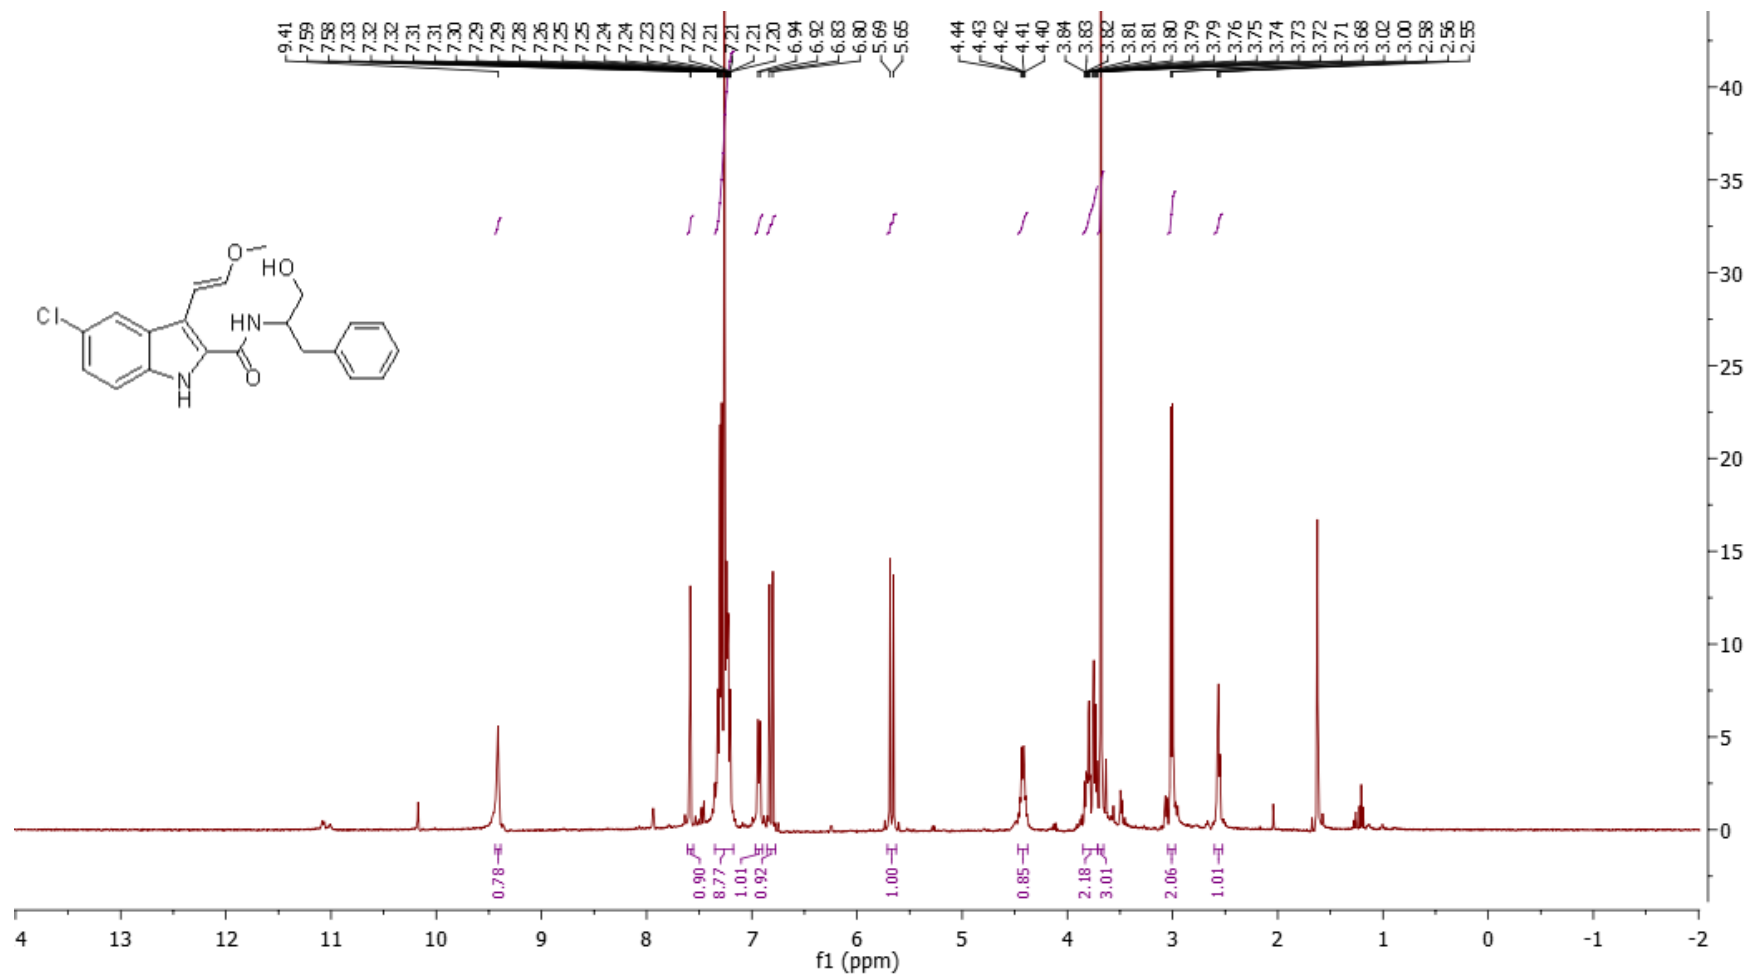

$^1\text{H}$  NMR (400 MHz, Chloroform-*d*)  $\delta$  9.41 (s, 1H), 7.58 (s, 1H), 7.35 – 7.18 (m, 7H), 6.93 (d,  $J = 7.8$  Hz, 1H), 6.82 (d,  $J = 13.0$  Hz, 1H), 5.67 (d,  $J = 13.0$  Hz, 1H), 4.44 - 4.40 (m, 1H), 3.86 – 3.71 (m, 2H), 3.68 (s, 3H), 3.01 (d,  $J = 7.1$  Hz, 2H), 2.56 (t,  $J = 5.3$  Hz, 1H).

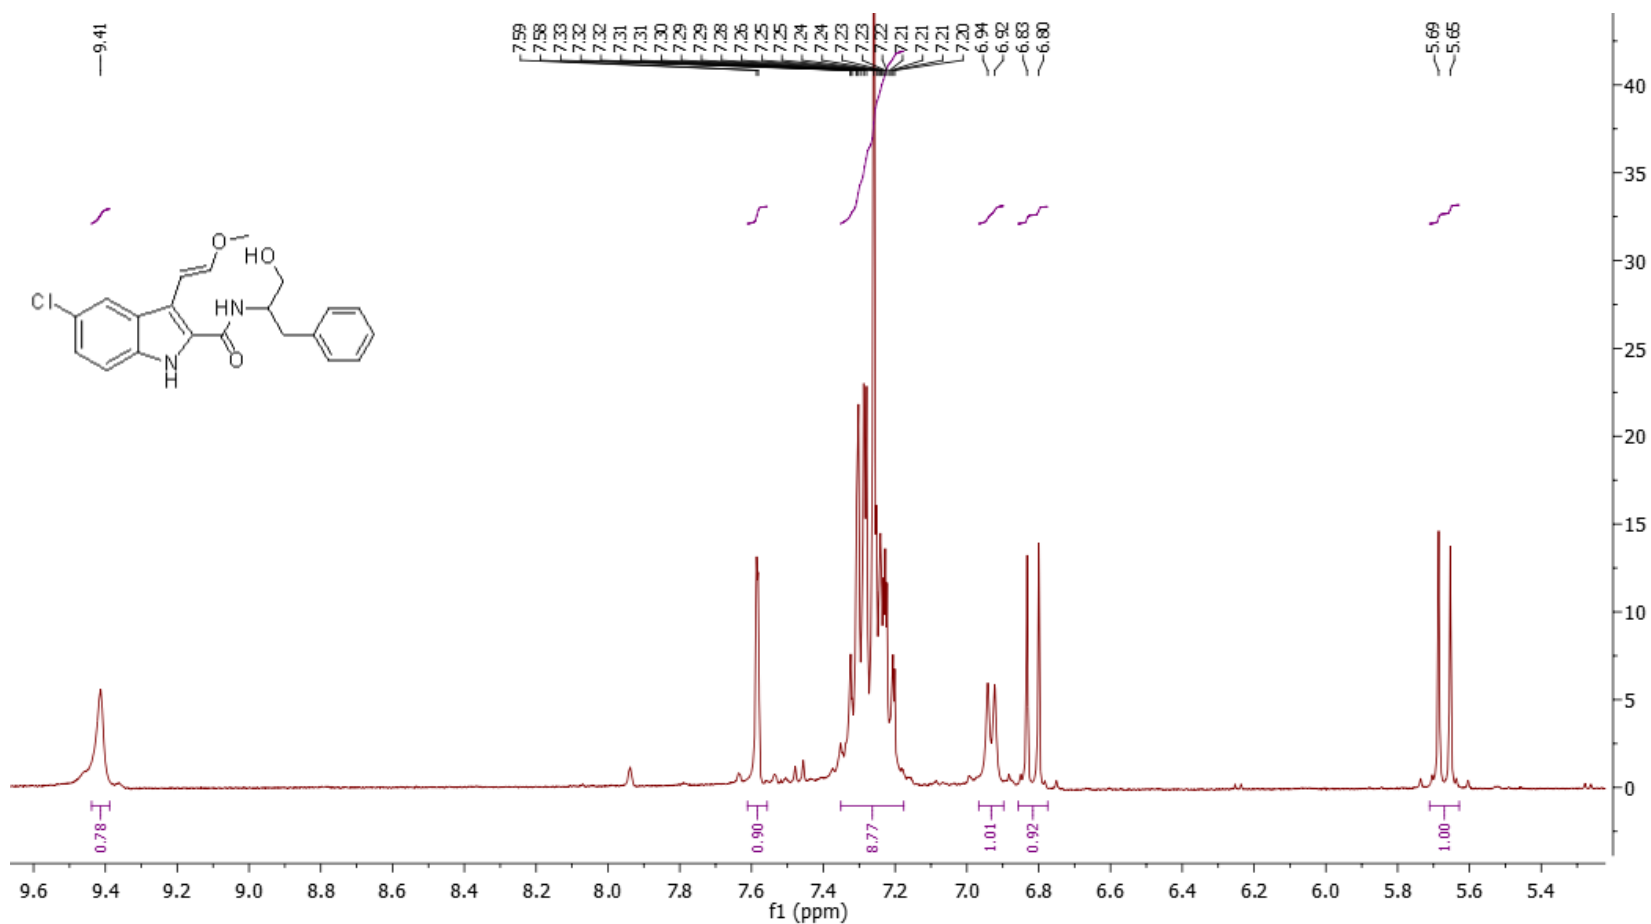

<sup>1</sup>H NMR (400 MHz, Chloroform-*d*) δ 9.41 (s, 1H), 7.58 (s, 1H), 7.35 – 7.18 (m, 7H), 6.93 (d, *J* = 7.8 Hz, 1H), 6.82 (d, *J* = 13.0 Hz, 1H), 5.67 (d, *J* = 13.0 Hz, 1H), 4.44 - 4.40 (m, 1H), 3.86 – 3.71 (m, 2H), 3.68 (s, 3H), 3.01 (d, *J* = 7.1 Hz, 2H), 2.56 (t, *J* = 5.3 Hz, 1H).

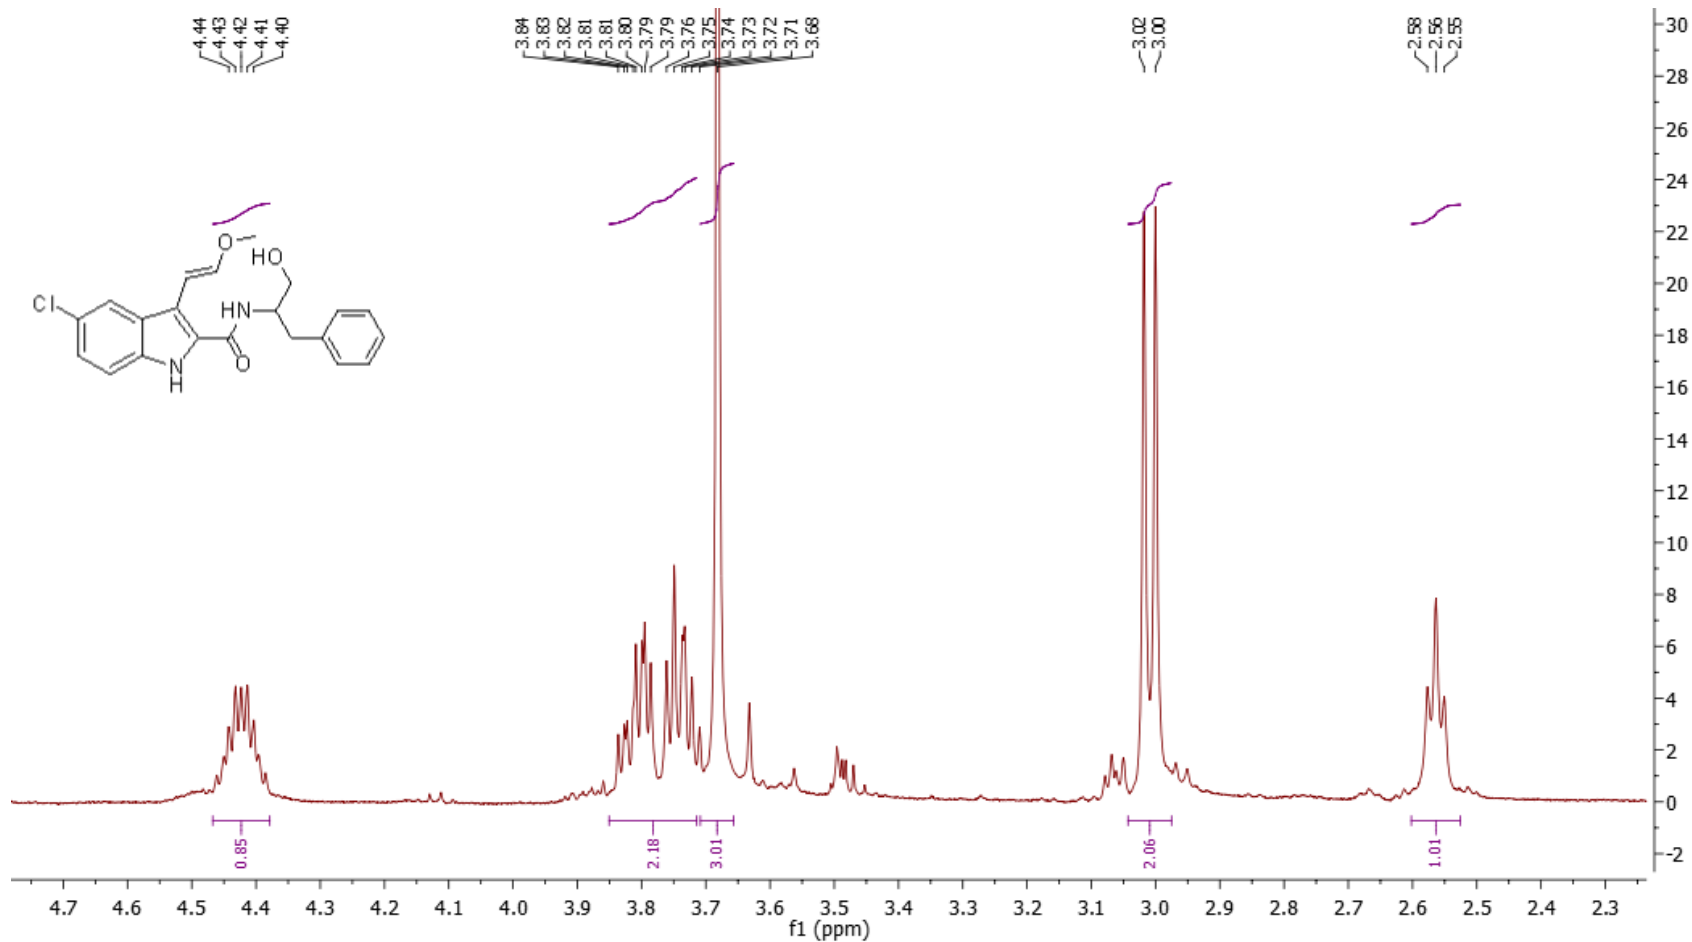

<sup>1</sup>H NMR (400 MHz, Chloroform-*d*)  $\delta$  9.41 (s, 1H), 7.58 (s, 1H), 7.35 – 7.18 (m, 7H), 6.93 (d,  $J = 7.8$  Hz, 1H), 6.82 (d,  $J = 13.0$  Hz, 1H), 5.67 (d,  $J = 13.0$  Hz, 1H), 4.44 - 4.40 (m, 1H), 3.86 – 3.71 (m, 2H), 3.68 (s, 3H), 3.01 (d,  $J = 7.1$  Hz, 2H), 2.56 (t,  $J = 5.3$  Hz, 1H).

# $^{13}\text{C}$ NMR spectrum of **6a**

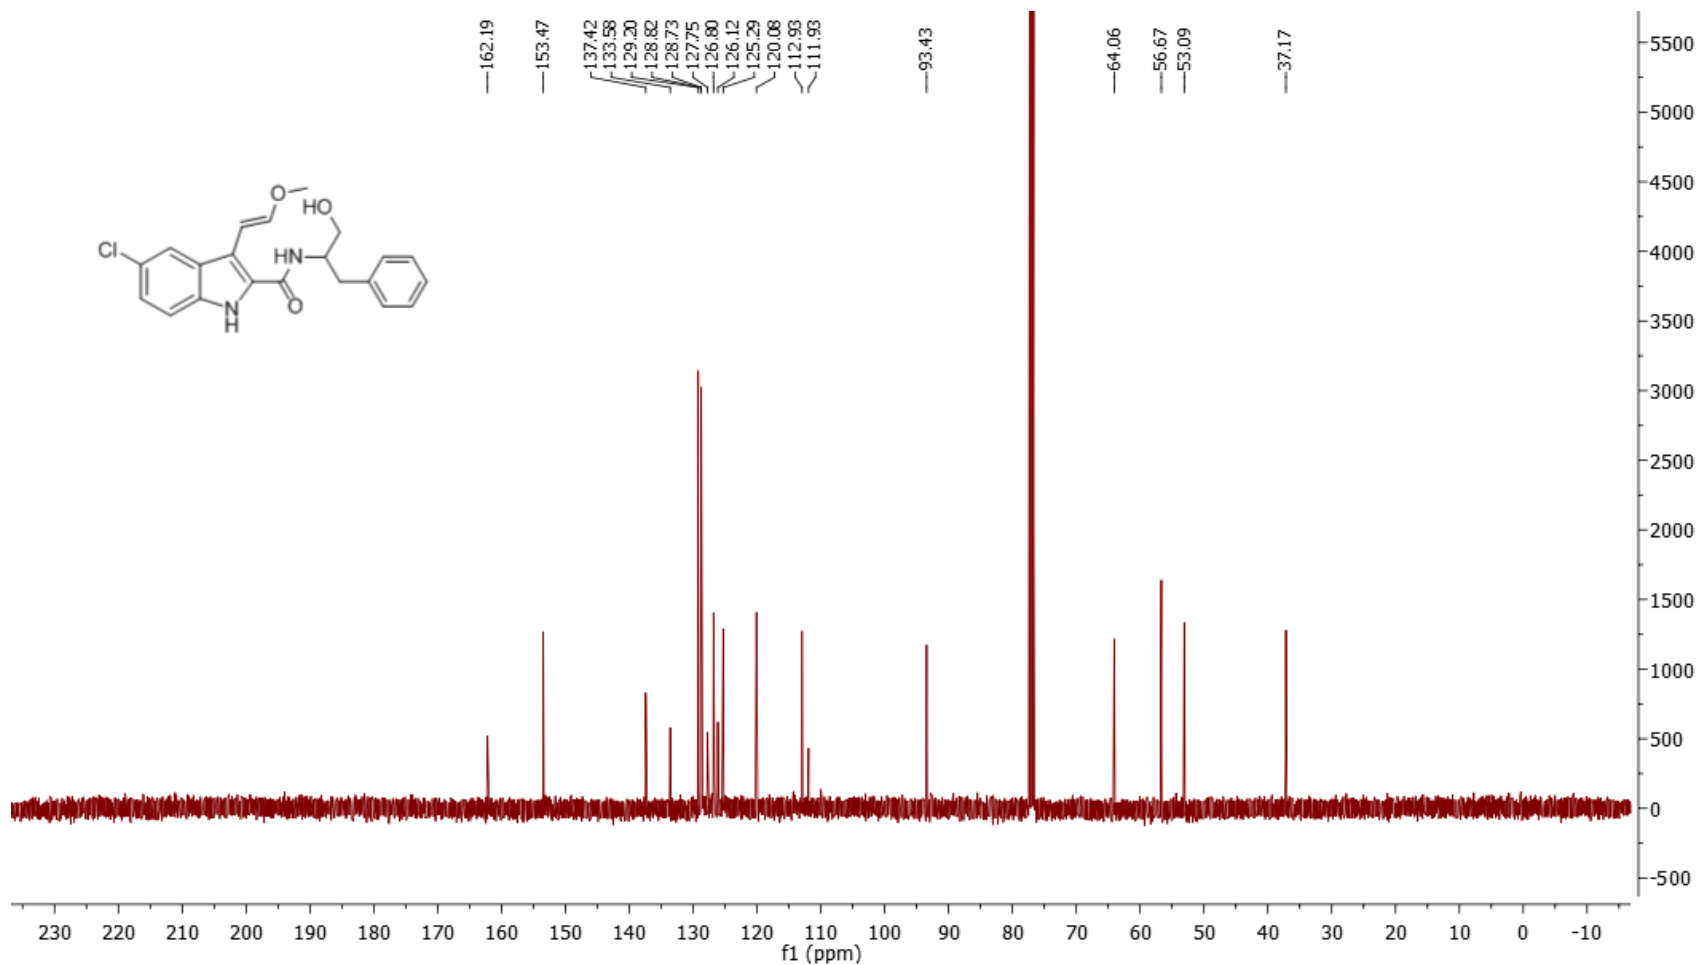

$^{13}\text{C}$  NMR (101 MHz,  $\text{cdCl}_3$ )  $\delta$  162.19, 153.47, 137.42, 133.58, 129.20, 128.82, 128.73, 127.75, 126.80, 126.12, 125.29, 120.08, 112.93, 111.93, 93.43, 64.06, 56.67, 53.09, 37.17.

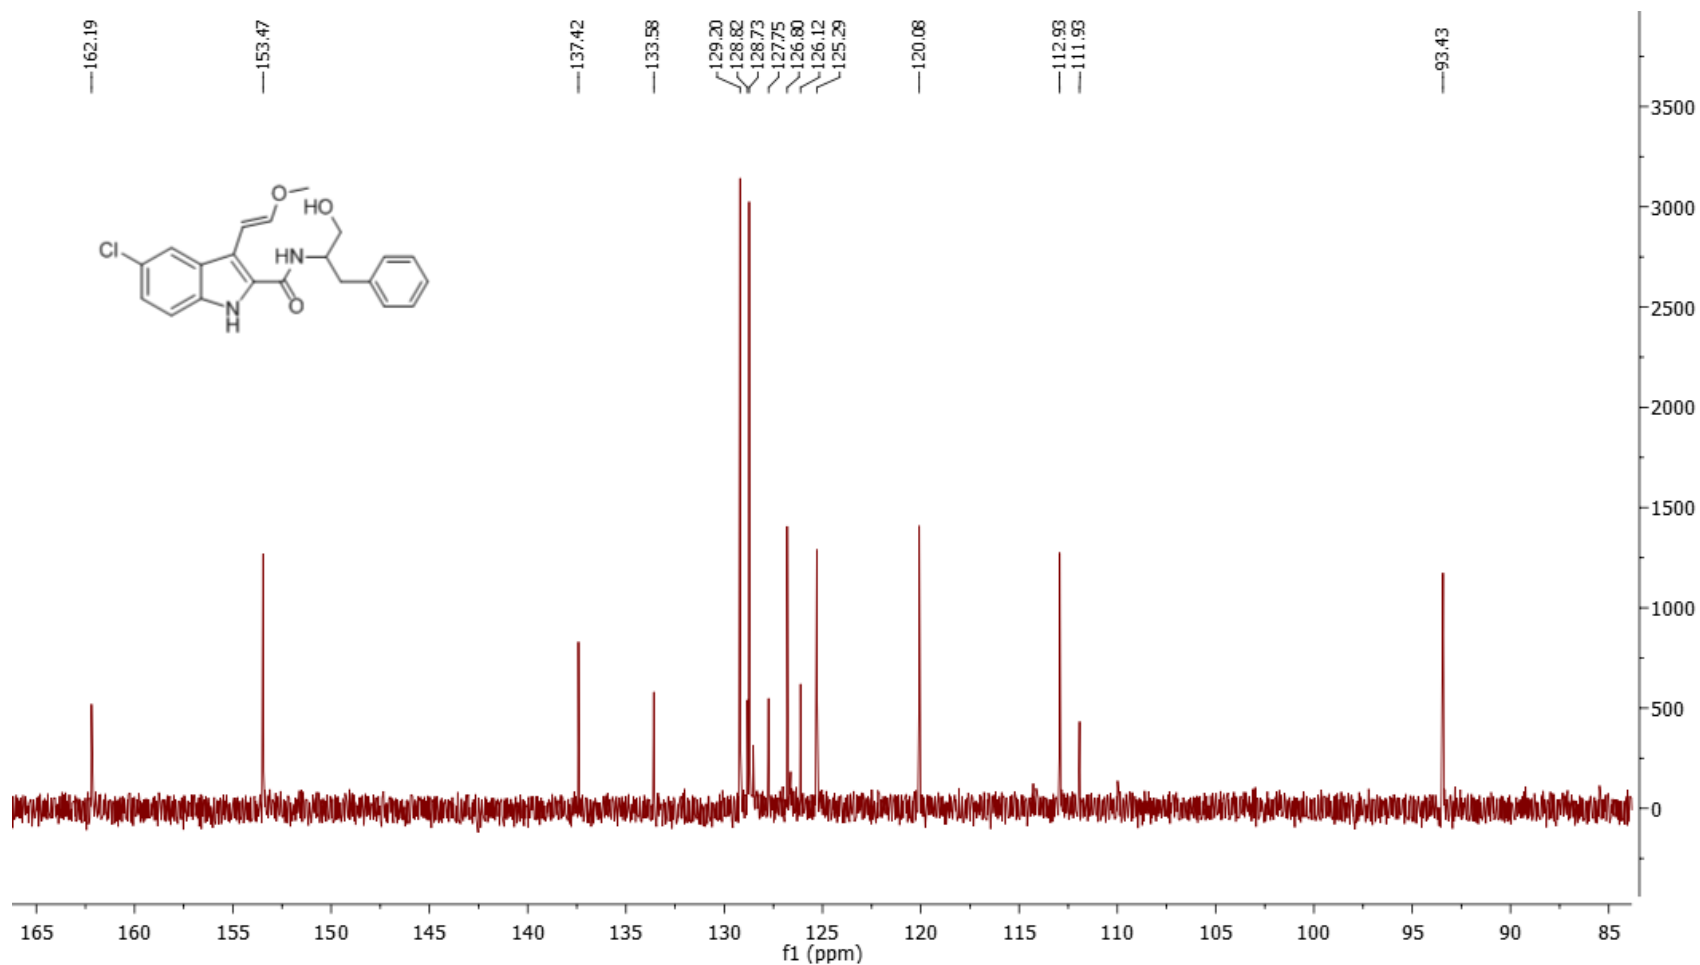

$^{13}\text{C}$  NMR (101 MHz,  $\text{CDCl}_3$ )  $\delta$  162.19, 153.47, 137.42, 133.58, 129.20, 128.82, 128.73, 127.75, 126.80, 126.12, 125.29, 120.08, 112.93, 111.93, 93.43, 64.06, 56.67, 53.09, 37.17.

# $^1\text{H}$ NMR spectrum of **6b**

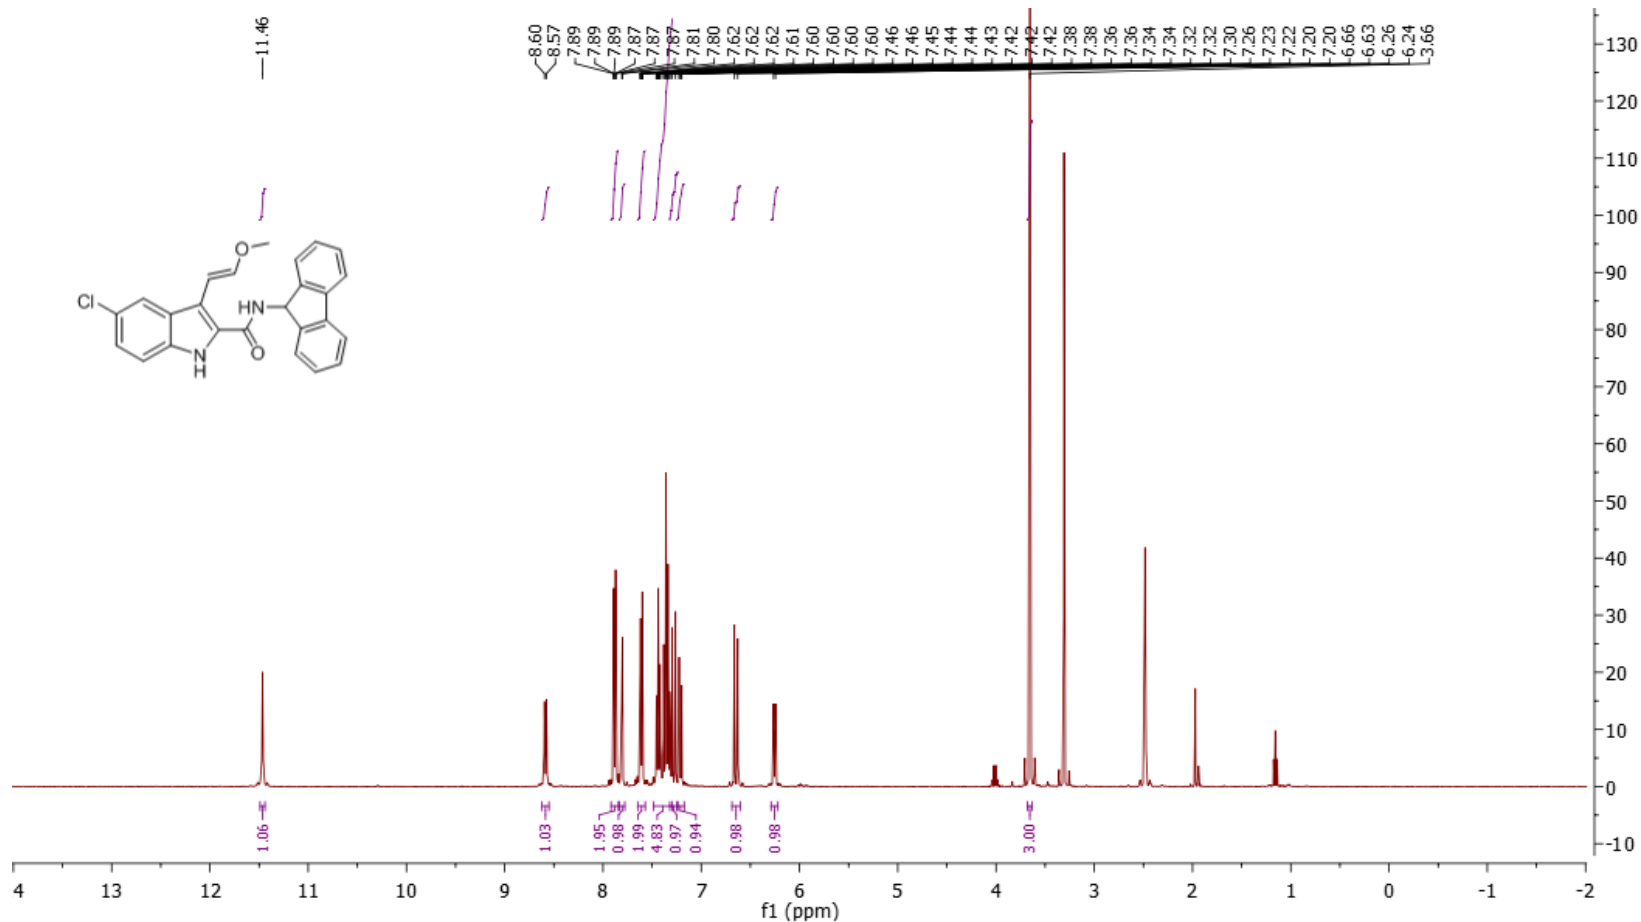

$^1\text{H}$  NMR (400 MHz,  $\text{DMSO-}d_6$ )  $\delta$  11.46 (s, 1H), 8.59 (d,  $J = 8.2$  Hz, 1H), 7.88 (d,  $J = 7.6$  Hz, 2H), 7.81 (d,  $J = 2.0$  Hz, 1H), 7.61 (q,  $J = 7.5$  Hz, 2H), 7.48 – 7.32 (m, 5H), 7.28 (d,  $J = 13.3$  Hz, 1H), 7.21 (dd,  $J = 8.7, 2.0$  Hz, 1H), 6.65 (d,  $J = 13.3$  Hz, 1H), 6.25 (d,  $J = 8.1$  Hz, 1H), 3.66 (s, 3H).

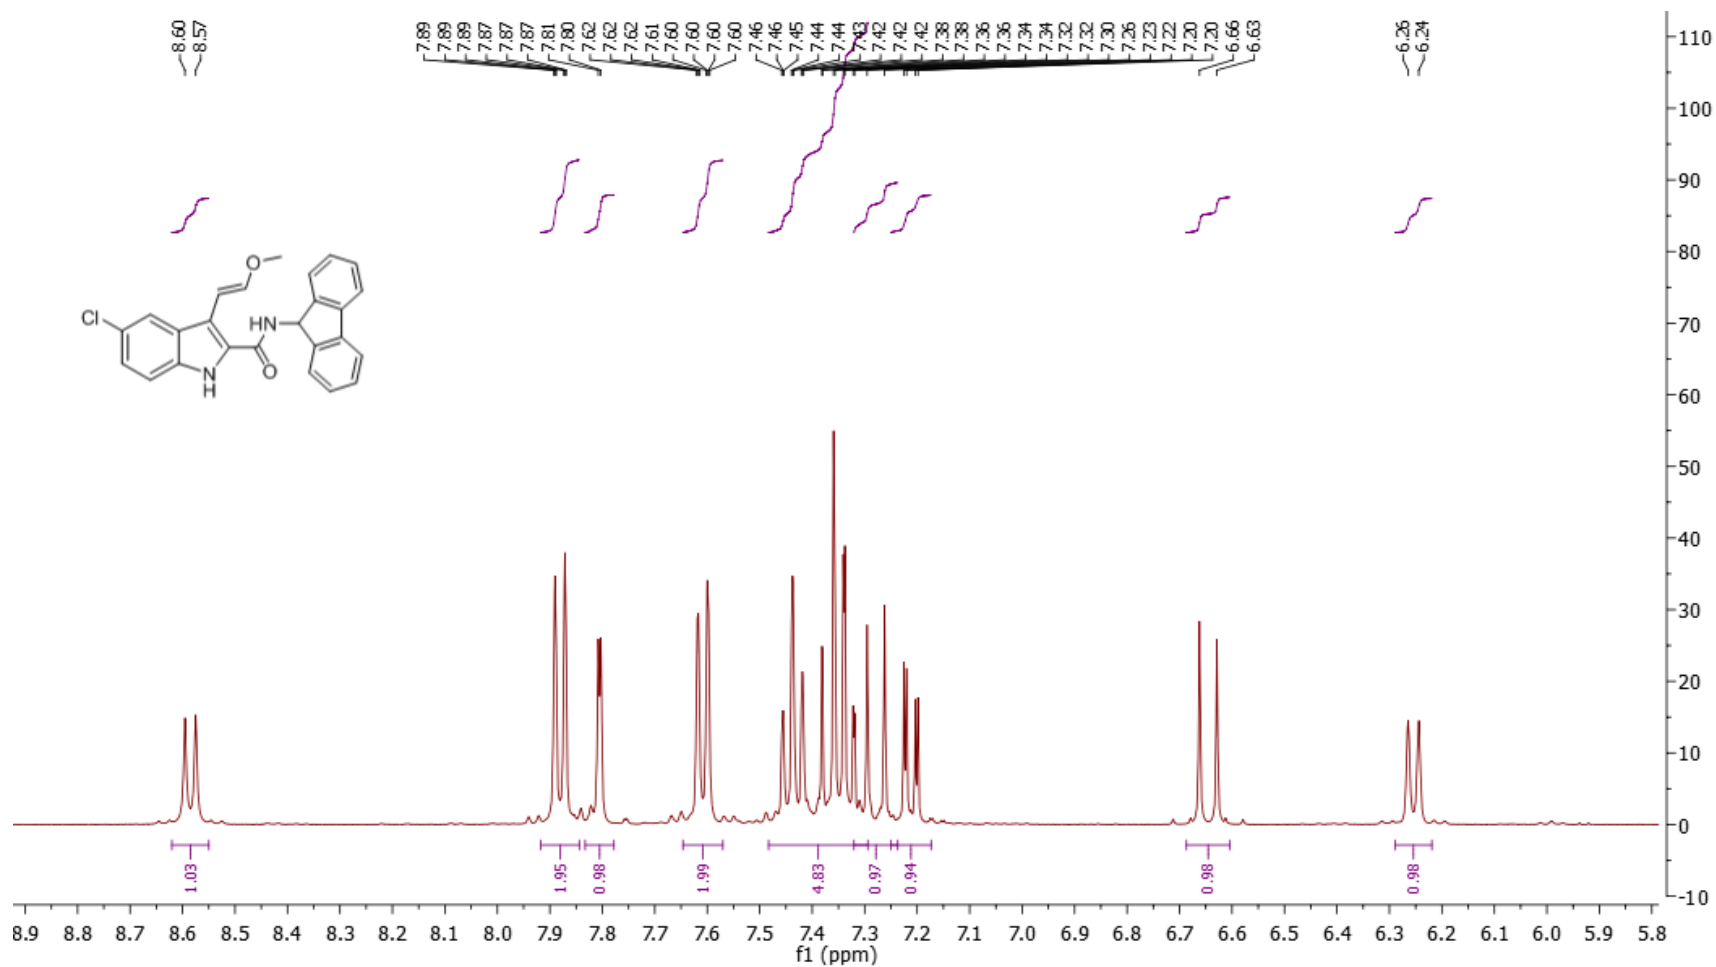

<sup>1</sup>H NMR (400 MHz, DMSO-*d*<sub>6</sub>) δ 11.46 (s, 1H), 8.59 (d, *J* = 8.2 Hz, 1H), 7.88 (d, *J* = 7.6 Hz, 2H), 7.81 (d, *J* = 2.0 Hz, 1H), 7.61 (q, *J* = 7.5 Hz, 2H), 7.48 – 7.32 (m, 5H), 7.28 (d, *J* = 13.3 Hz, 1H), 7.21 (dd, *J* = 8.7, 2.0 Hz, 1H), 6.65 (d, *J* = 13.3 Hz, 1H), 6.25 (d, *J* = 8.1 Hz, 1H), 3.66 (s, 3H).



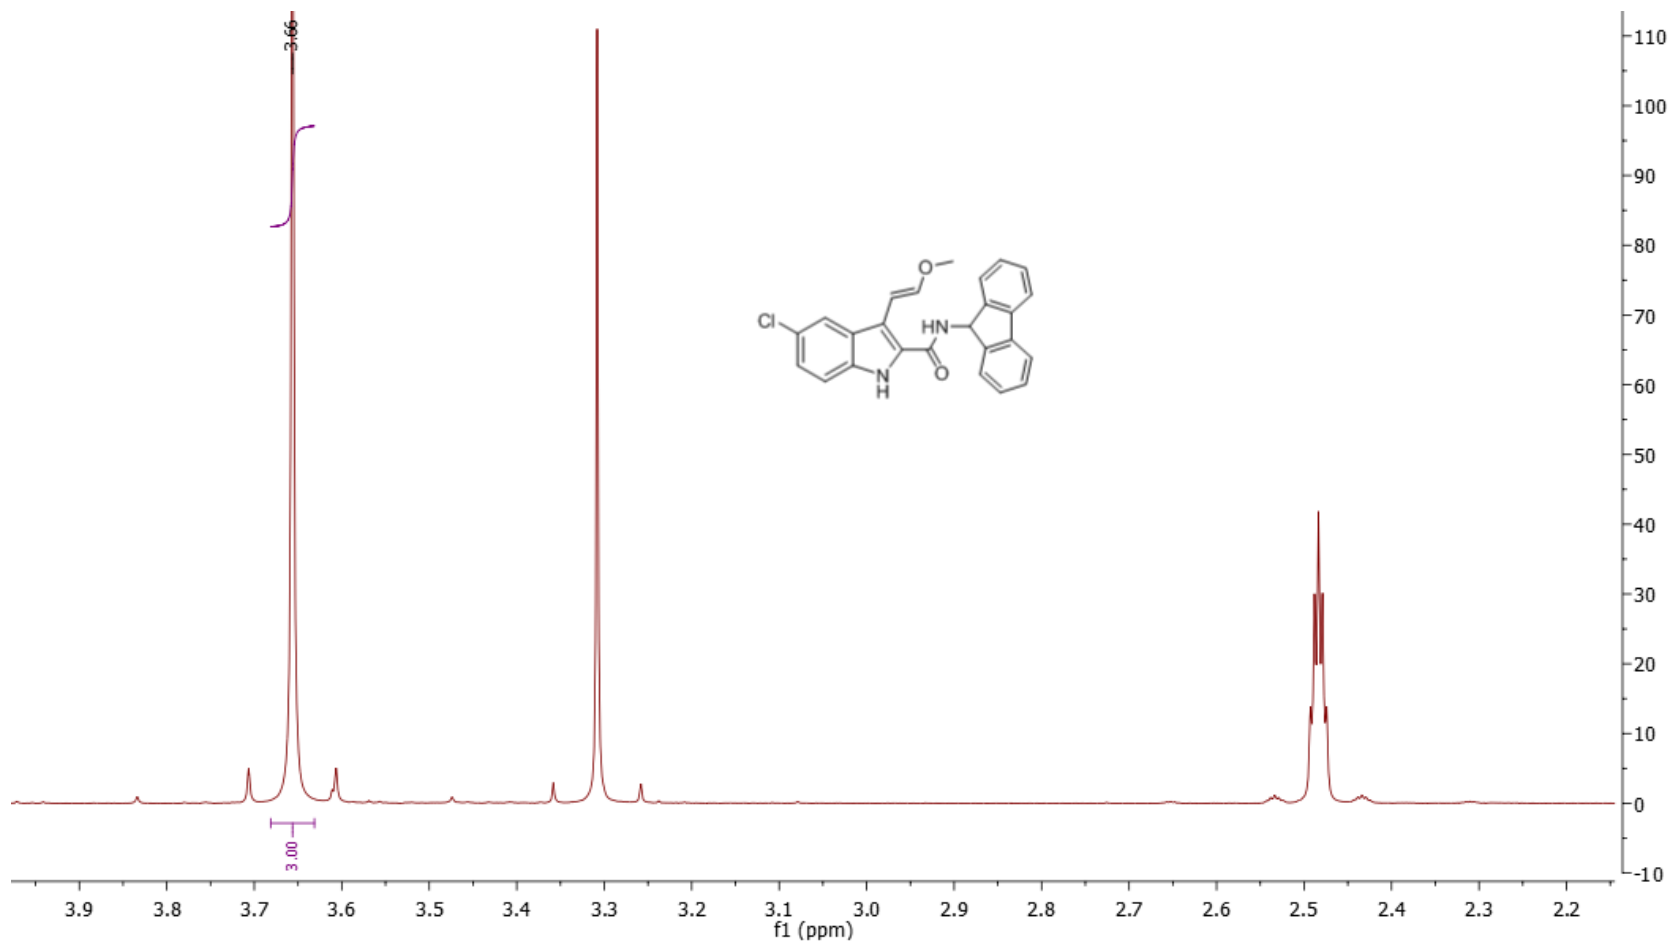

$^1\text{H}$  NMR (400 MHz,  $\text{DMSO-}d_6$ )  $\delta$  11.46 (s, 1H), 8.59 (d,  $J = 8.2$  Hz, 1H), 7.88 (d,  $J = 7.6$  Hz, 2H), 7.81 (d,  $J = 2.0$  Hz, 1H), 7.61 (q,  $J = 7.5$  Hz, 2H), 7.48 – 7.32 (m, 5H), 7.28 (d,  $J = 13.3$  Hz, 1H), 7.21 (dd,  $J = 8.7, 2.0$  Hz, 1H), 6.65 (d,  $J = 13.3$  Hz, 1H), 6.25 (d,  $J = 8.1$  Hz, 1H), 3.66 (s, 3H).

# $^{13}\text{C}$ NMR spectrum of **6b**

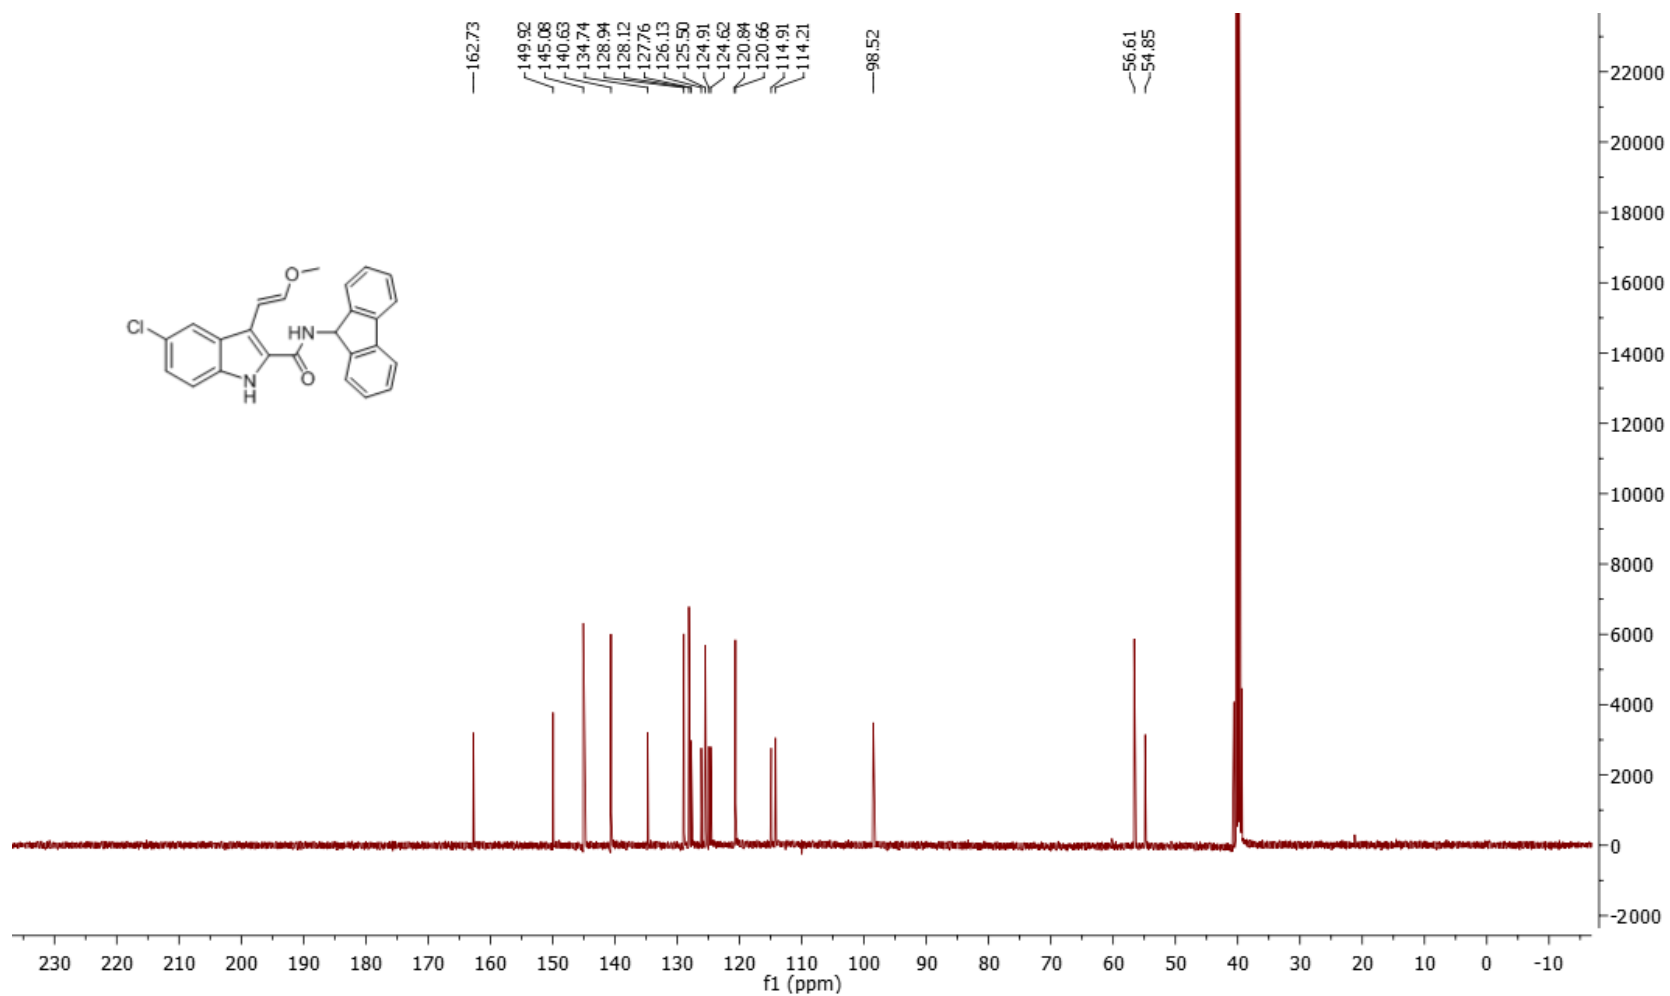

$^{13}\text{C}$  NMR (101 MHz, dms)  $\delta$  162.73, 149.92, 145.08, 140.63, 134.74, 128.94, 128.12, 127.76, 126.13, 125.50, 124.91, 124.62, 120.84, 120.66, 114.91, 114.21, 98.52, 56.61, 54.85.

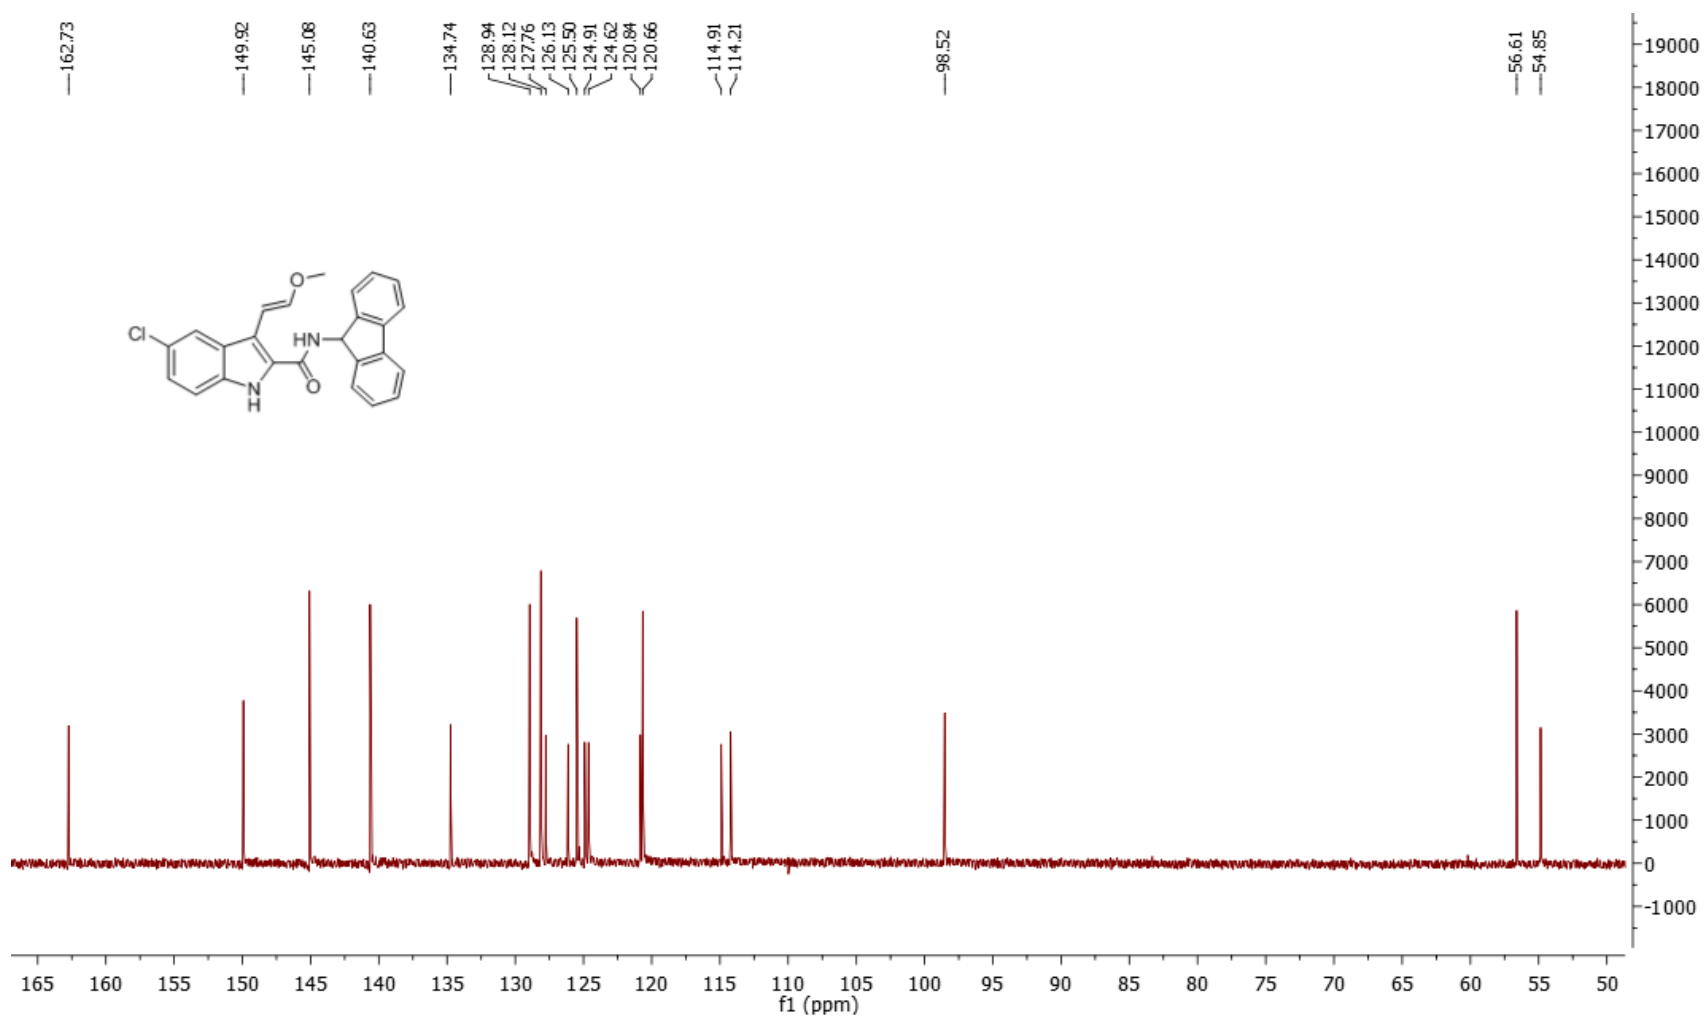

$^{13}\text{C}$  NMR (101 MHz, dmso)  $\delta$  162.73, 149.92, 145.08, 140.63, 134.74, 128.94, 128.12, 127.76, 126.13, 125.50, 124.91, 124.62, 120.84, 120.66, 114.91, 114.21, 98.52, 56.61, 54.85.

# $^1\text{H}$ NMR spectrum of **6c**

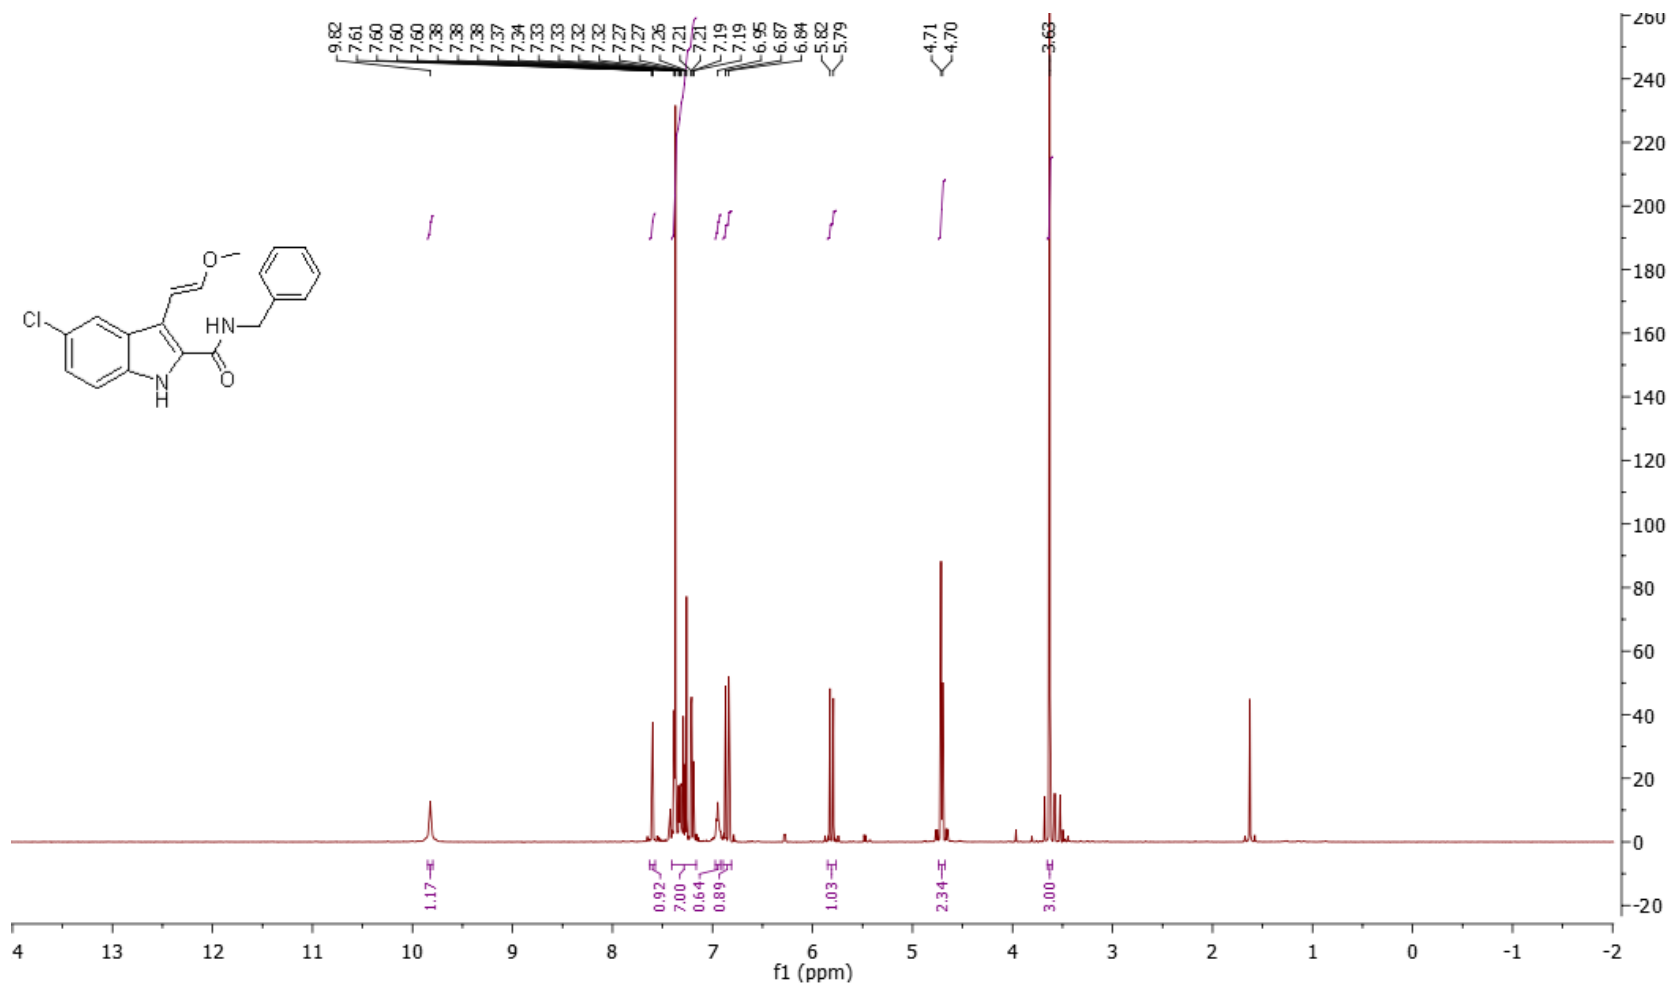

$^1\text{H}$  NMR (400 MHz, Chloroform-*d*)  $\delta$  9.82 (s, 1H), 7.60 (d,  $J = 2.0$ , Hz, 1H), 7.41 – 7.16 (m, 7H), 6.95 (s, 1H), 6.85 (d,  $J = 13.0$  Hz, 1H), 5.81 (d,  $J = 13.0$  Hz, 1H), 4.71 (d,  $J = 5.7$  Hz, 2H), 3.63 (s, 3H).

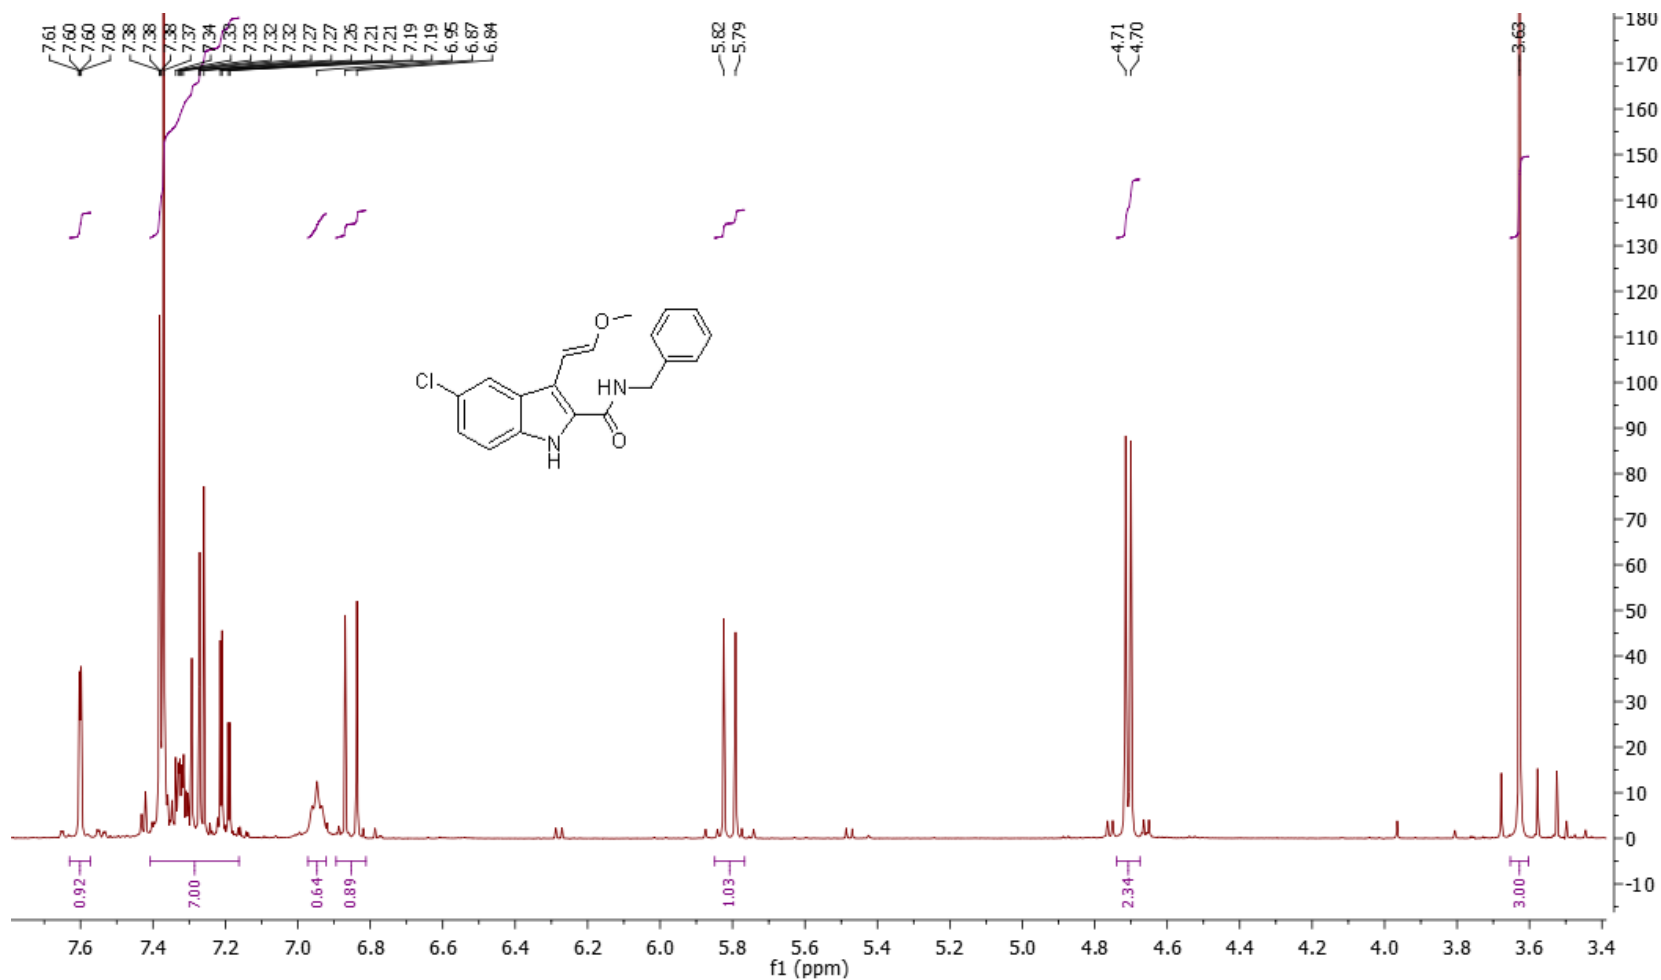

$^1\text{H}$  NMR (400 MHz, Chloroform-*d*)  $\delta$  9.82 (s, 1H), 7.60 (d,  $J = 2.0$ , Hz, 1H), 7.41 – 7.16 (m, 7H), 6.95 (s, 1H), 6.85 (d,  $J = 13.0$  Hz, 1H), 5.81 (d,  $J = 13.0$  Hz, 1H), 4.71 (d,  $J = 5.7$  Hz, 2H), 3.63 (s, 3H).

# $^{13}\text{C}$ NMR spectrum of **6c**

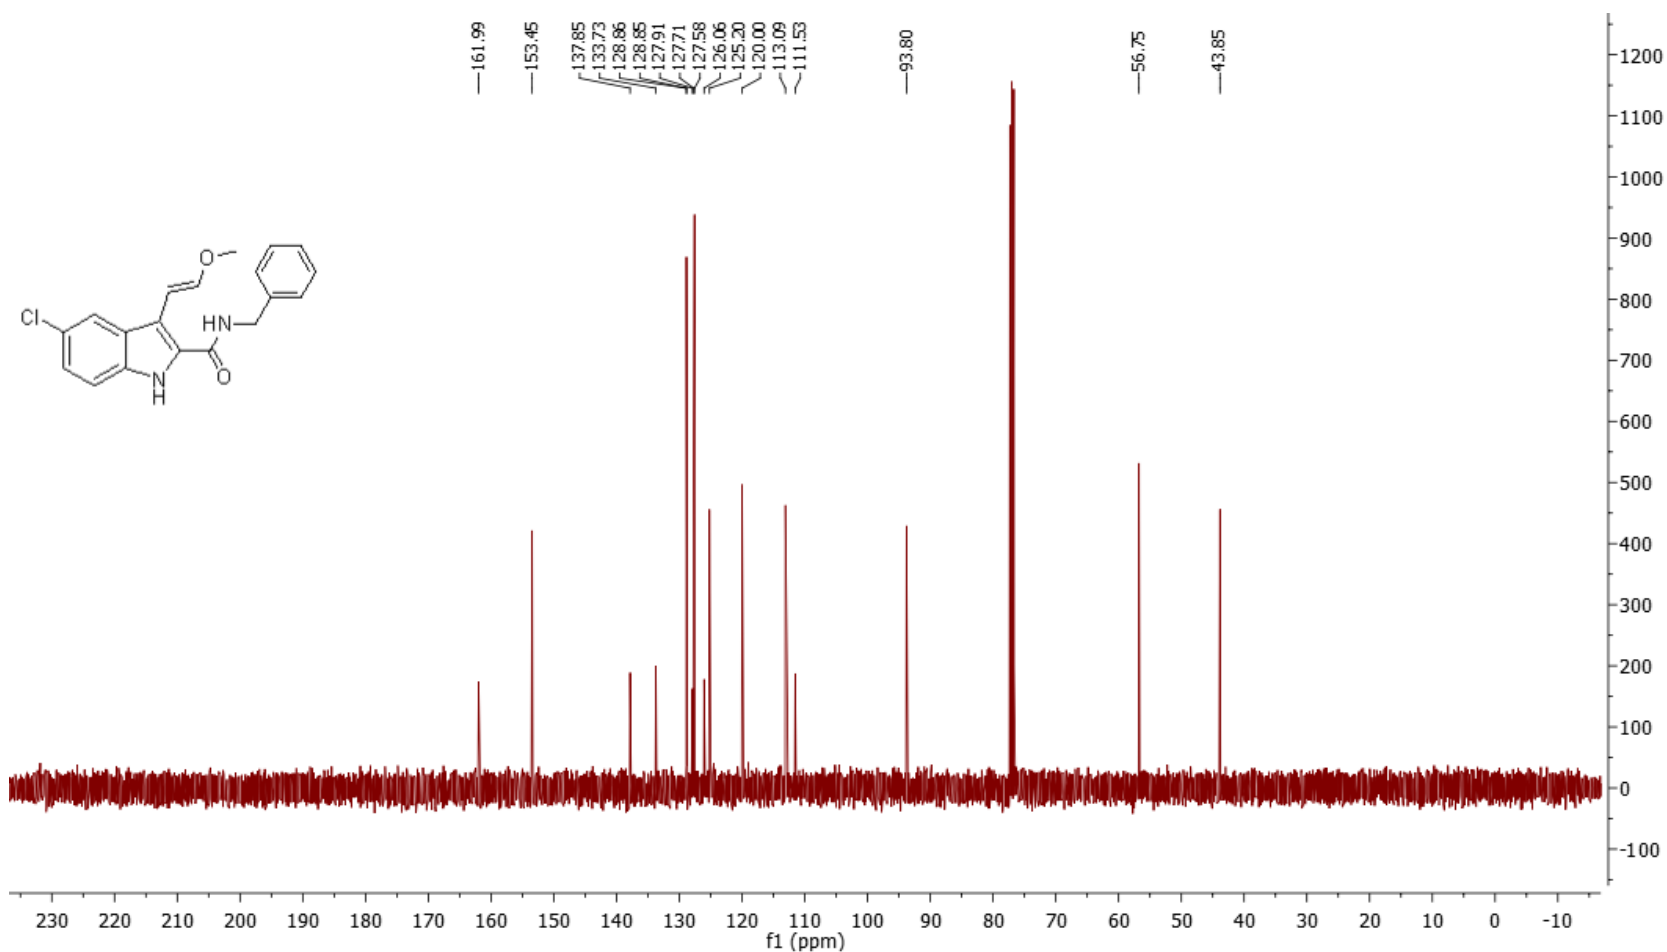

$^{13}\text{C}$  NMR (101 MHz,  $\text{CDCl}_3$ )  $\delta$  161.99, 153.45, 137.85, 133.73, 128.86, 128.85, 127.91, 127.71, 127.58, 126.06, 125.20, 120.00, 113.09, 111.53, 93.80, 56.75, 43.85.

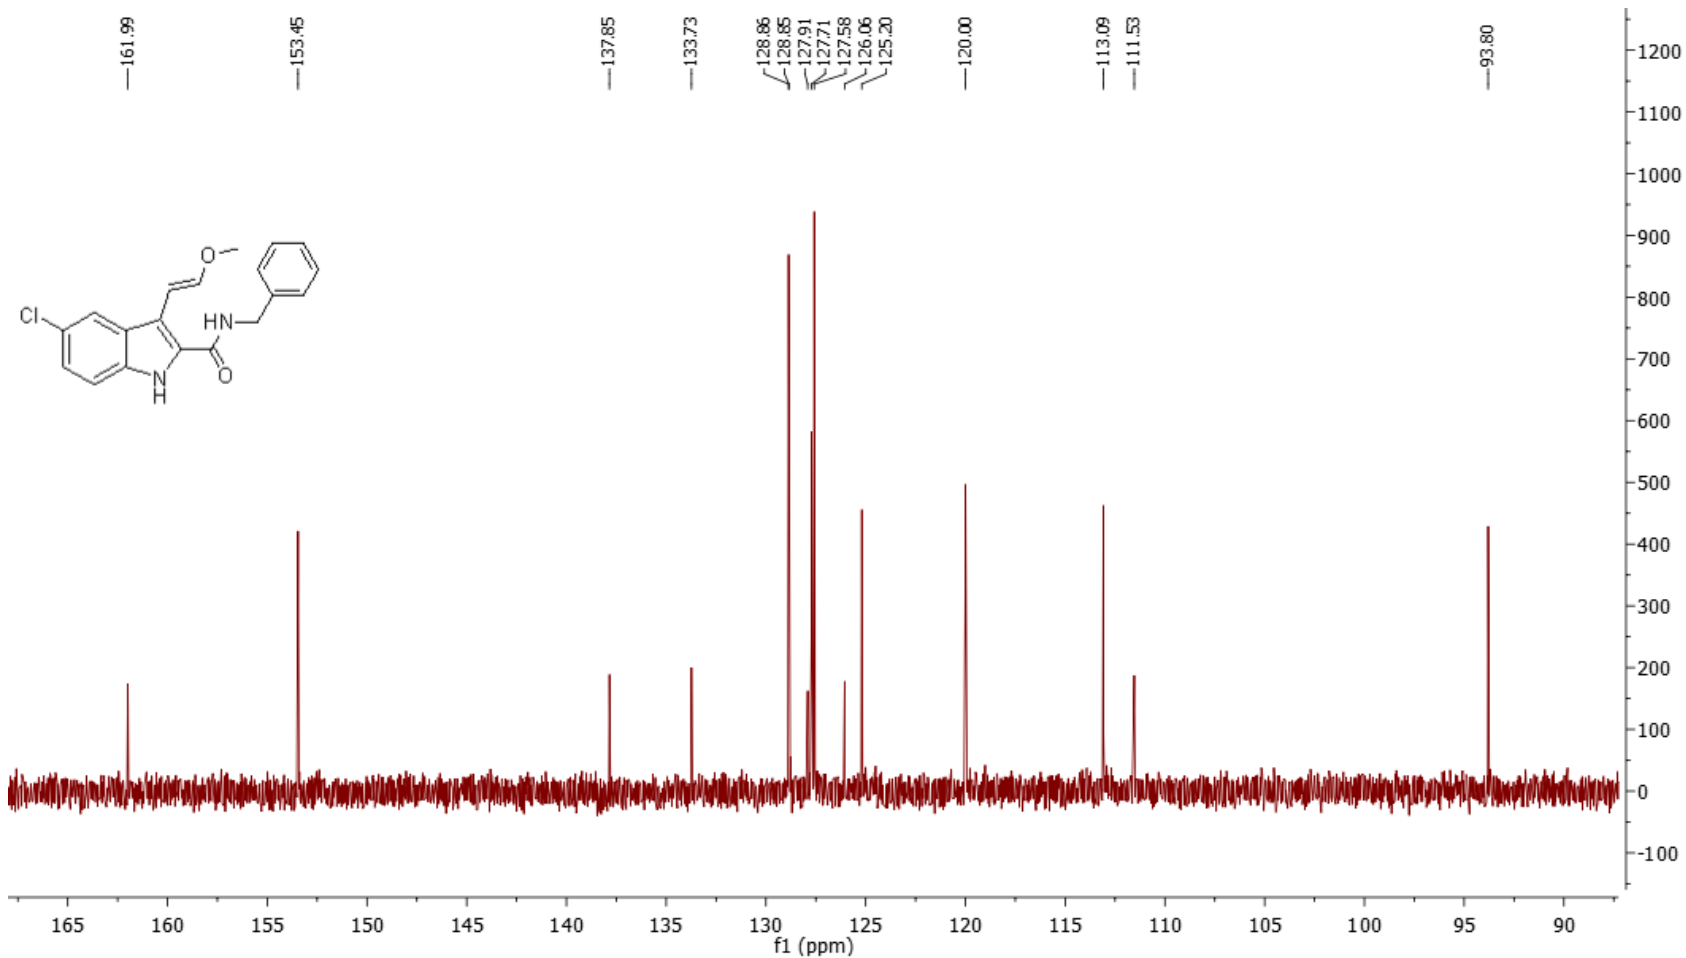

<sup>13</sup>C NMR (101 MHz, cdcl<sub>3</sub>) δ 161.99, 153.45, 137.85, 133.73, 128.86, 128.85, 127.91, 127.71, 127.58, 126.06, 125.20, 120.00, 113.09, 111.53, 93.80, 56.75, 43.85.

# $^1\text{H}$ NMR spectrum of **6d**

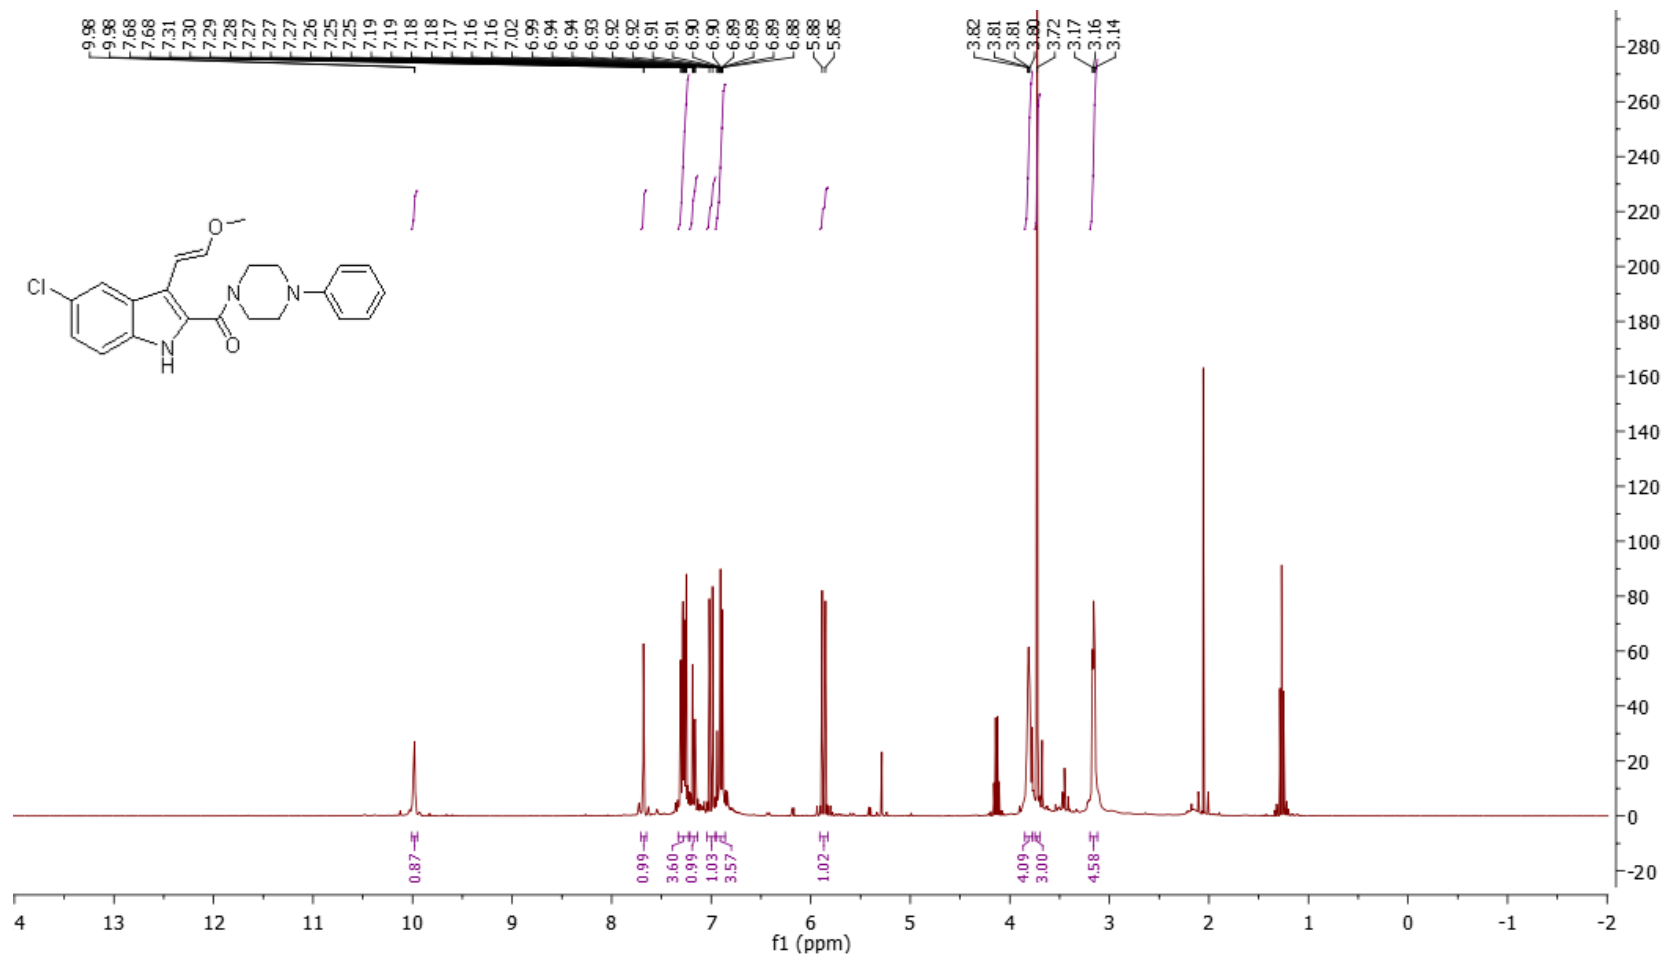

$^1\text{H}$  NMR (400 MHz, Chloroform-*d*)  $\delta$  9.98 (s, 1H), 7.68 (d,  $J = 2.0$  Hz, 1H), 7.33 – 7.23 (m, 3H), 7.21 – 7.14 (m, 1H), 7.00 (d,  $J = 13.0$  Hz, 1H), 6.96 – 6.86 (m, 3H), 5.87 (d,  $J = 13.0$  Hz, 1H), 3.81 (t,  $J = 6.5$  Hz, 4H), 3.72 (s, 3H), 3.16 (t,  $J = 5.2$  Hz, 4H).



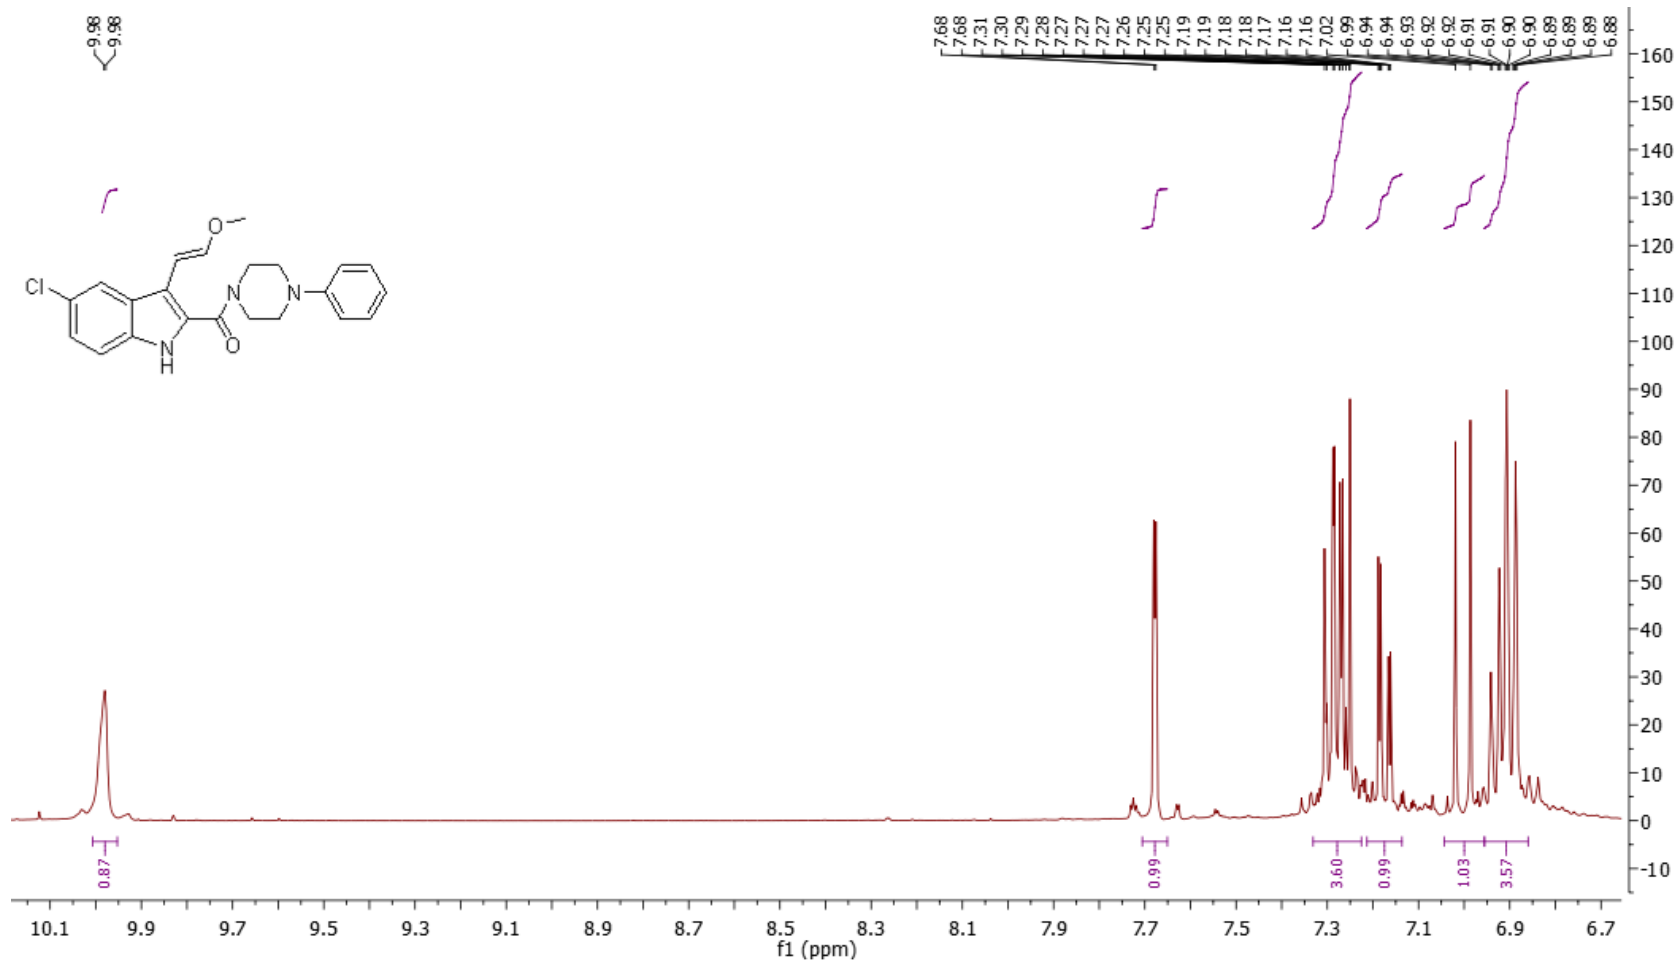

<sup>1</sup>H NMR (400 MHz, Chloroform-*d*) δ 9.98 (s, 1H), 7.68 (d, *J* = 2.0 Hz, 1H), 7.33 – 7.23 (m, 3H), 7.21 – 7.14 (m, 1H), 7.00 (d, *J* = 13.0 Hz, 1H), 6.96 – 6.86 (m, 3H), 5.87 (d, *J* = 13.0 Hz, 1H), 3.81 (t, *J* = 6.5 Hz, 4H), 3.72 (s, 3H), 3.16 (t, *J* = 5.2 Hz, 4H).

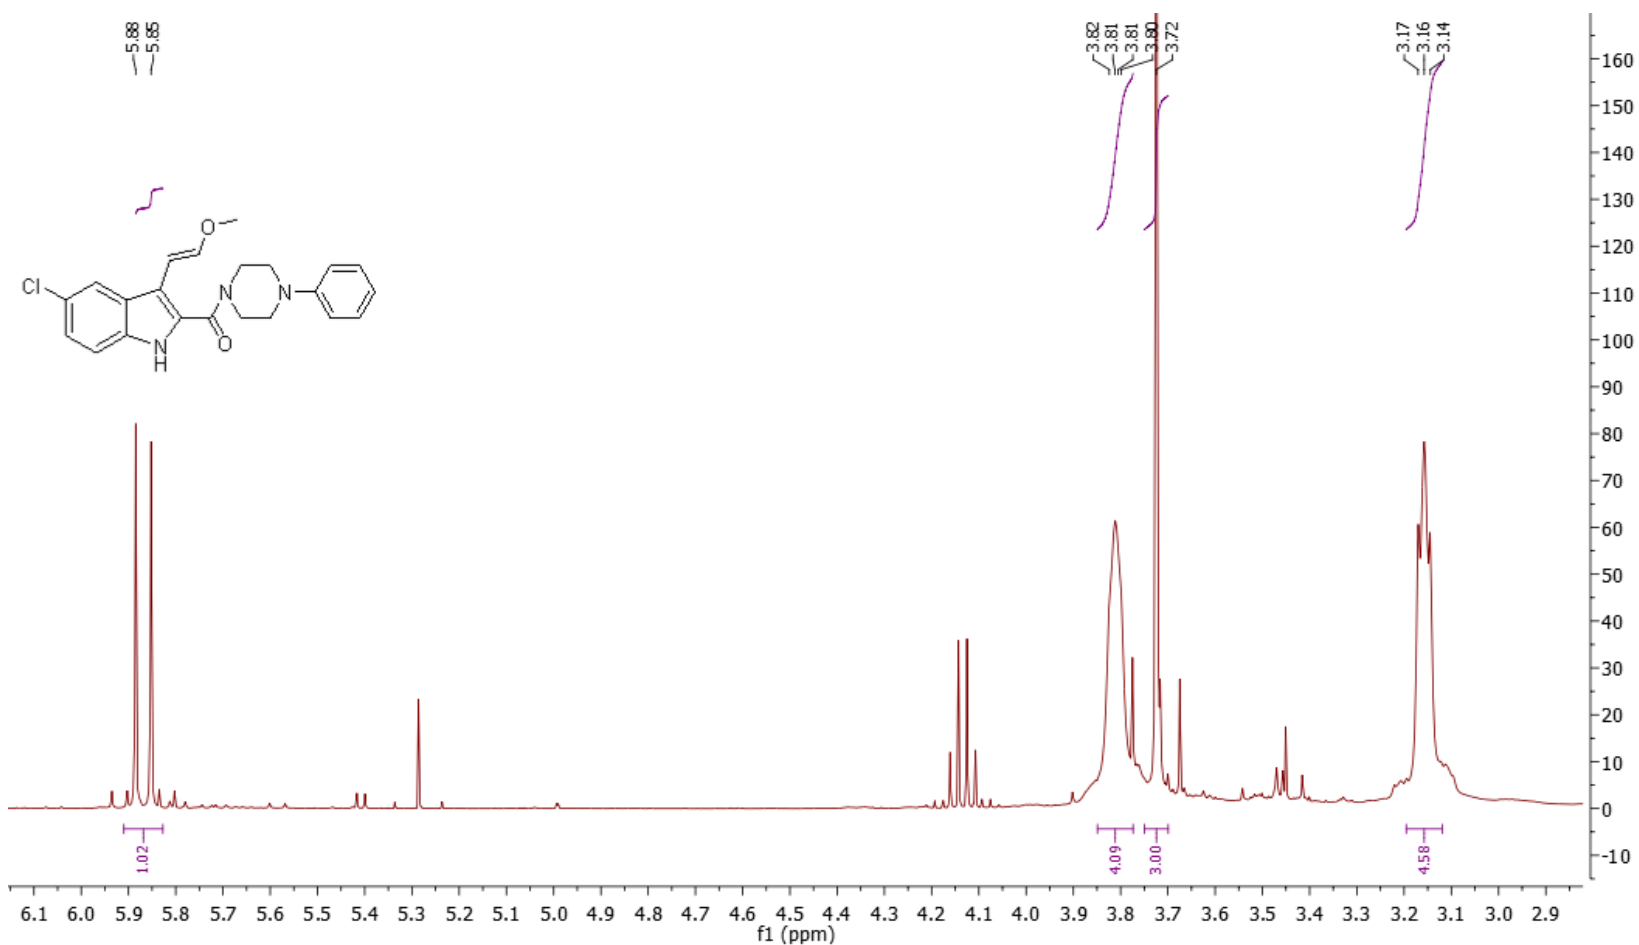

<sup>1</sup>H NMR (400 MHz, Chloroform-*d*) δ 9.98 (s, 1H), 7.68 (d, *J* = 2.0 Hz, 1H), 7.33 – 7.23 (m, 3H), 7.21 – 7.14 (m, 1H), 7.00 (d, *J* = 13.0 Hz, 1H), 6.96 – 6.86 (m, 3H), 5.87 (d, *J* = 13.0 Hz, 1H), 3.81 (t, *J* = 6.5 Hz, 4H), 3.72 (s, 3H), 3.16 (t, *J* = 5.2 Hz, 4H).

# $^{13}\text{C}$ NMR spectrum of 6d

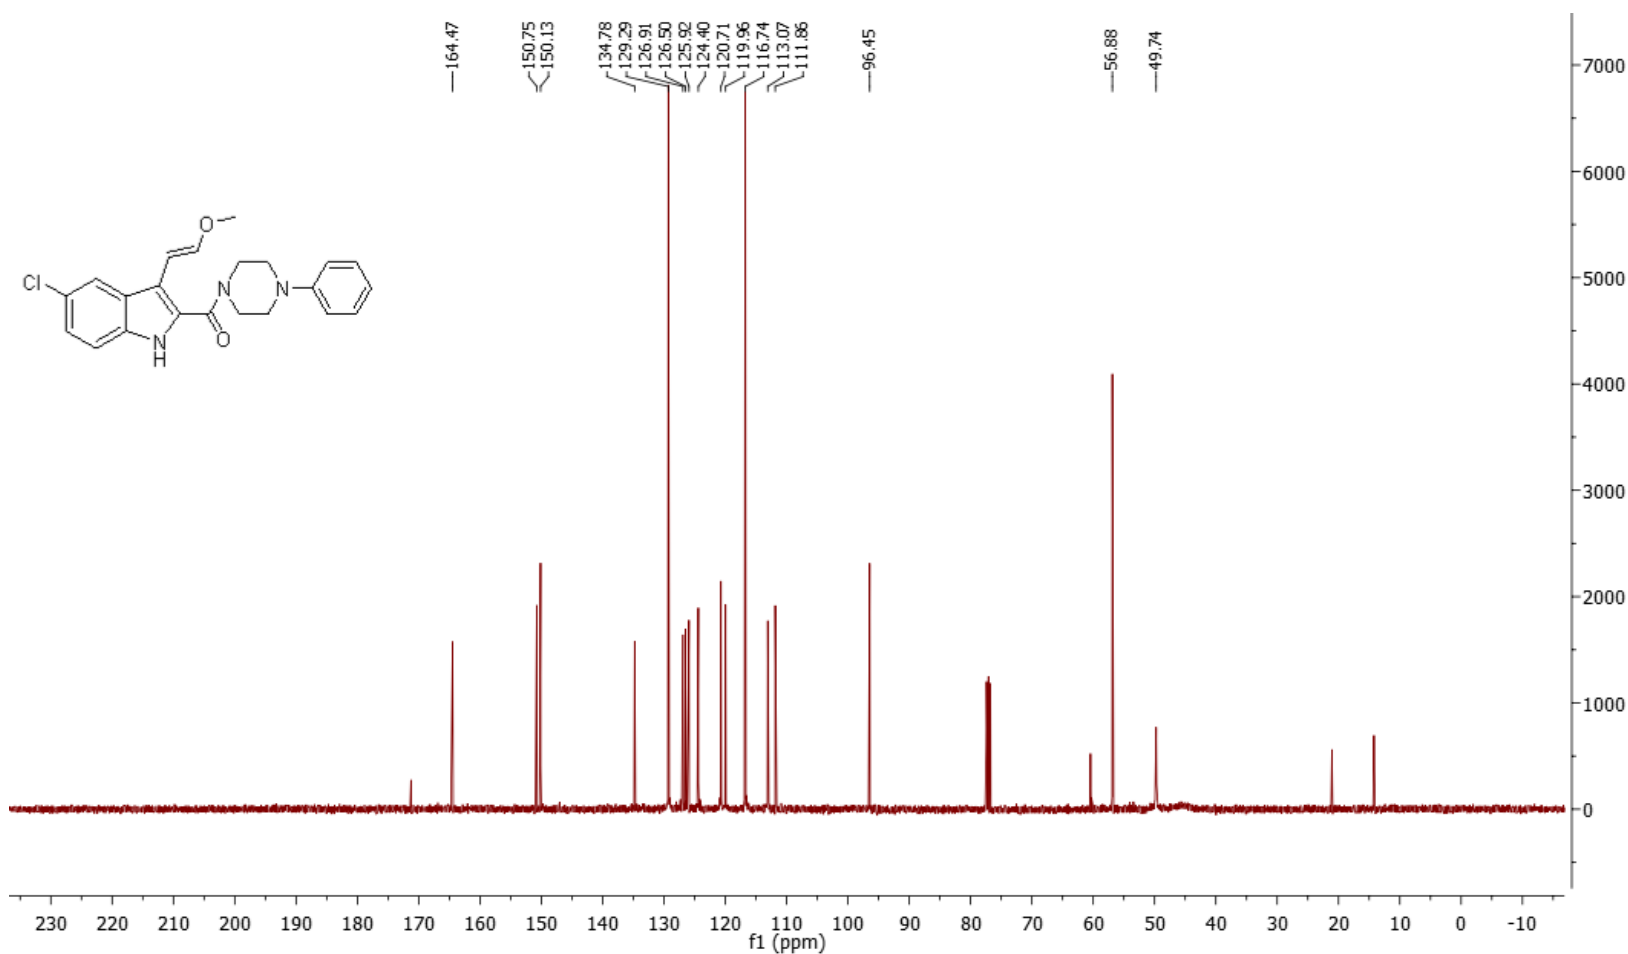

$^{13}\text{C}$  NMR (101 MHz,  $\text{cdCl}_3$ )  $\delta$  164.47, 150.75, 150.13, 134.78, 129.29, 126.91, 126.50, 125.92, 124.40, 120.71, 119.96, 116.74, 113.07, 111.86, 96.45, 56.88, 49.74.

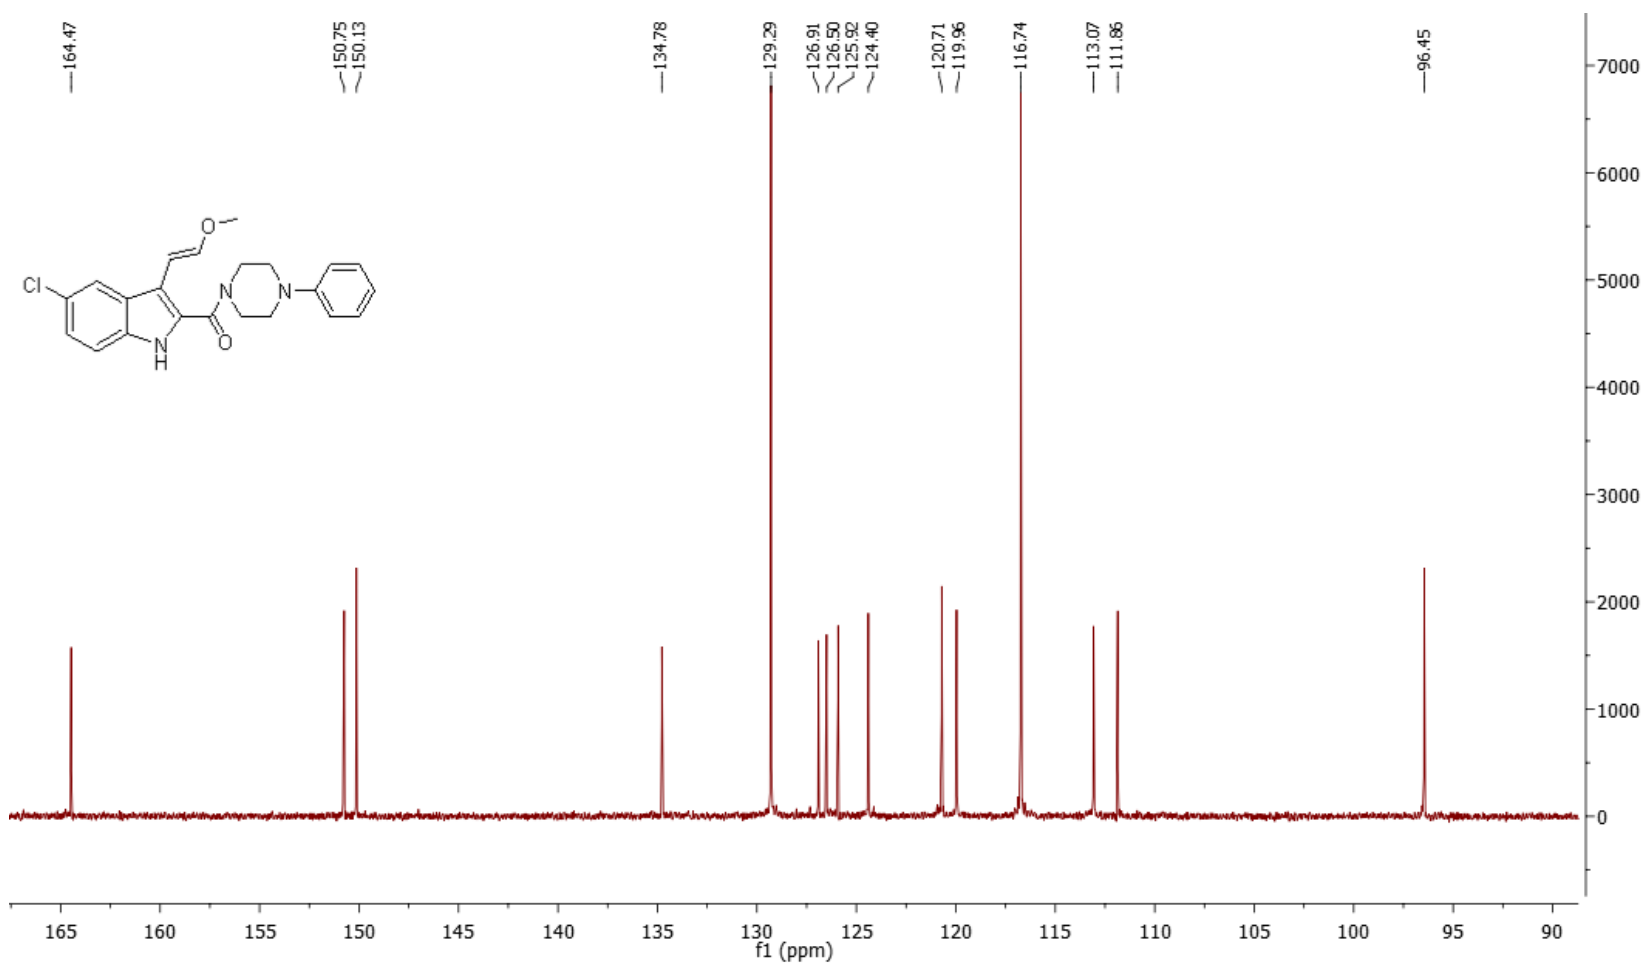

$^{13}\text{C}$  NMR (101 MHz,  $\text{cdCl}_3$ )  $\delta$  164.47, 150.75, 150.13, 134.78, 129.29, 126.91, 126.50, 125.92, 124.40, 120.71, 119.96, 116.74, 113.07, 111.86, 96.45, 56.88, 49.74.

# $^1\text{H}$ NMR spectrum of **6e**

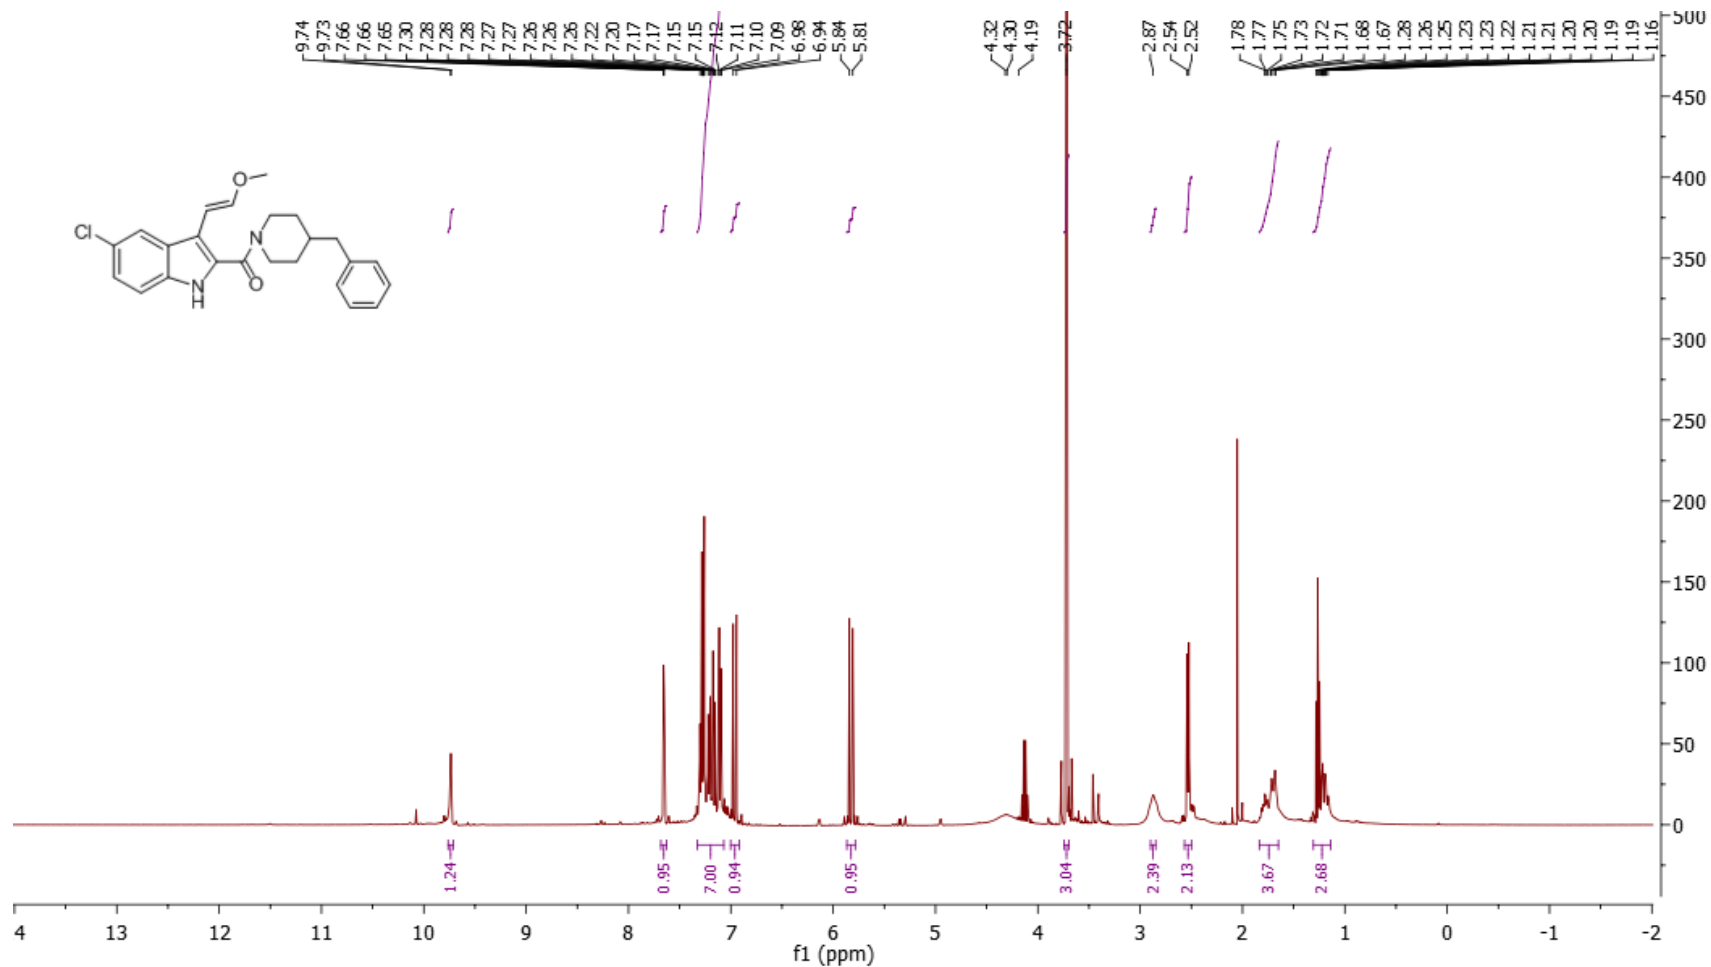

$^1\text{H}$  NMR (400 MHz, Chloroform-*d*)  $\delta$  9.74 (s, 1H), 7.65 (s, 1H), 7.33 – 7.07 (m, 7H), 6.96 (d,  $J = 13.0$  Hz, 1H), 5.82 (d,  $J = 13.0$  Hz, 1H), 3.72 (s, 3H), 2.89 - 2.85 (m, 2H), 2.53 (d,  $J = 7.0$  Hz, 2H), 1.84 – 1.65 (m, 4H), 1.31 – 1.14 (m, 3H).

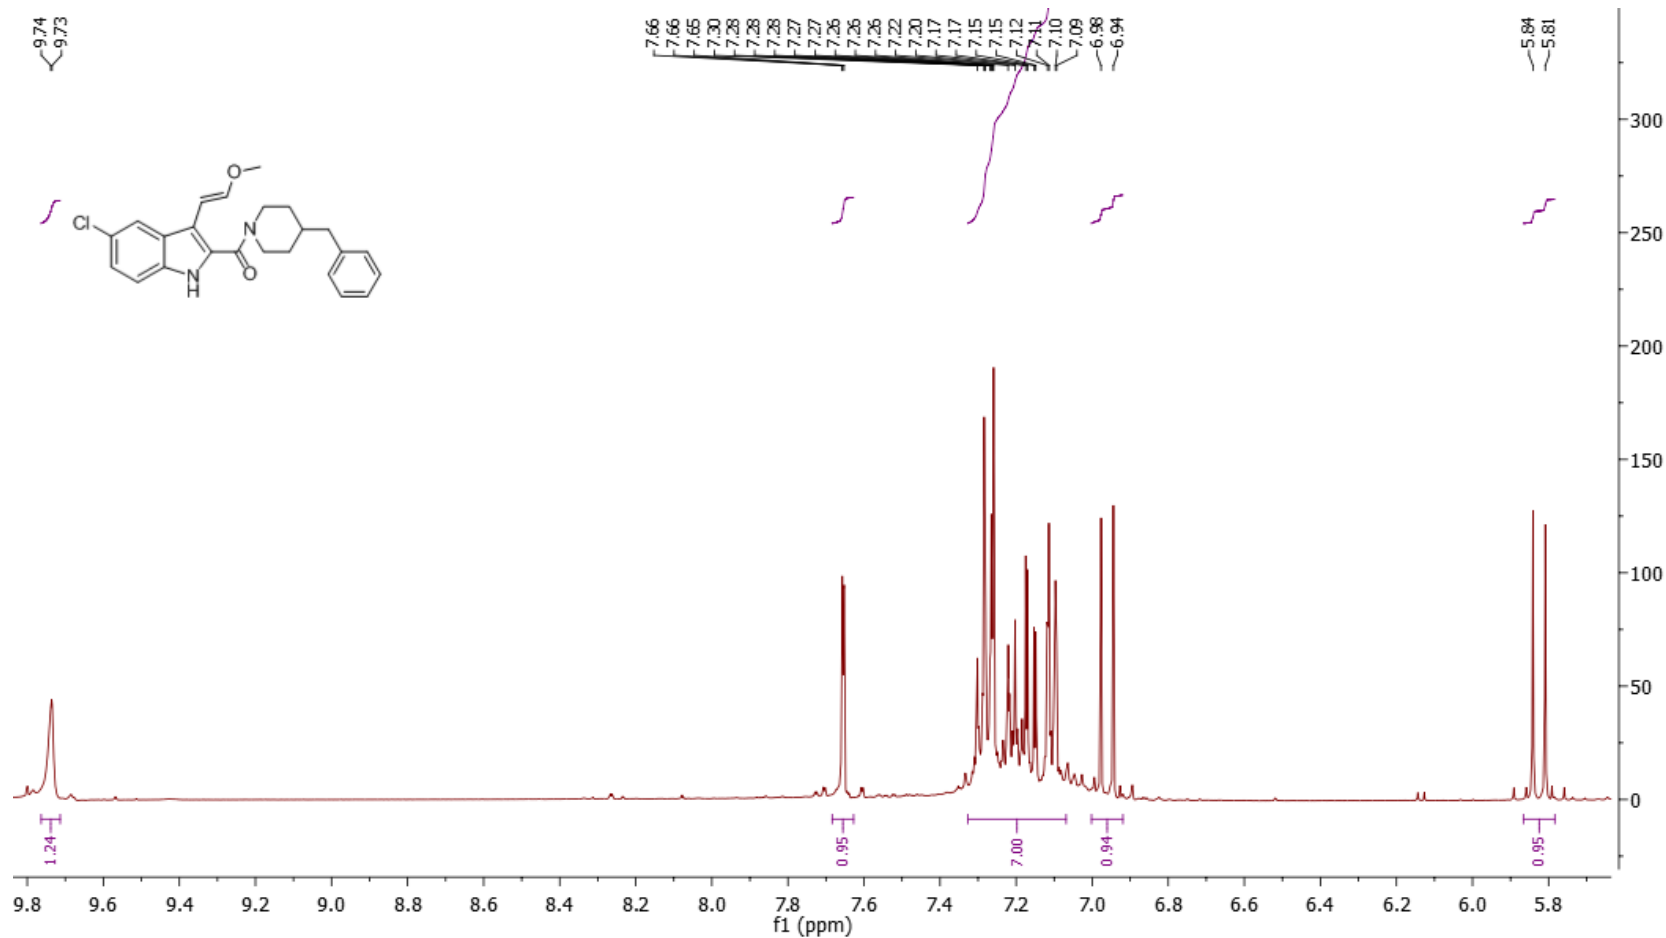

<sup>1</sup>H NMR (400 MHz, Chloroform-*d*)  $\delta$  9.74 (s, 1H), 7.65 (s, 1H), 7.33 – 7.07 (m, 7H), 6.96 (d,  $J = 13.0$  Hz, 1H), 5.82 (d,  $J = 13.0$  Hz, 1H), 3.72 (s, 3H), 2.89 - 2.85 (m, 2H), 2.53 (d,  $J = 7.0$  Hz, 2H), 1.84 – 1.65 (m, 4H), 1.31 – 1.14 (m, 3H).

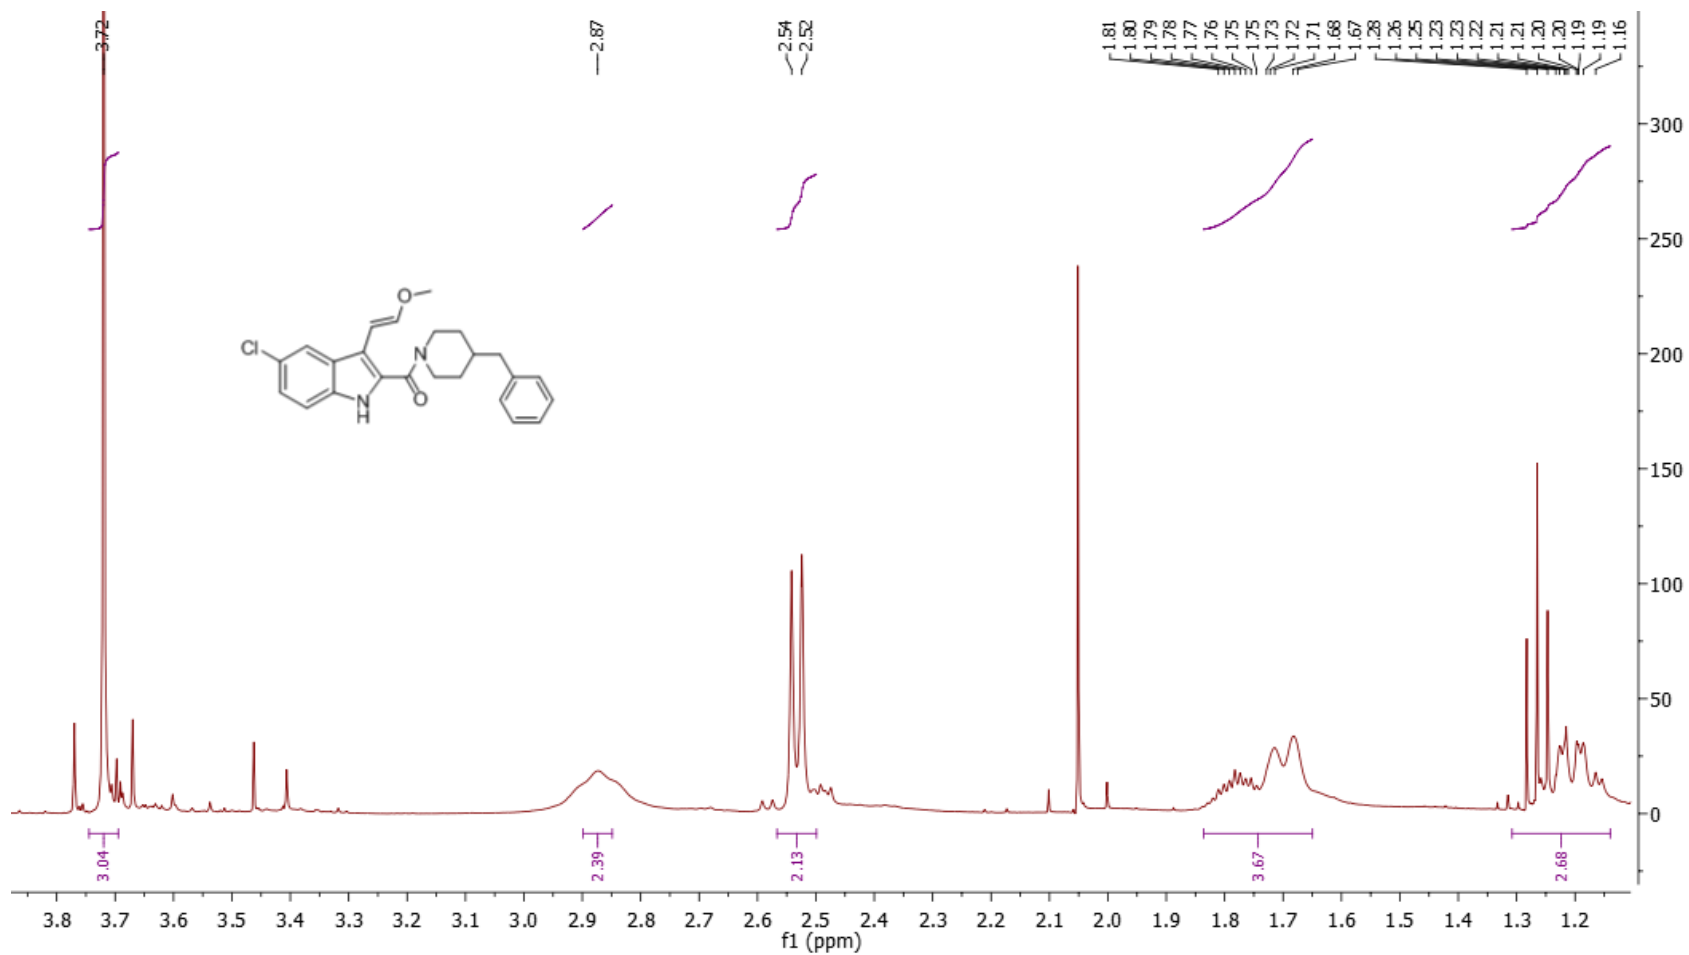

<sup>1</sup>H NMR (400 MHz, Chloroform-*d*) δ 9.74 (s, 1H), 7.65 (s, 1H), 7.33 – 7.07 (m, 7H), 6.96 (d, *J* = 13.0 Hz, 1H), 5.82 (d, *J* = 13.0 Hz, 1H), 3.72 (s, 3H), 2.89 - 2.85 (m, 2H), 2.53 (d, *J* = 7.0 Hz, 2H), 1.84 – 1.65 (m, 4H), 1.31 – 1.14 (m, 3H).

# $^{13}\text{C}$ NMR spectrum of **6e**

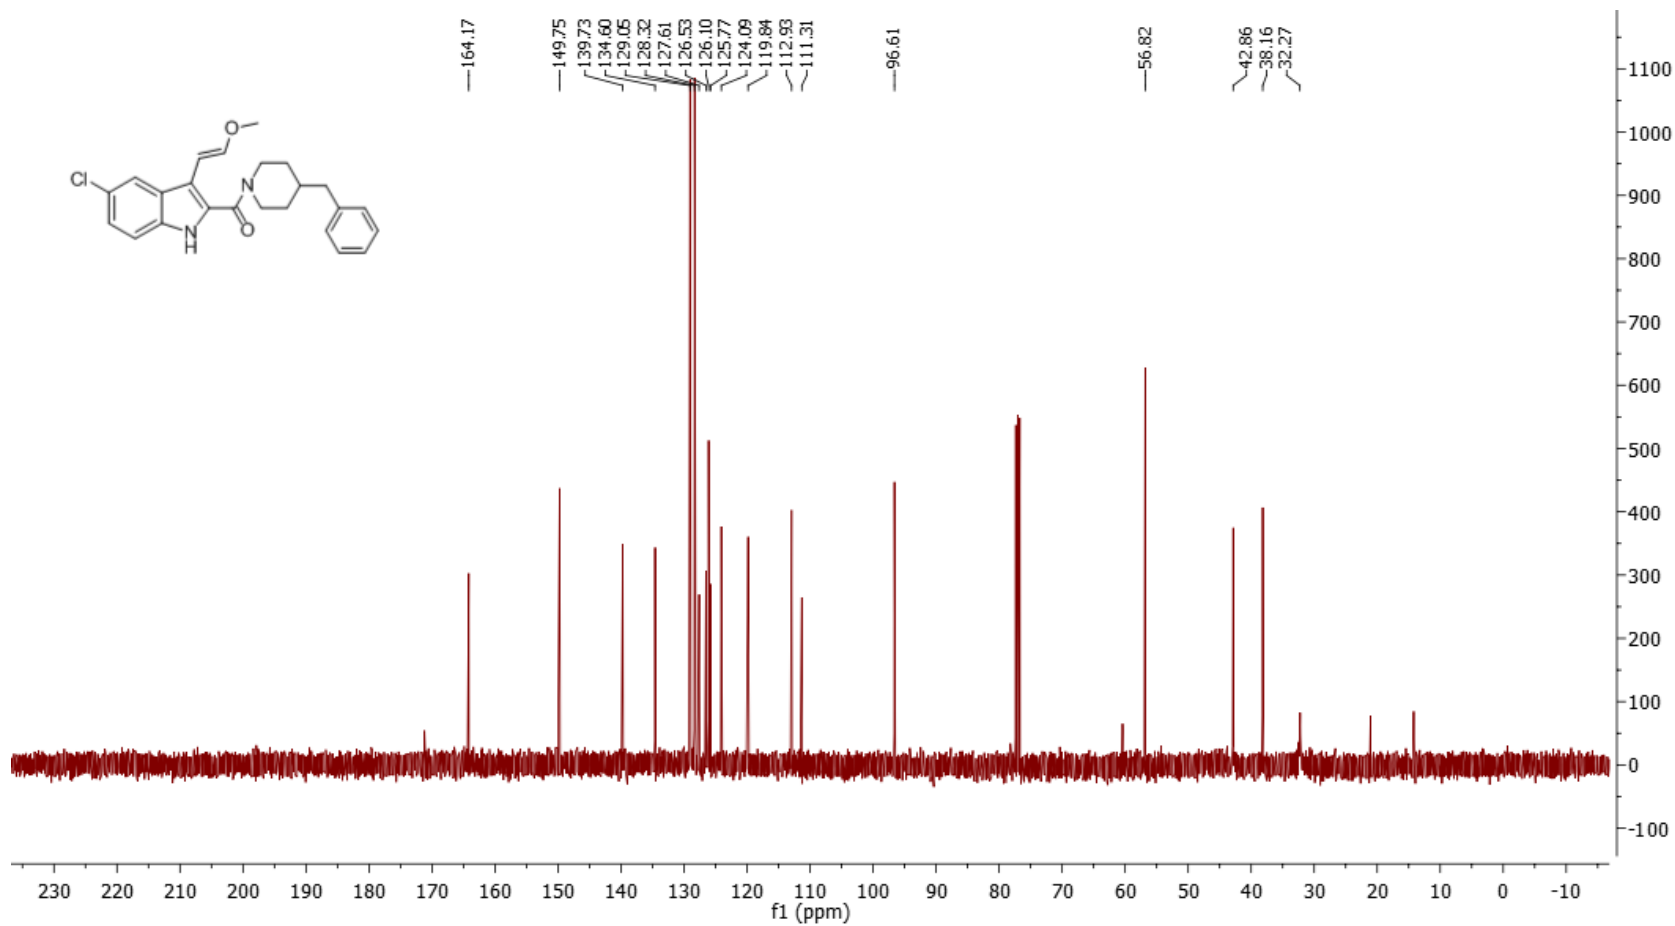

$^{13}\text{C}$  NMR (101 MHz,  $\text{CDCl}_3$ )  $\delta$  164.17, 149.75, 139.73, 134.60, 129.05, 128.32, 127.61, 126.53, 126.10, 125.77, 124.09, 119.84, 112.93, 111.31, 96.61, 56.82, 42.86, 38.16, 32.27.



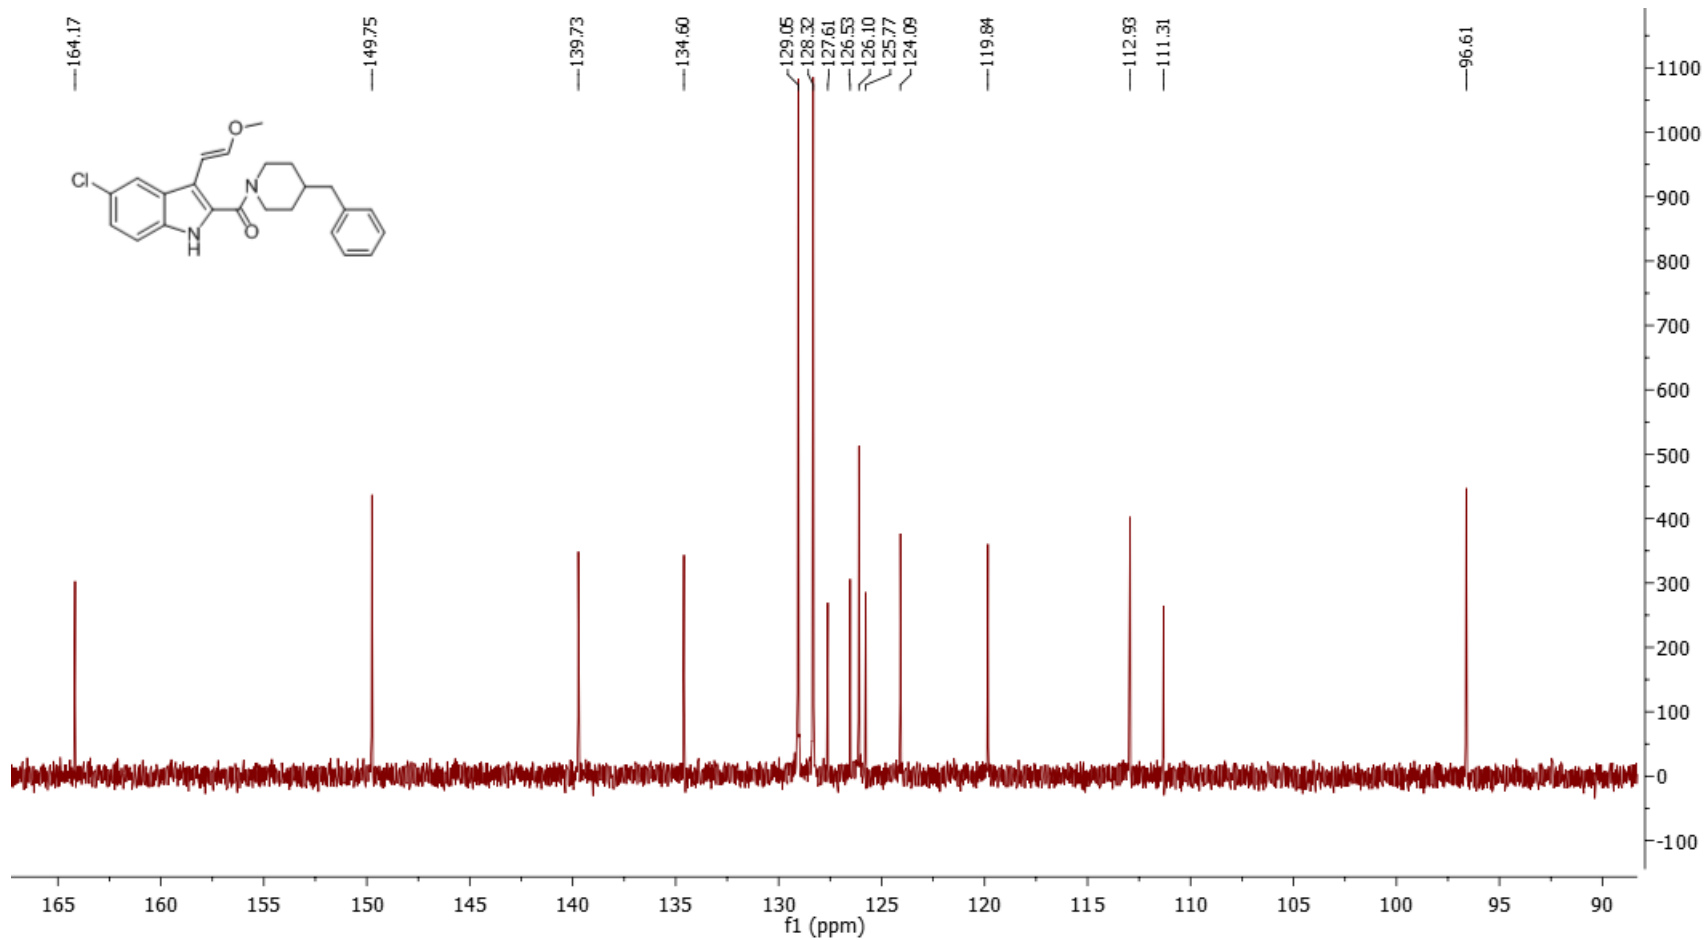

$^{13}\text{C}$  NMR (101 MHz,  $\text{cdCl}_3$ )  $\delta$  164.17, 149.75, 139.73, 134.60, 129.05, 128.32, 127.61, 126.53, 126.10, 125.77, 124.09, 119.84, 112.93, 111.31, 96.61, 56.82, 42.86, 38.16, 32.27.

# $^1\text{H}$ NMR spectrum of **6f**

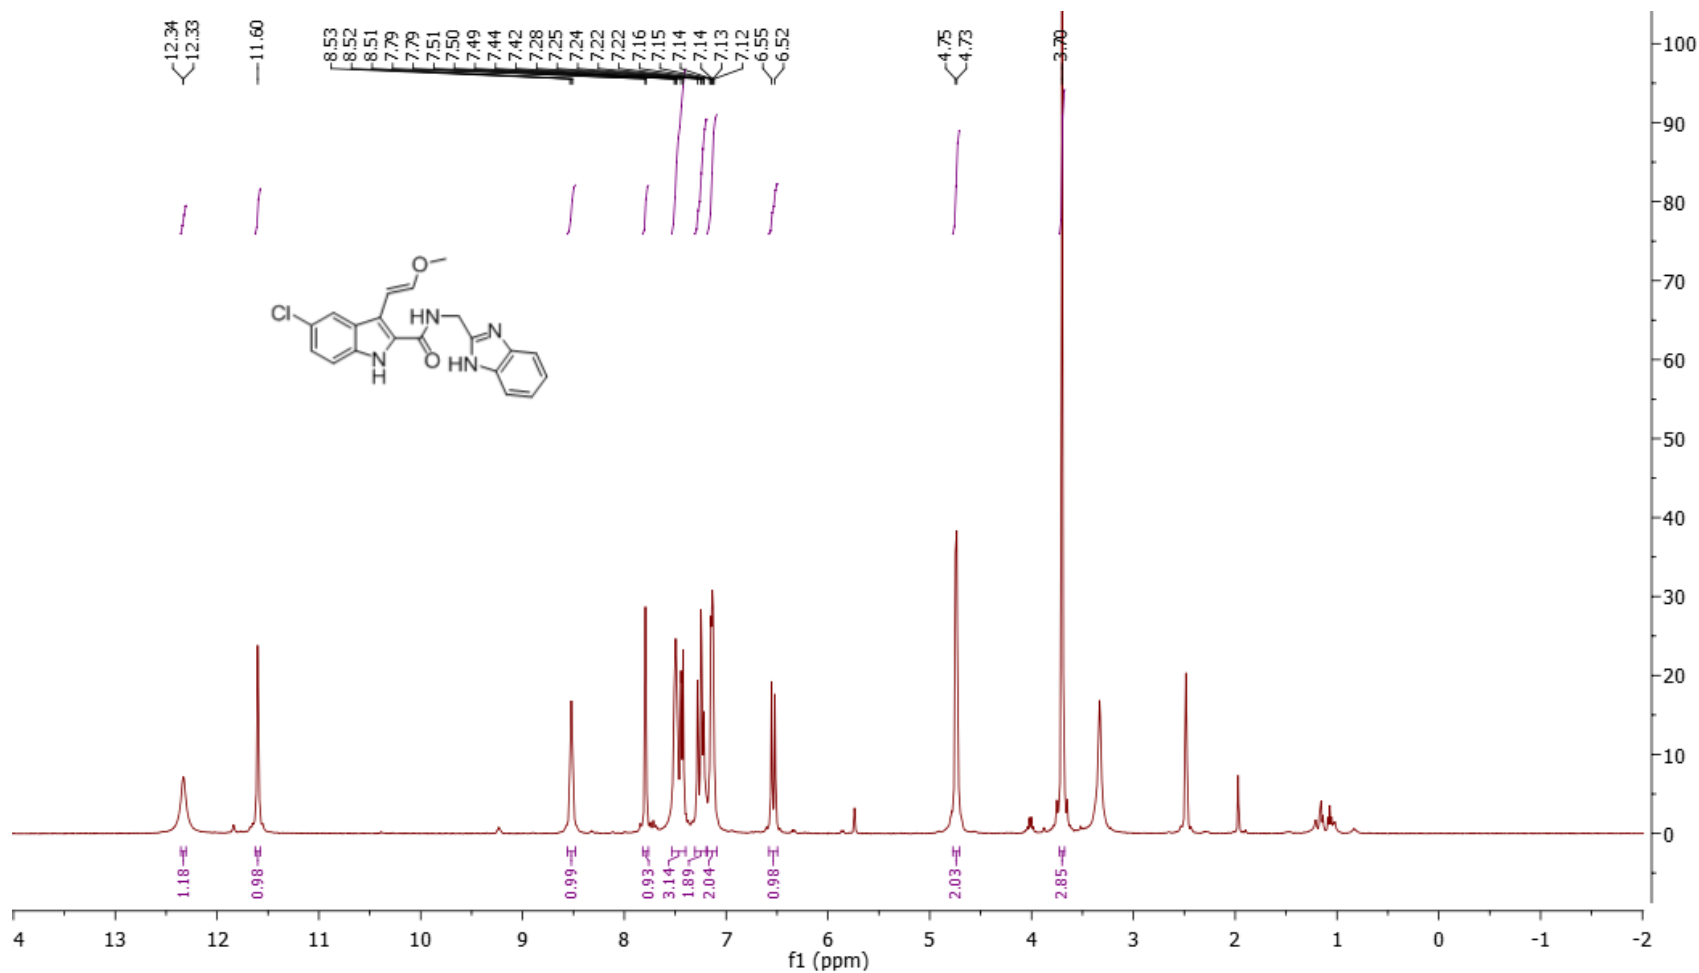

$^1\text{H}$  NMR (400 MHz,  $\text{DMSO-}d_6$ )  $\delta$  12.33 (s, 1H), 11.60 (s, 1H), 8.52 (t,  $J = 5.6$  Hz, 1H), 7.79 (s, 1H), 7.53 – 7.40 (m, 3H), 7.31 – 7.19 (m, 1H), 7.16- 7.12 (m, 2H), 6.54 (d,  $J = 13.2$  Hz, 1H), 4.74 (d,  $J = 5.6$  Hz, 2H), 3.70 (s, 3H).

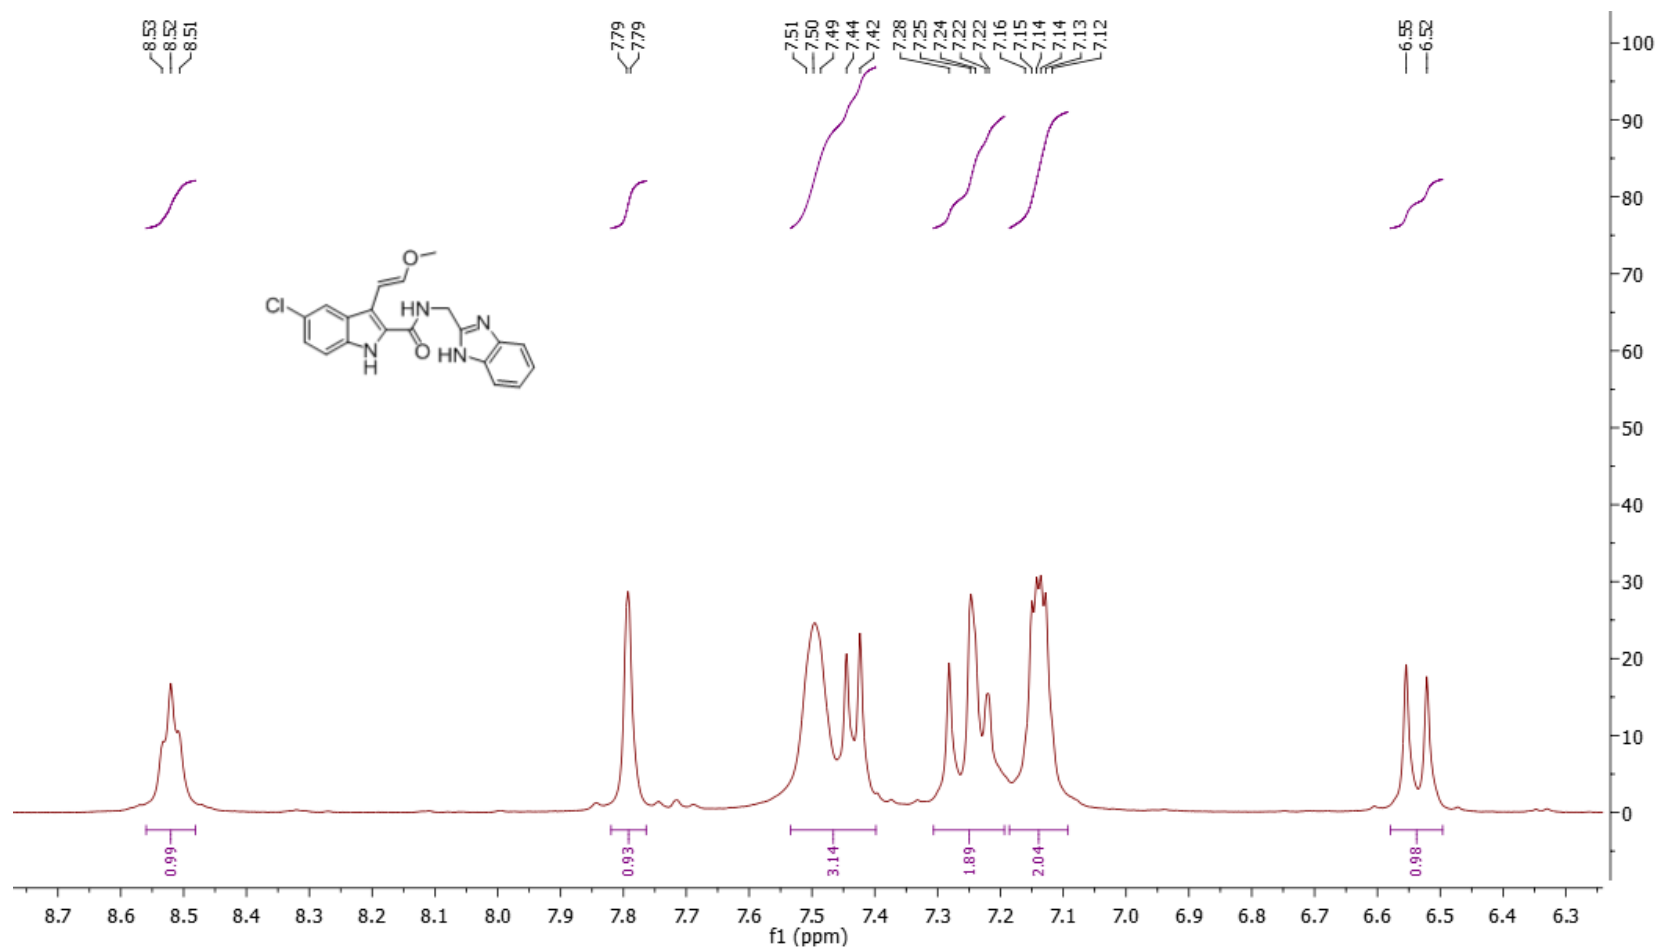

<sup>1</sup>H NMR (400 MHz, DMSO-*d*<sub>6</sub>) δ 12.33 (s, 1H), 11.60 (s, 1H), 8.52 (t, *J* = 5.6 Hz, 1H), 7.79 (s, 1H), 7.53 – 7.40 (m, 3H), 7.31 – 7.19 (m, 1H), 7.16- 7.12 (m, 2H), 6.54 (d, *J* = 13.2 Hz, 1H), 4.74 (d, *J* = 5.6 Hz, 2H), 3.70 (s, 3H).

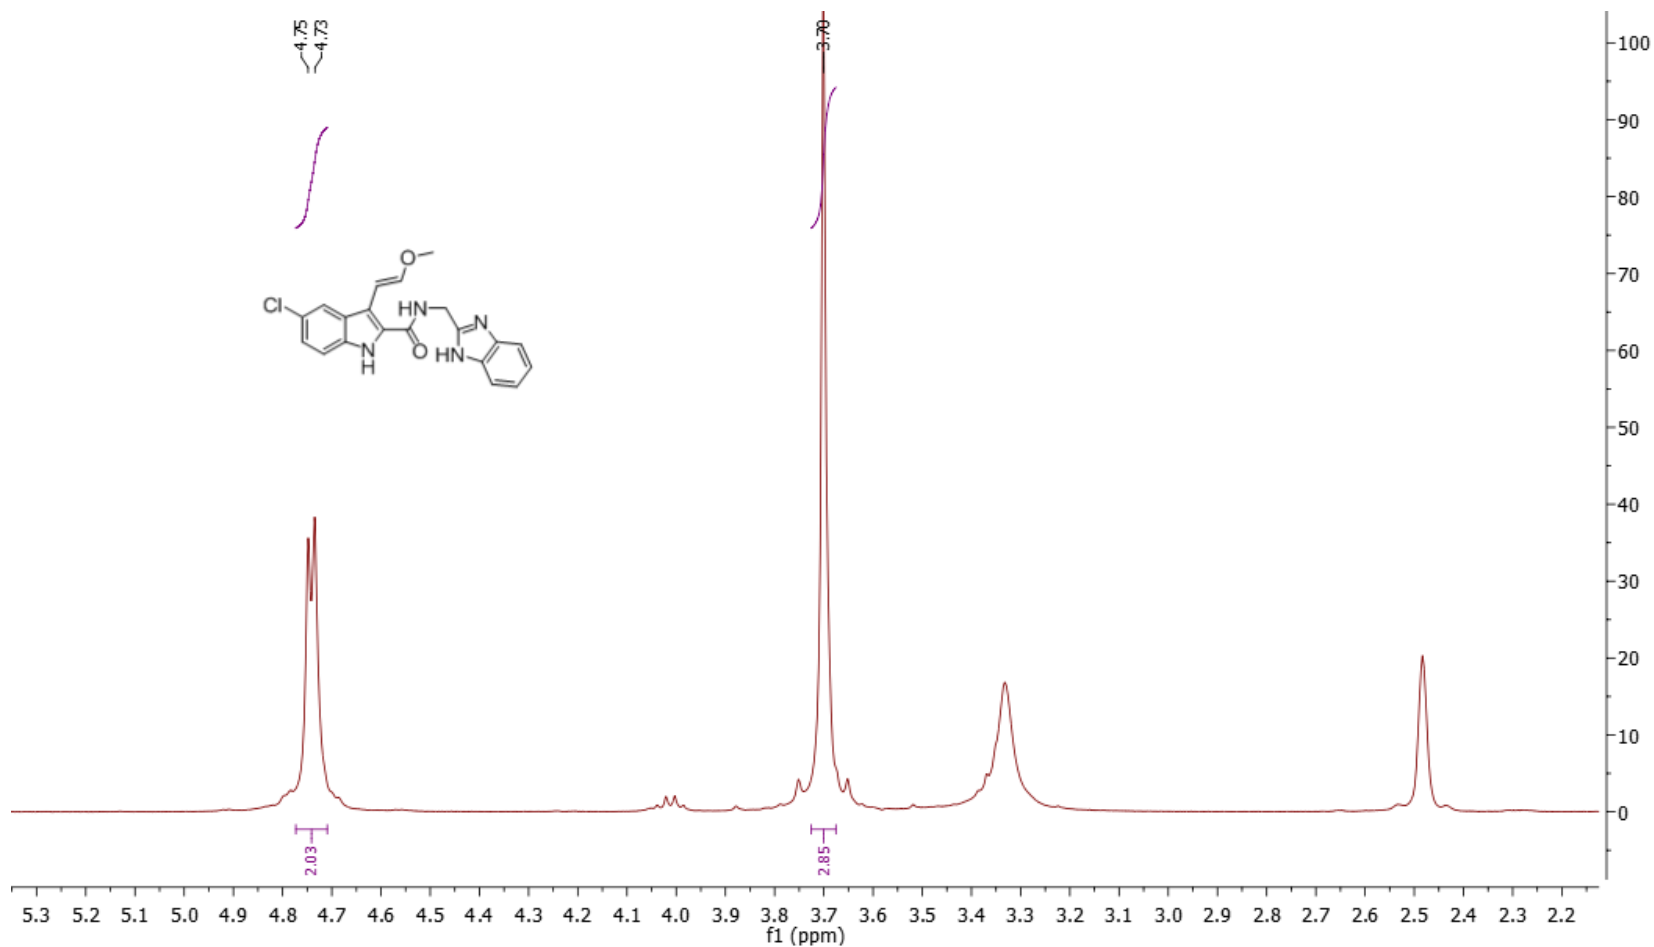

$^1\text{H}$  NMR (400 MHz,  $\text{DMSO}-d_6$ )  $\delta$  12.33 (s, 1H), 11.60 (s, 1H), 8.52 (t,  $J = 5.6$  Hz, 1H), 7.79 (s, 1H), 7.53 – 7.40 (m, 3H), 7.31 – 7.19 (m, 1H), 7.16- 7.12 (m, 2H), 6.54 (d,  $J = 13.2$  Hz, 1H), 4.74 (d,  $J = 5.6$  Hz, 2H), 3.70 (s, 3H).

# $^{13}\text{C}$ NMR spectrum of **6f**

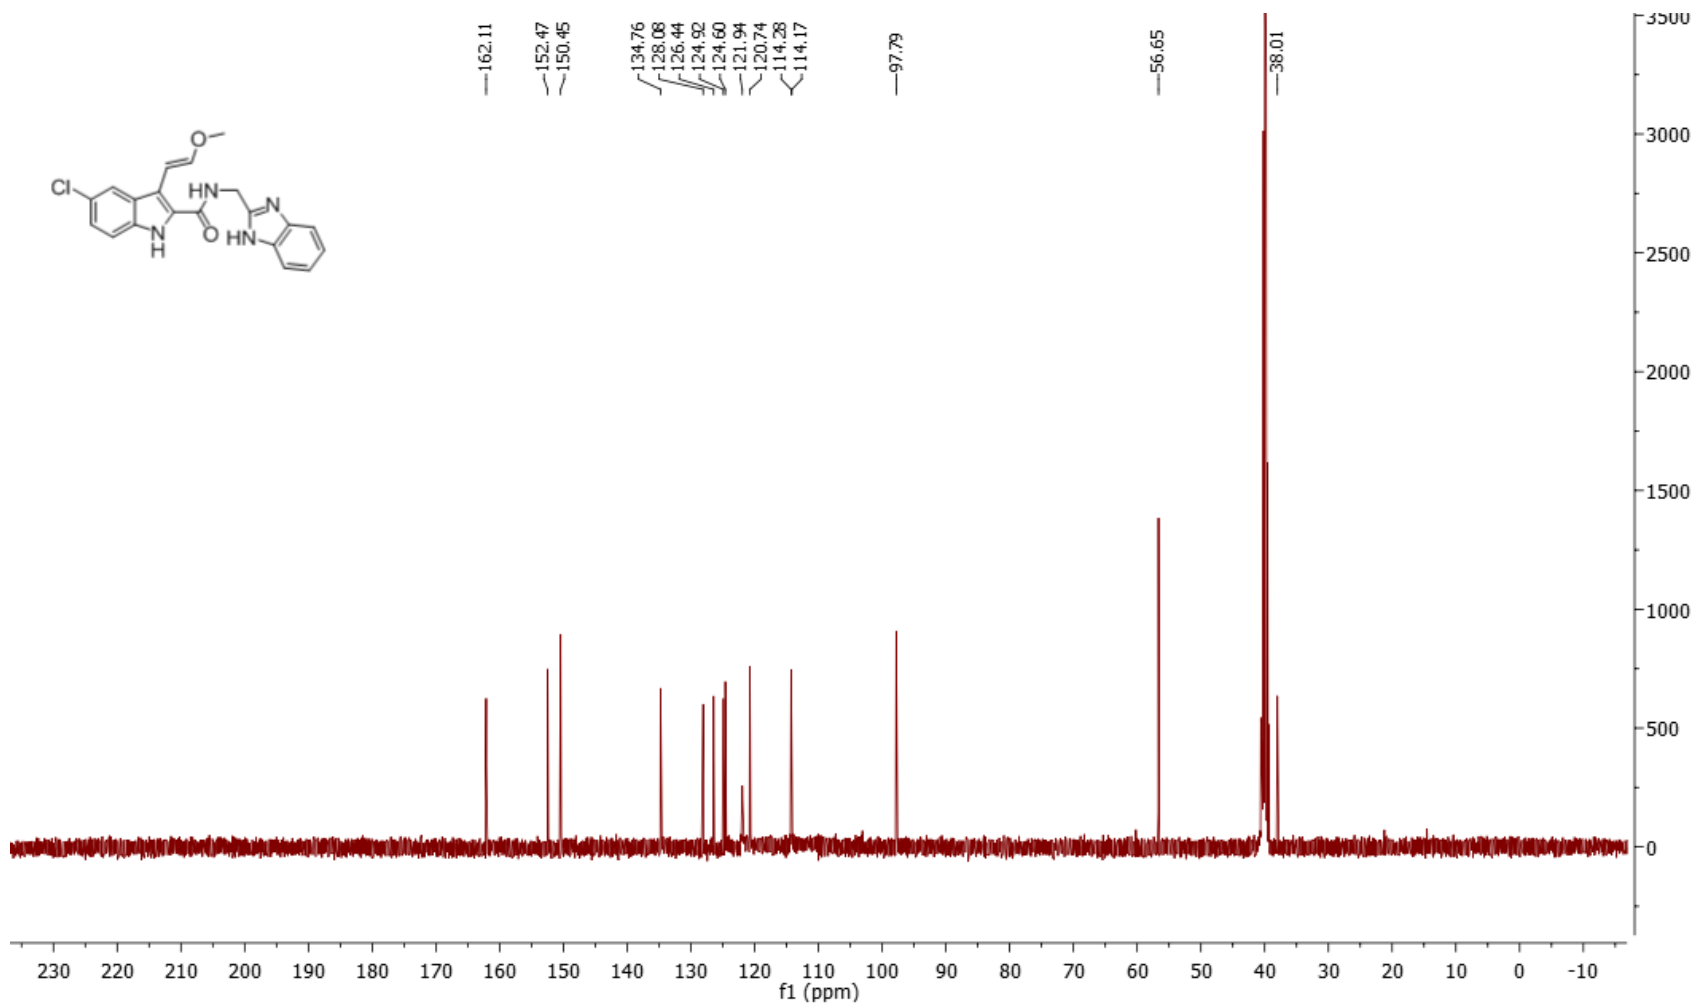

$^{13}\text{C}$  NMR (101 MHz, dmsol- $d_6$ )  $\delta$  162.11, 152.47, 150.45, 134.76, 128.08, 126.44, 124.92, 124.60, 121.94, 120.74, 114.28, 114.17, 97.79, 56.65, 38.01.

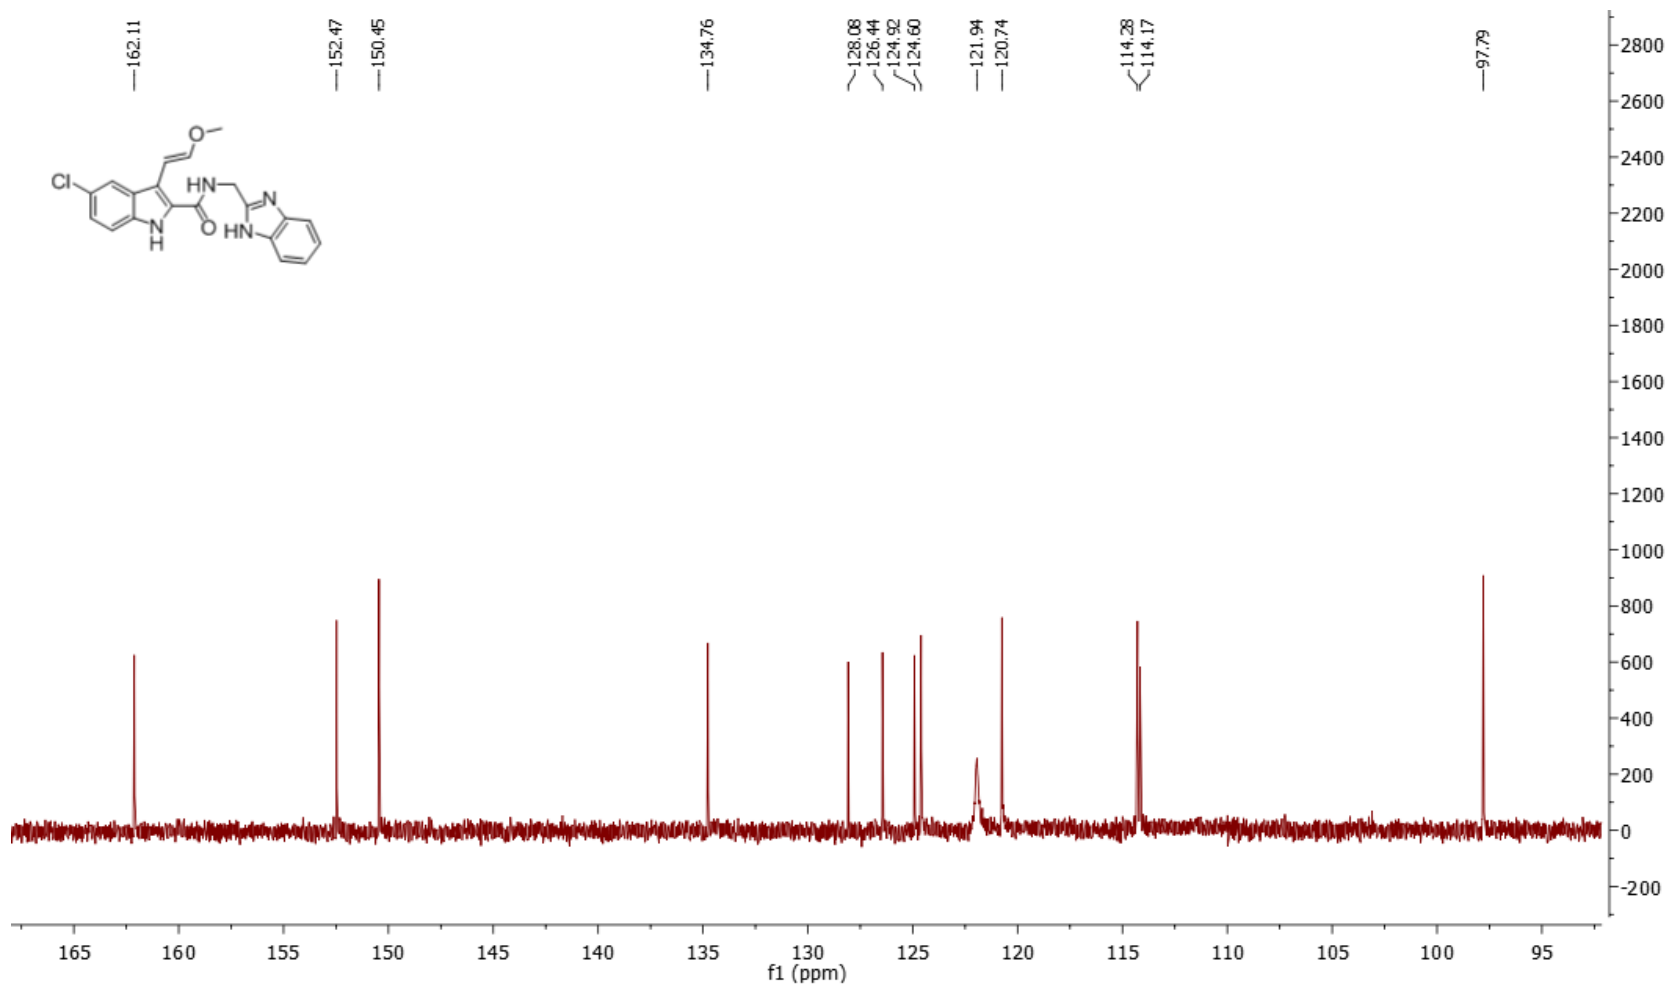

$^{13}\text{C}$  NMR (101 MHz, dms $\text{o}$ )  $\delta$  162.11, 152.47, 150.45, 134.76, 128.08, 126.44, 124.92, 124.60, 121.94, 120.74, 114.28, 114.17, 97.79, 56.65, 38.01.

# $^1\text{H}$ NMR Spectrum of **5b**

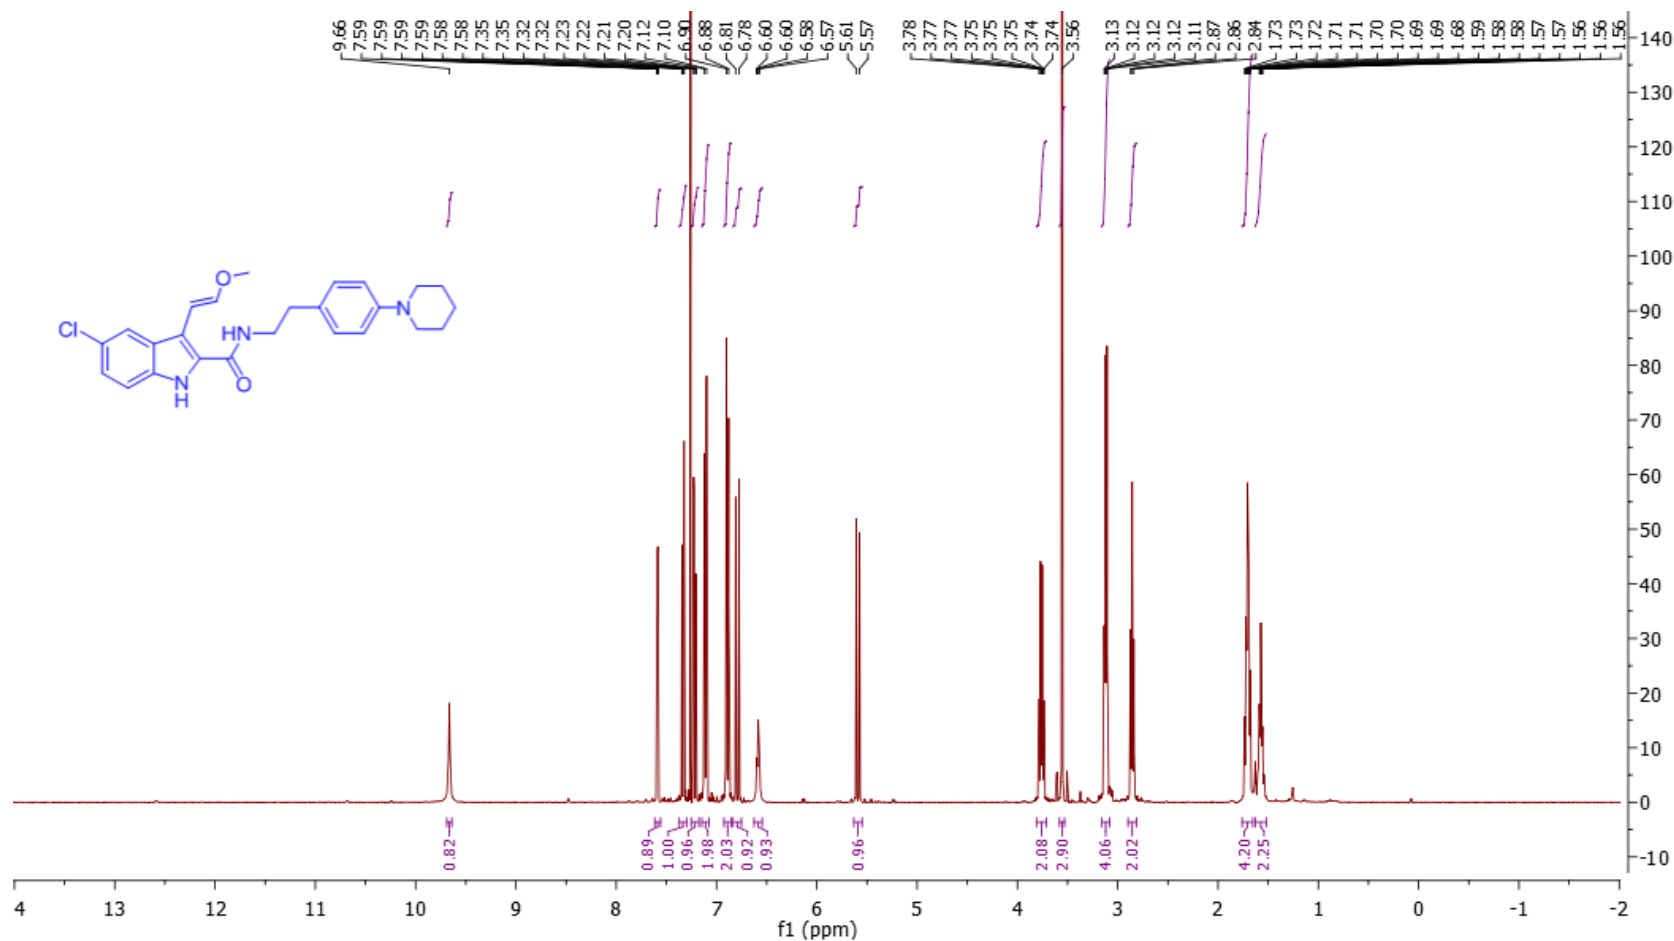

$^1\text{H}$  NMR (400 MHz, Chloroform- $d$ )  $\delta$  9.66 (s, 1H), 7.59 (d,  $J = 2.0$  Hz, 1H), 7.33 (d,  $J = 8.7$  Hz, 1H), 7.21 (dd,  $J = 8.7, 2.0$  Hz, 1H), 7.11 (d,  $J = 8.9$  Hz, 2H), 6.89 (d,  $J = 8.6$  Hz, 2H), 6.79 (d,  $J = 13.0$  Hz, 1H), 6.58 (t,  $J = 5.8$  Hz, 1H), 5.59 (d,  $J = 13.0$  Hz, 1H), 3.76 (q,  $J = 6.5$  Hz, 2H), 3.56 (s, 3H), 3.16 – 3.08 (m, 4H), 2.86 (t,  $J = 6.6$  Hz, 2H), 1.76 – 1.65 (m, 4H), 1.63 – 1.52 (m, 2H).

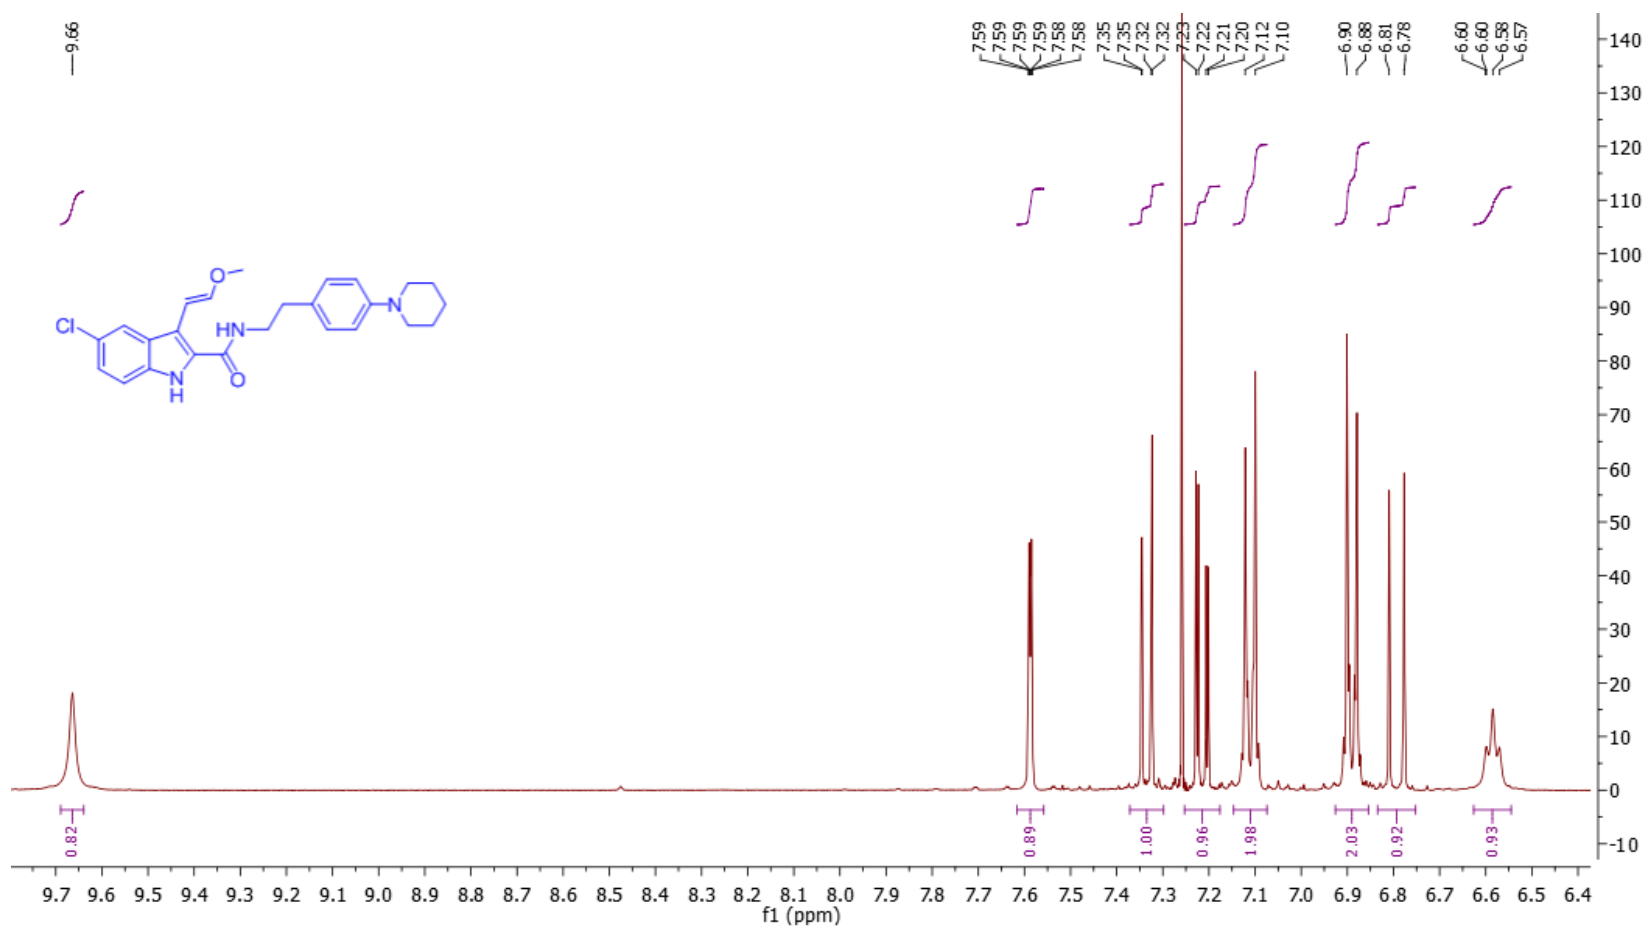

$^1\text{H}$  NMR (400 MHz, Chloroform-*d*)  $\delta$  9.66 (s, 1H), 7.59 (d,  $J = 2.0$  Hz, 1H), 7.33 (d,  $J = 8.7$  Hz, 1H), 7.21 (dd,  $J = 8.7, 2.0$  Hz, 1H), 7.11 (d,  $J = 8.9$  Hz, 2H), 6.89 (d,  $J = 8.6$  Hz, 2H), 6.79 (d,  $J = 13.0$  Hz, 1H), 6.58 (t,  $J = 5.8$  Hz, 1H), 5.59 (d,  $J = 13.0$  Hz, 1H), 3.76 (q,  $J = 6.5$  Hz, 2H), 3.56 (s, 3H), 3.16 – 3.08 (m, 4H), 2.86 (t,  $J = 6.6$  Hz, 2H), 1.76 – 1.65 (m, 4H), 1.63 – 1.52 (m, 2H).



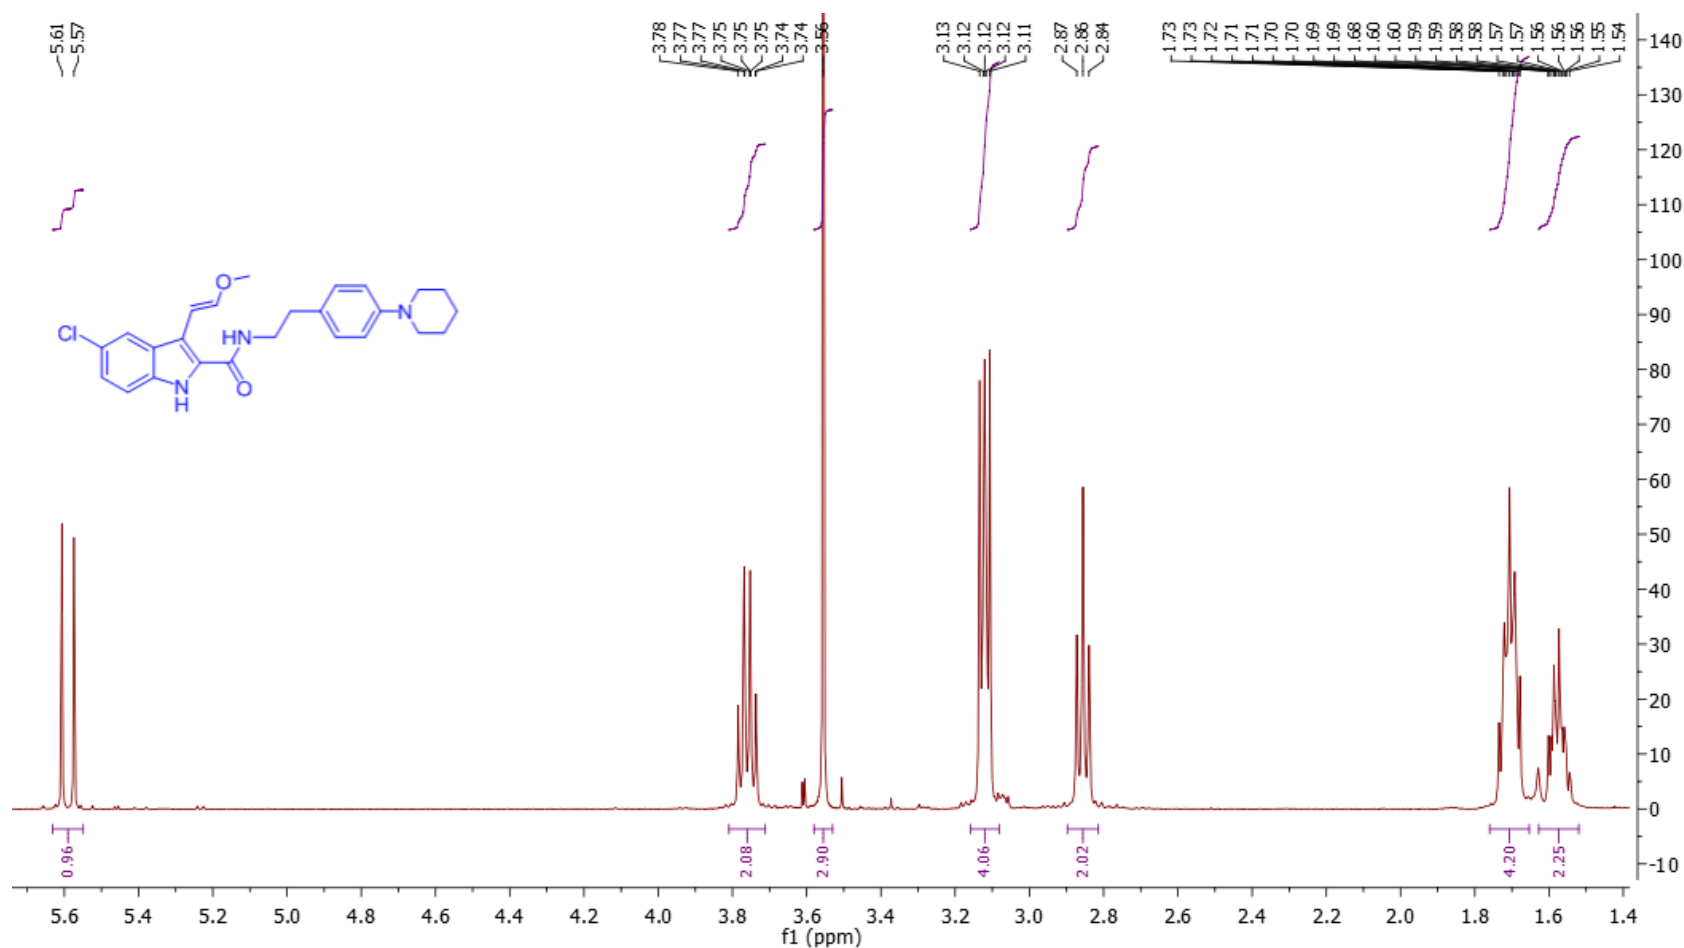

<sup>1</sup>H NMR (400 MHz, Chloroform-*d*) δ 9.66 (s, 1H), 7.59 (d, *J* = 2.0 Hz, 1H), 7.33 (d, *J* = 8.7 Hz, 1H), 7.21 (dd, *J* = 8.7, 2.0 Hz, 1H), 7.11 (d, *J* = 8.9 Hz, 2H), 6.89 (d, *J* = 8.6 Hz, 2H), 6.79 (d, *J* = 13.0 Hz, 1H), 6.58 (t, *J* = 5.8 Hz, 1H), 5.59 (d, *J* = 13.0 Hz, 1H), 3.76 (q, *J* = 6.5 Hz, 2H), 3.56 (s, 3H), 3.16 – 3.08 (m, 4H), 2.86 (t, *J* = 6.6 Hz, 2H), 1.76 – 1.65 (m, 4H), 1.63 – 1.52 (m, 2H).

# $^{13}\text{C}$ NMR Spectrum of **5b**

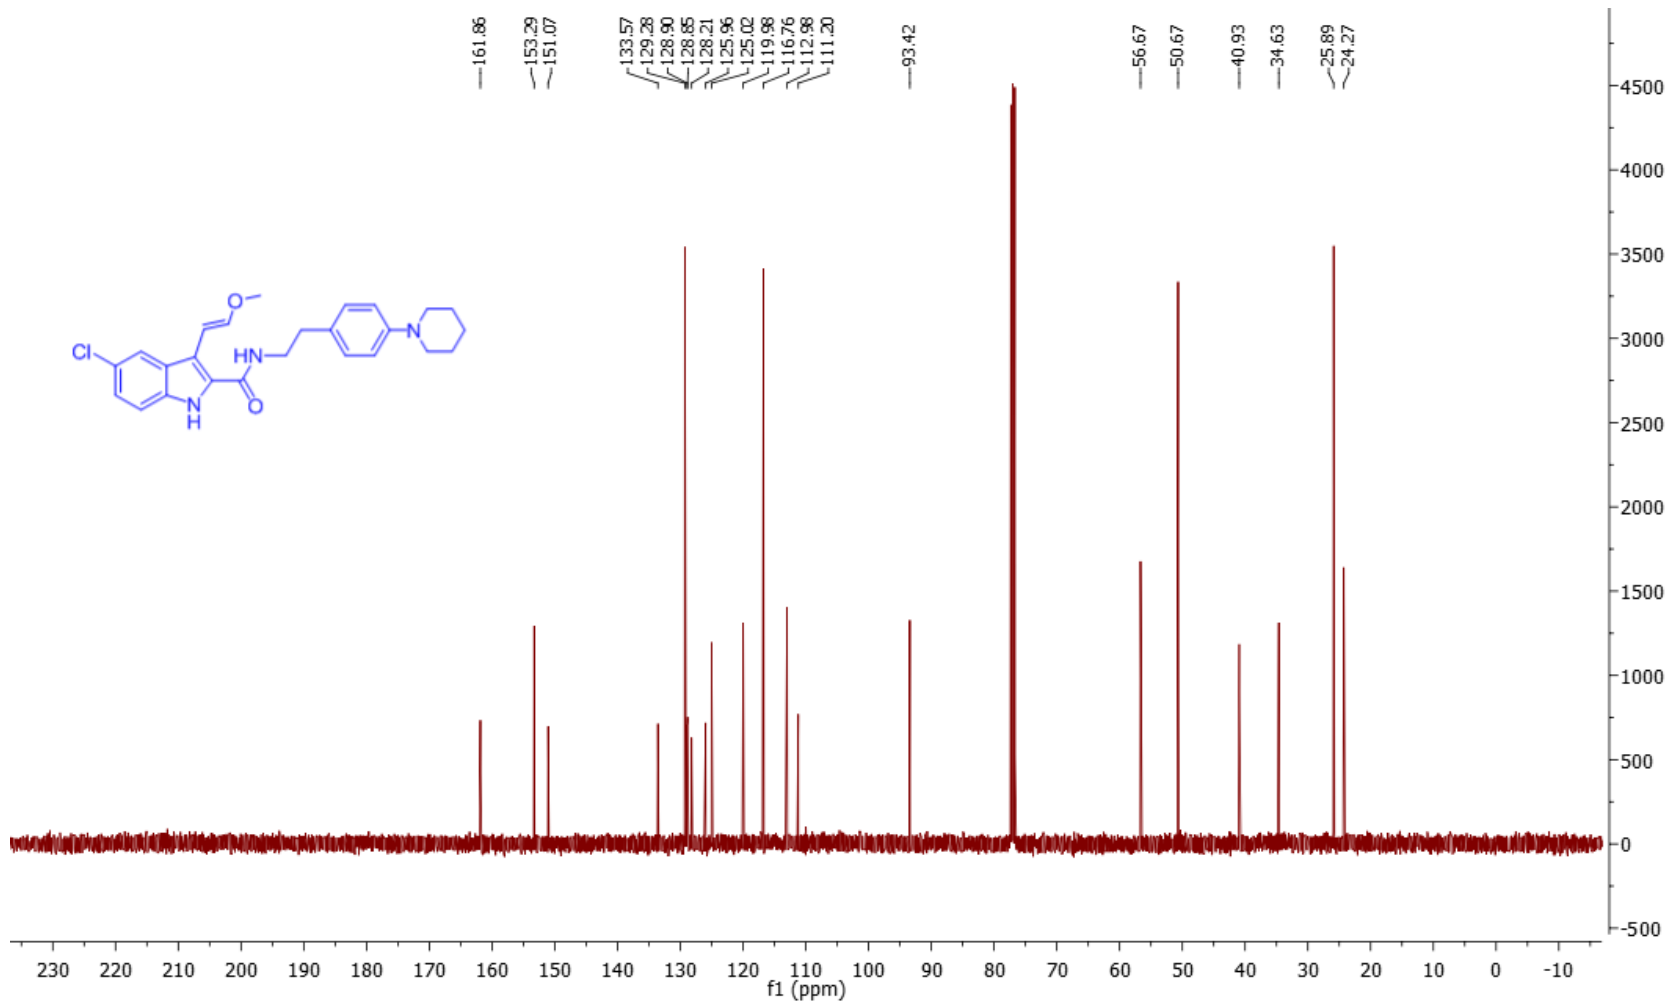

$^{13}\text{C}$  NMR (101 MHz,  $\text{cdCl}_3$ )  $\delta$  161.86, 153.29, 151.07, 133.57, 129.28, 128.90, 128.85, 128.21, 125.96, 125.02, 119.98, 116.76, 112.98, 111.20, 93.42, 56.67, 50.67, 40.93, 34.63, 25.89, 24.27.

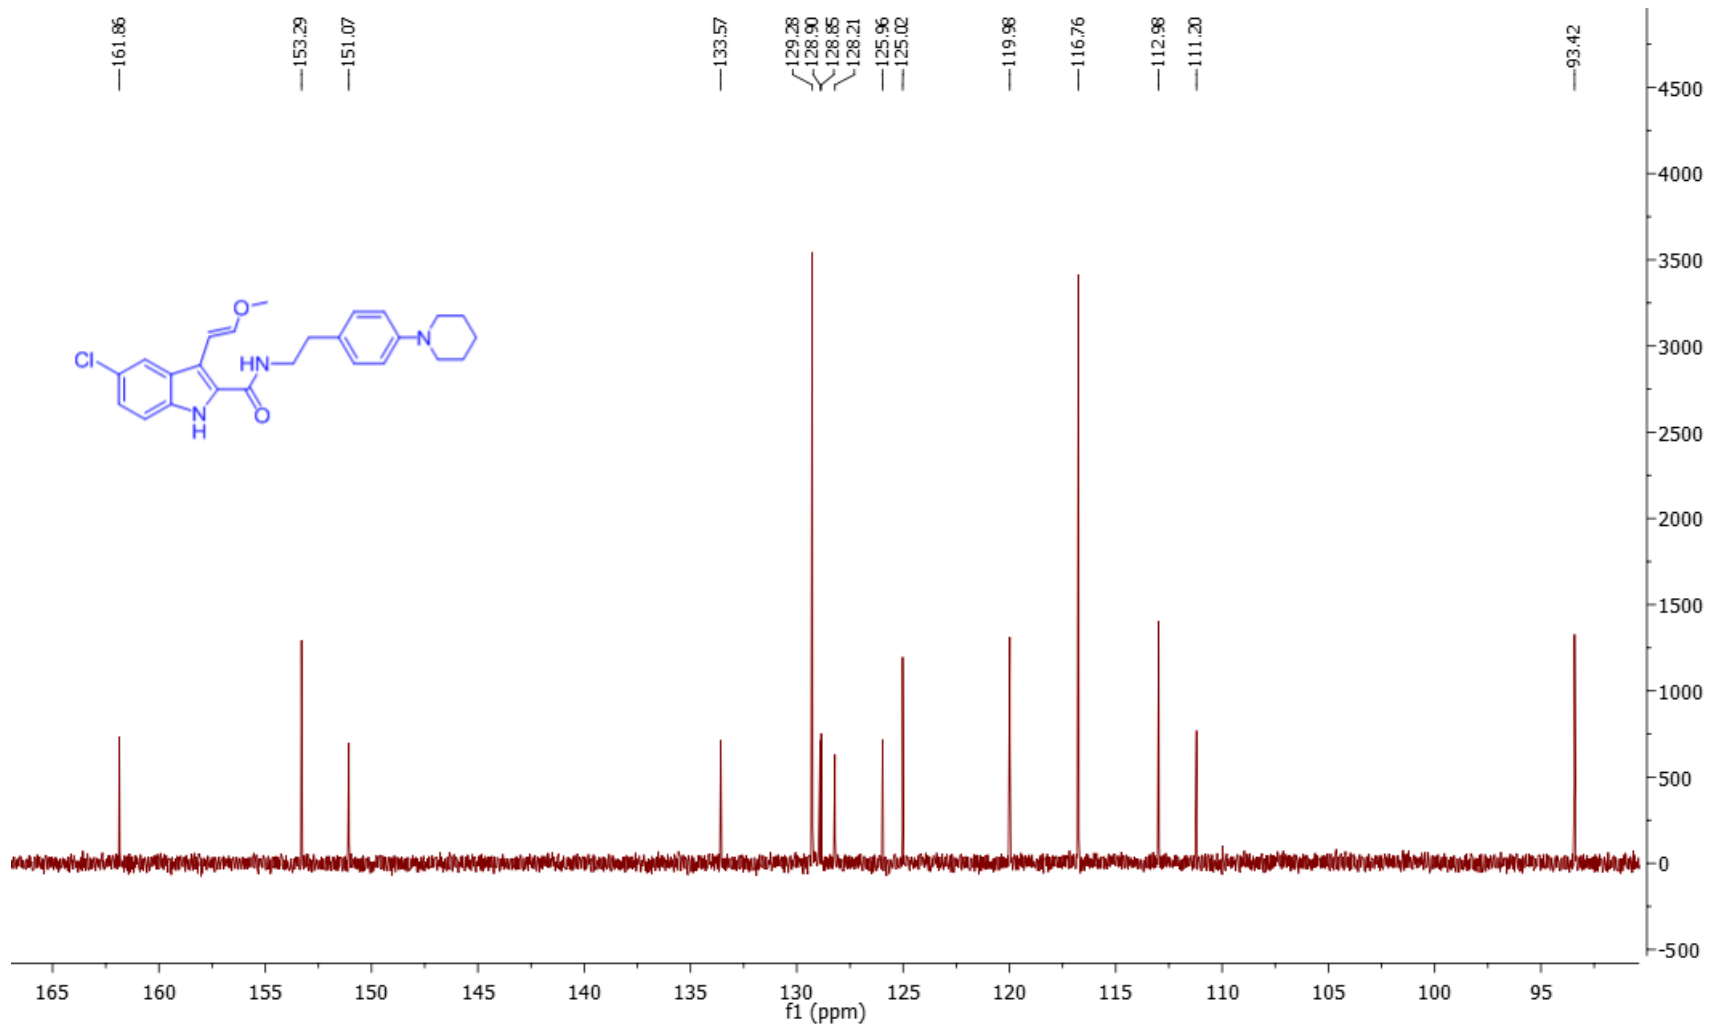

$^{13}\text{C}$  NMR (101 MHz,  $\text{cdCl}_3$ )  $\delta$  161.86, 153.29, 151.07, 133.57, 129.28, 128.90, 128.85, 128.21, 125.96, 125.02, 119.98, 116.76, 112.98, 111.20, 93.42, 56.67, 50.67, 40.93, 34.63, 25.89, 24.27.

# $^1\text{H}$ NMR spectrum of **5c**

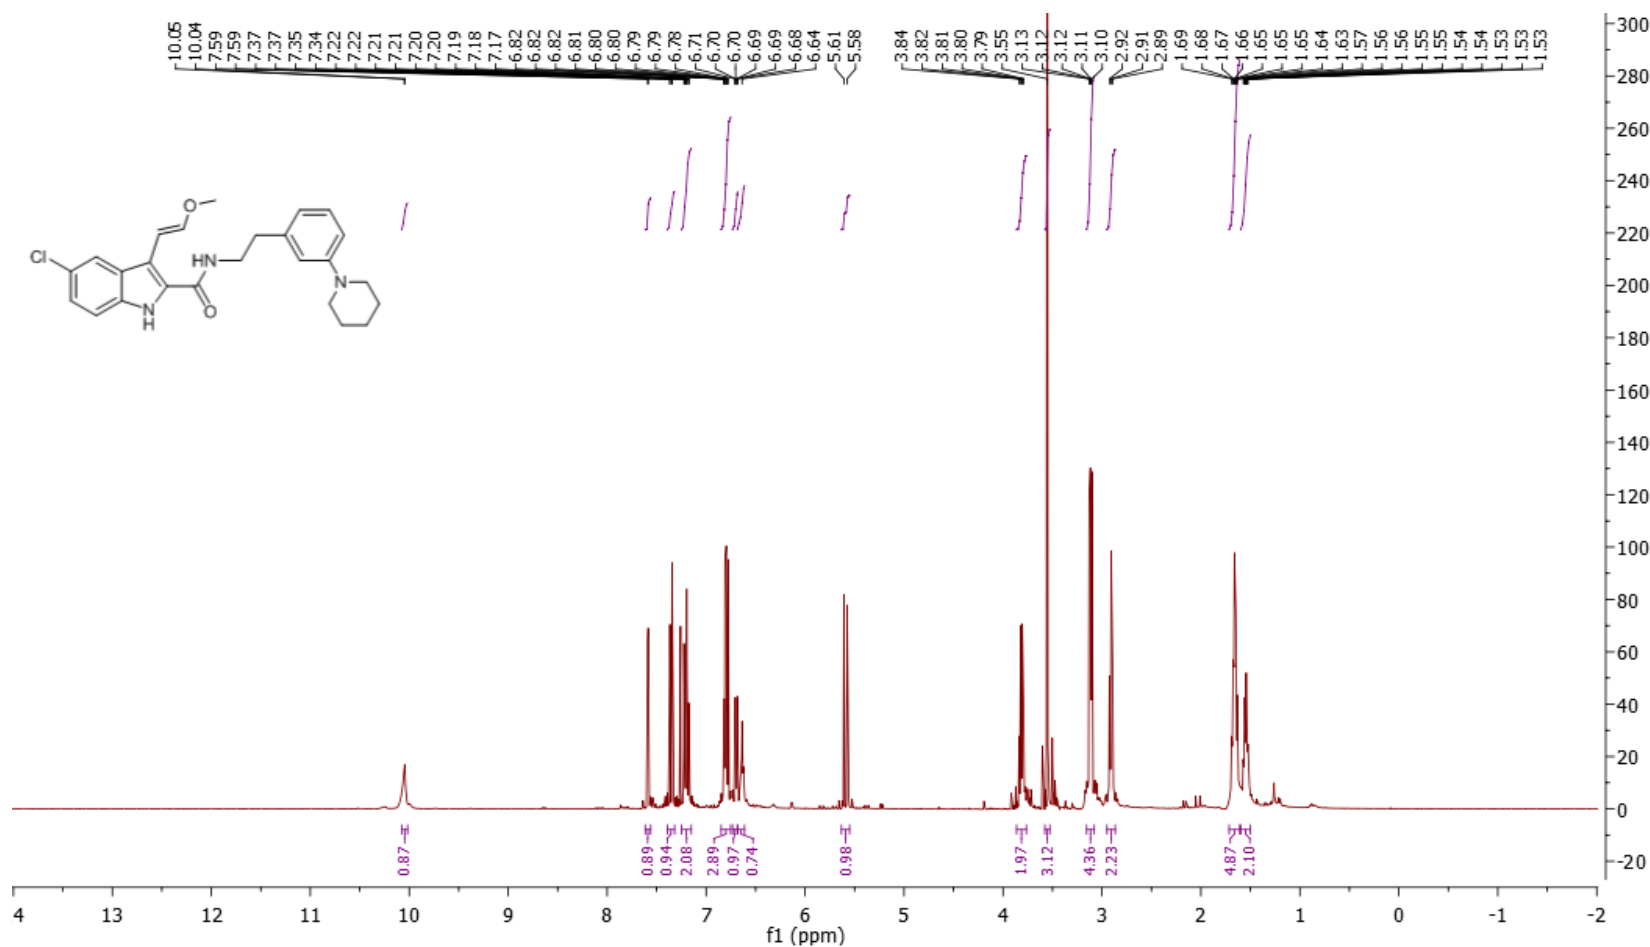

$^1\text{H}$  NMR (400 MHz, Chloroform-*d*)  $\delta$  10.05 (s, 1H), 7.59 (d,  $J = 2.0$  Hz, 1H), 7.36 (d,  $J = 8.7$  Hz, 1H), 7.25 – 7.15 (m, 2H), 6.85 – 6.75 (m, 3H), 6.70 (d,  $J = 7.5$  Hz, 1H), 6.66 (s, 1H), 5.59 (d,  $J = 13.0$  Hz, 1H), 3.81 (q,  $J = 6.7$  Hz, 2H), 3.55 (s, 3H), 3.15 – 3.08 (m, 4H), 2.91 (t,  $J = 6.7$  Hz, 2H), 1.71 – 1.61 (m, 4H), 1.60 – 1.50 (m, 2H).

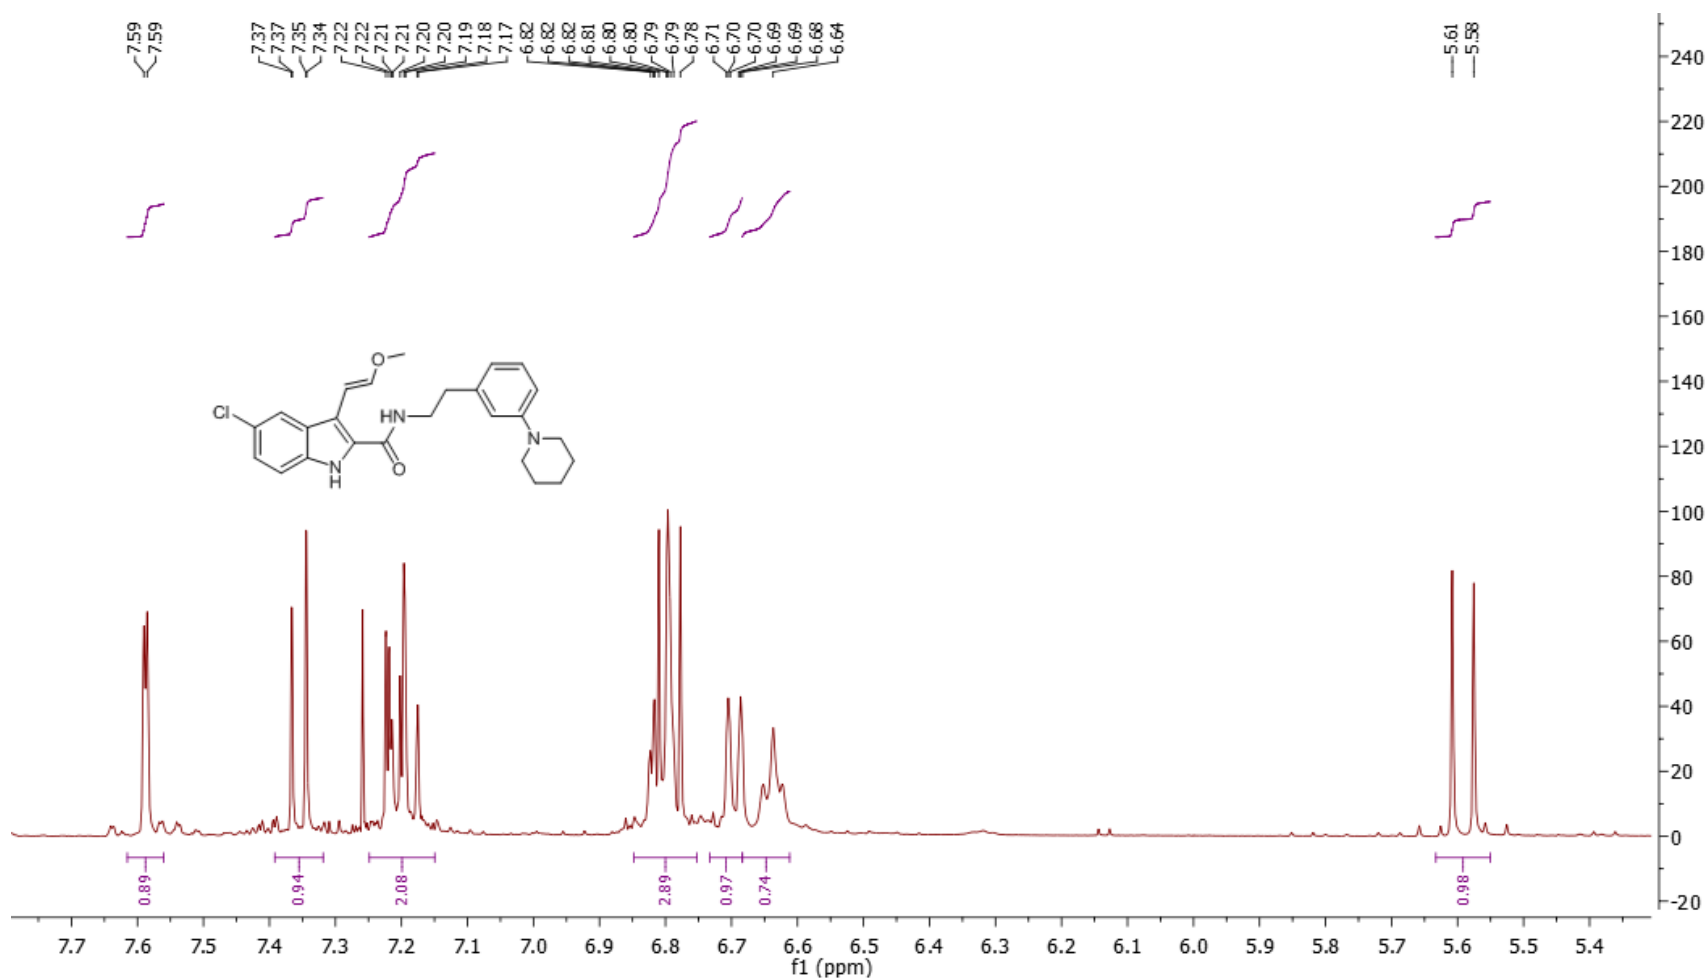

<sup>1</sup>H NMR (400 MHz, Chloroform-*d*) δ 10.05 (s, 1H), 7.59 (d, *J* = 2.0 Hz, 1H), 7.36 (d, *J* = 8.7 Hz, 1H), 7.25 – 7.15 (m, 2H), 6.85 – 6.75 (m, 3H), 6.70 (d, *J* = 7.5 Hz, 1H), 6.66 (s, 1H), 5.59 (d, *J* = 13.0 Hz, 1H), 3.81 (q, *J* = 6.7 Hz, 2H), 3.55 (s, 3H), 3.15 – 3.08 (m, 4H), 2.91 (t, *J* = 6.7 Hz, 2H), 1.71 – 1.61 (m, 4H), 1.60 – 1.50 (m, 2H).

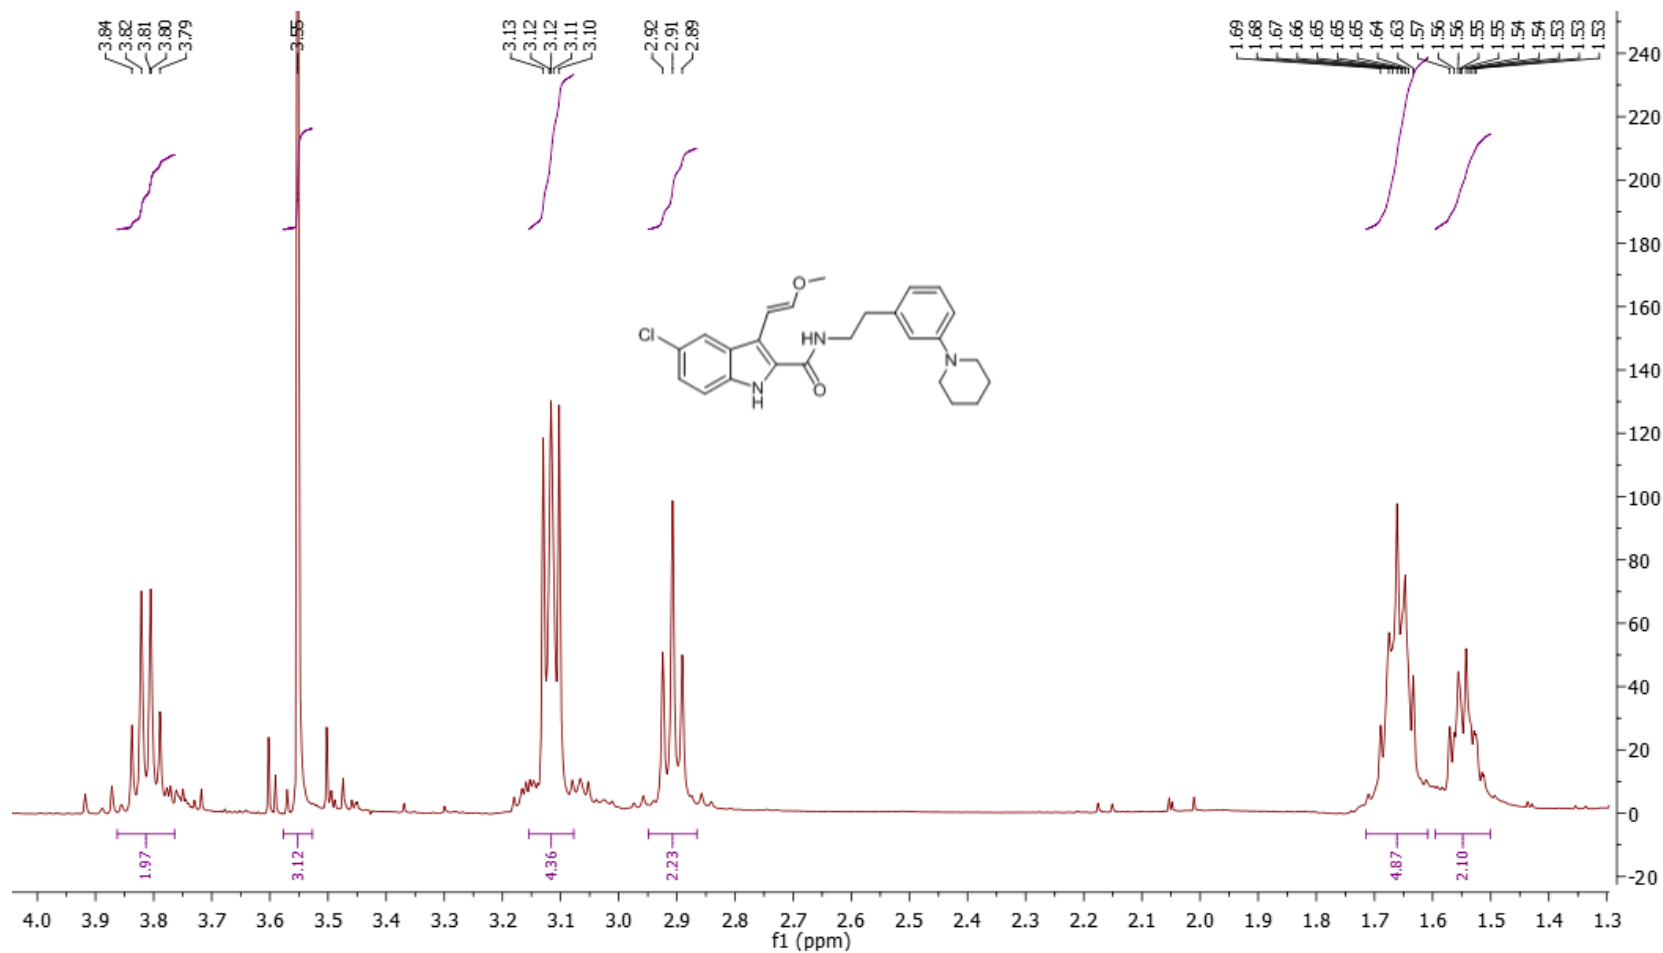

<sup>1</sup>H NMR (400 MHz, Chloroform-*d*) δ 10.05 (s, 1H), 7.59 (d, *J* = 2.0 Hz, 1H), 7.36 (d, *J* = 8.7 Hz, 1H), 7.25 – 7.15 (m, 2H), 6.85 – 6.75 (m, 3H), 6.70 (d, *J* = 7.5 Hz, 1H), 6.66 (s, 1H), 5.59 (d, *J* = 13.0 Hz, 1H), 3.81 (q, *J* = 6.7 Hz, 2H), 3.55 (s, 3H), 3.15 – 3.08 (m, 4H), 2.91 (t, *J* = 6.7 Hz, 2H), 1.71 – 1.61 (m, 4H), 1.60 – 1.50 (m, 2H).

# $^{13}\text{C}$ NMR spectrum of **5c**

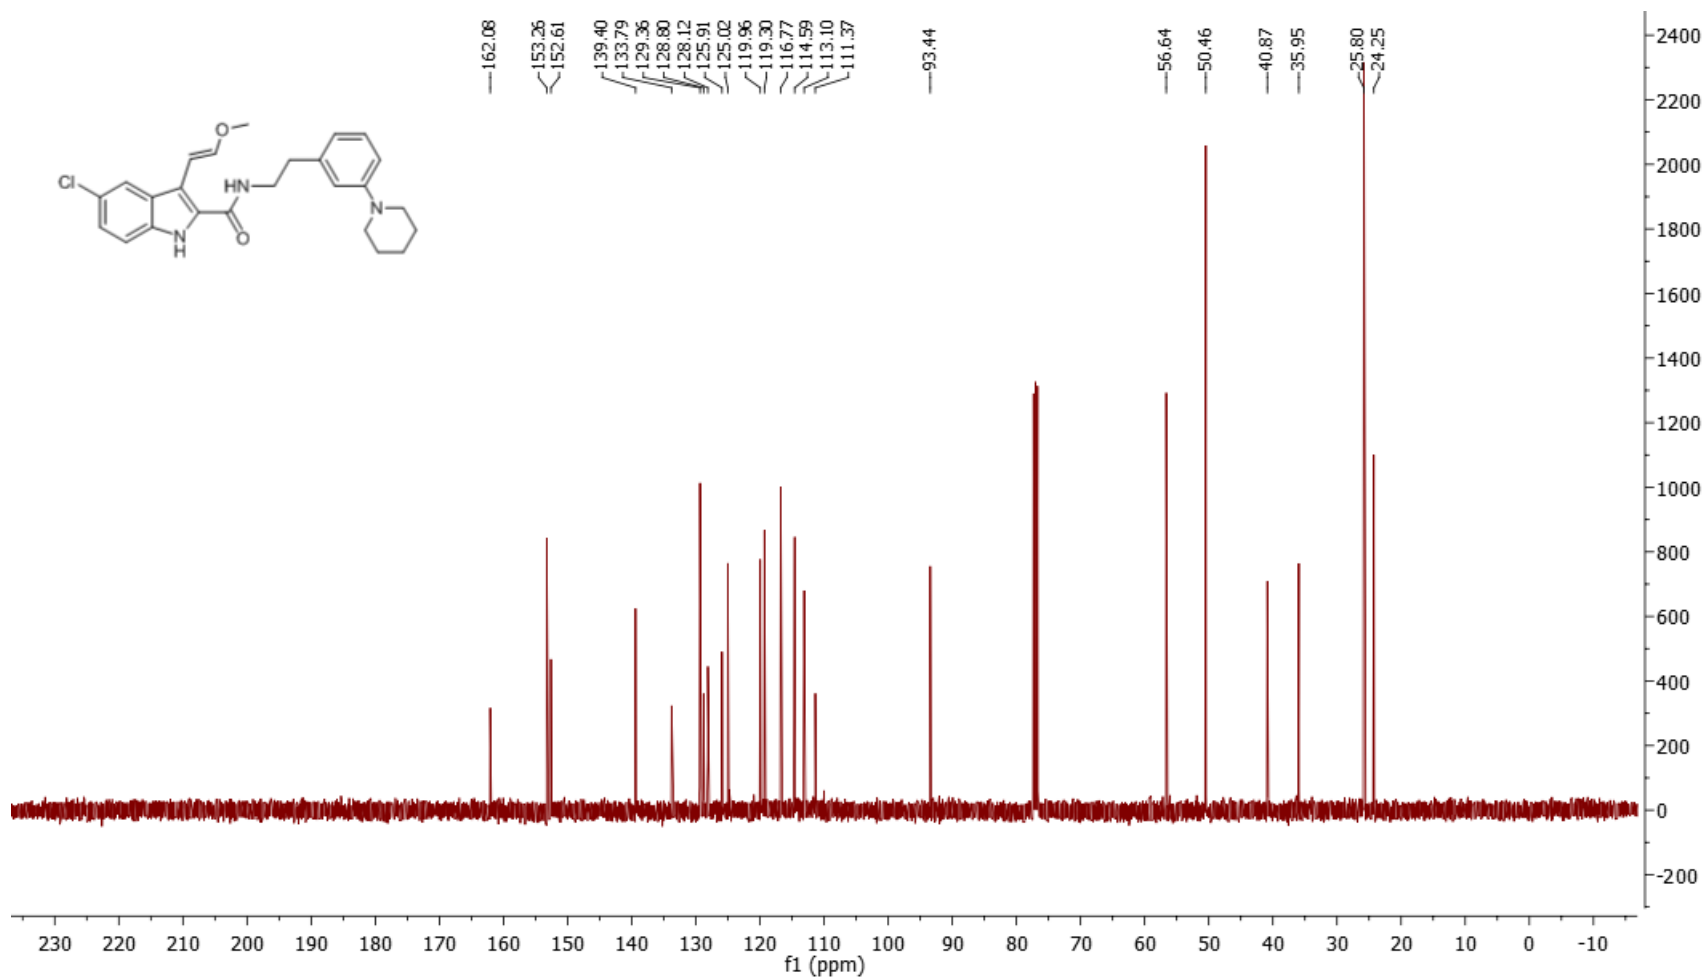

$^{13}\text{C}$  NMR (101 MHz,  $\text{CDCl}_3$ )  $\delta$  162.08, 153.26, 152.61, 139.40, 133.79, 129.36, 128.80, 128.12, 125.91, 125.02, 119.96, 119.30, 116.77, 114.59, 113.10, 111.37, 93.44, 56.64, 50.46, 40.87, 35.95, 25.80, 24.25.

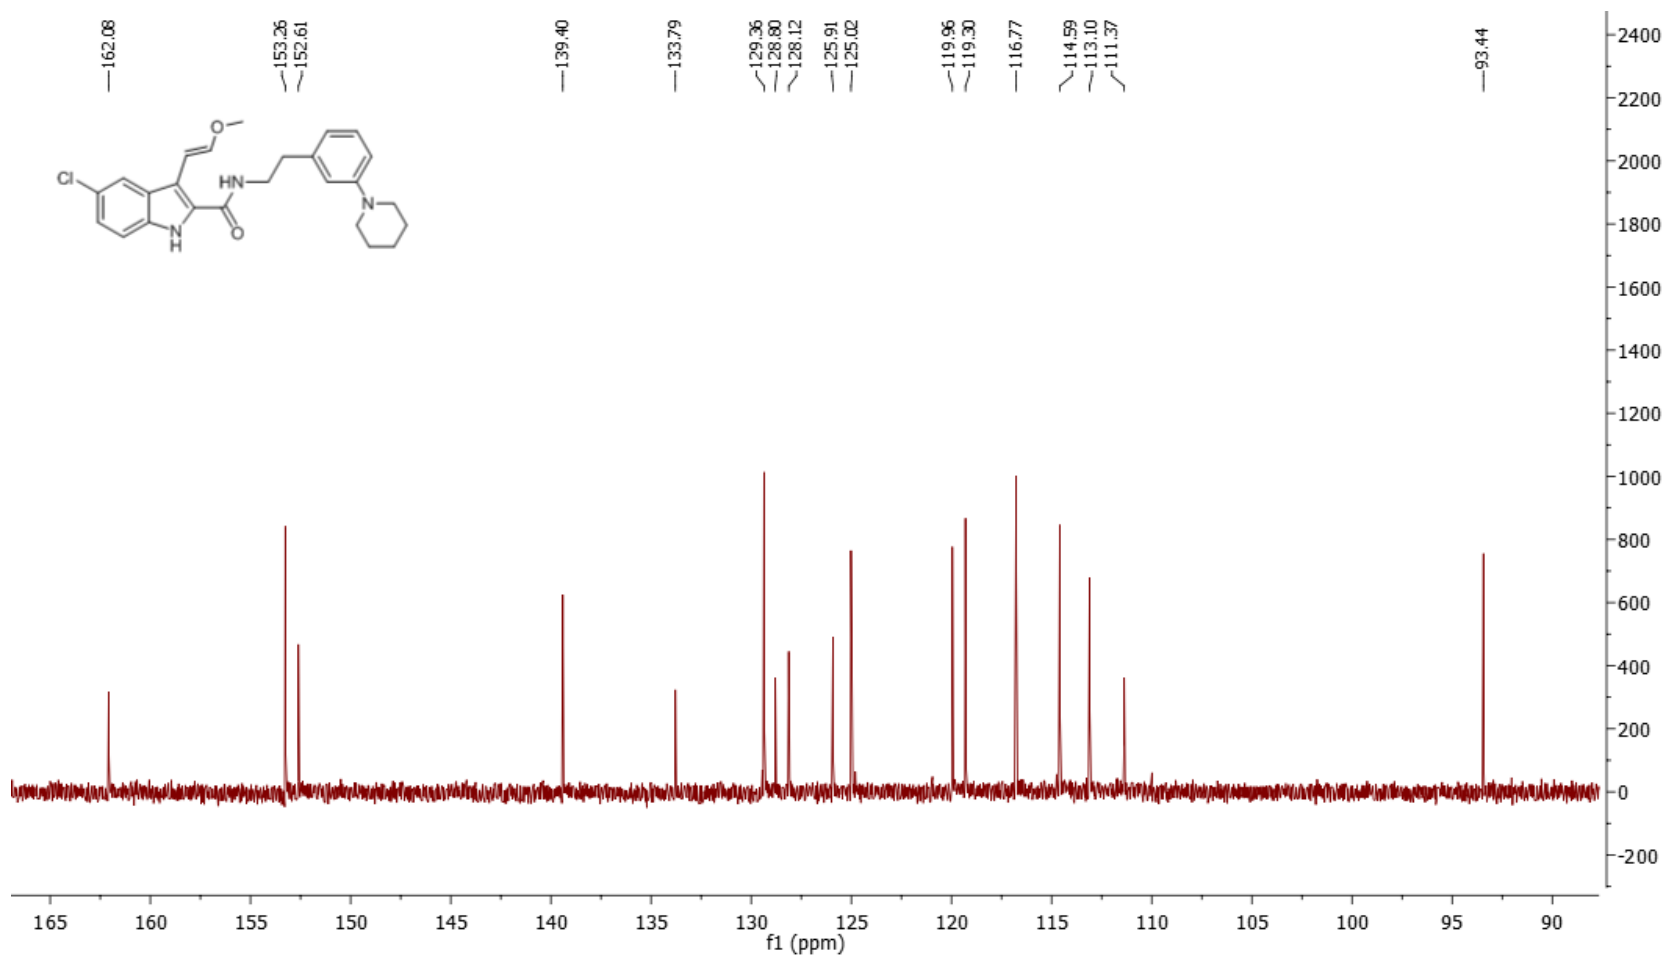

$^{13}\text{C}$  NMR (101 MHz,  $\text{cdCl}_3$ )  $\delta$  162.08, 153.26, 152.61, 139.40, 133.79, 129.36, 128.80, 128.12, 125.91, 125.02, 119.96, 119.30, 116.77, 114.59, 113.10, 111.37, 93.44, 56.64, 50.46, 40.87, 35.95, 25.80, 24.25.



# $^1\text{H}$ NMR spectrum of 5d

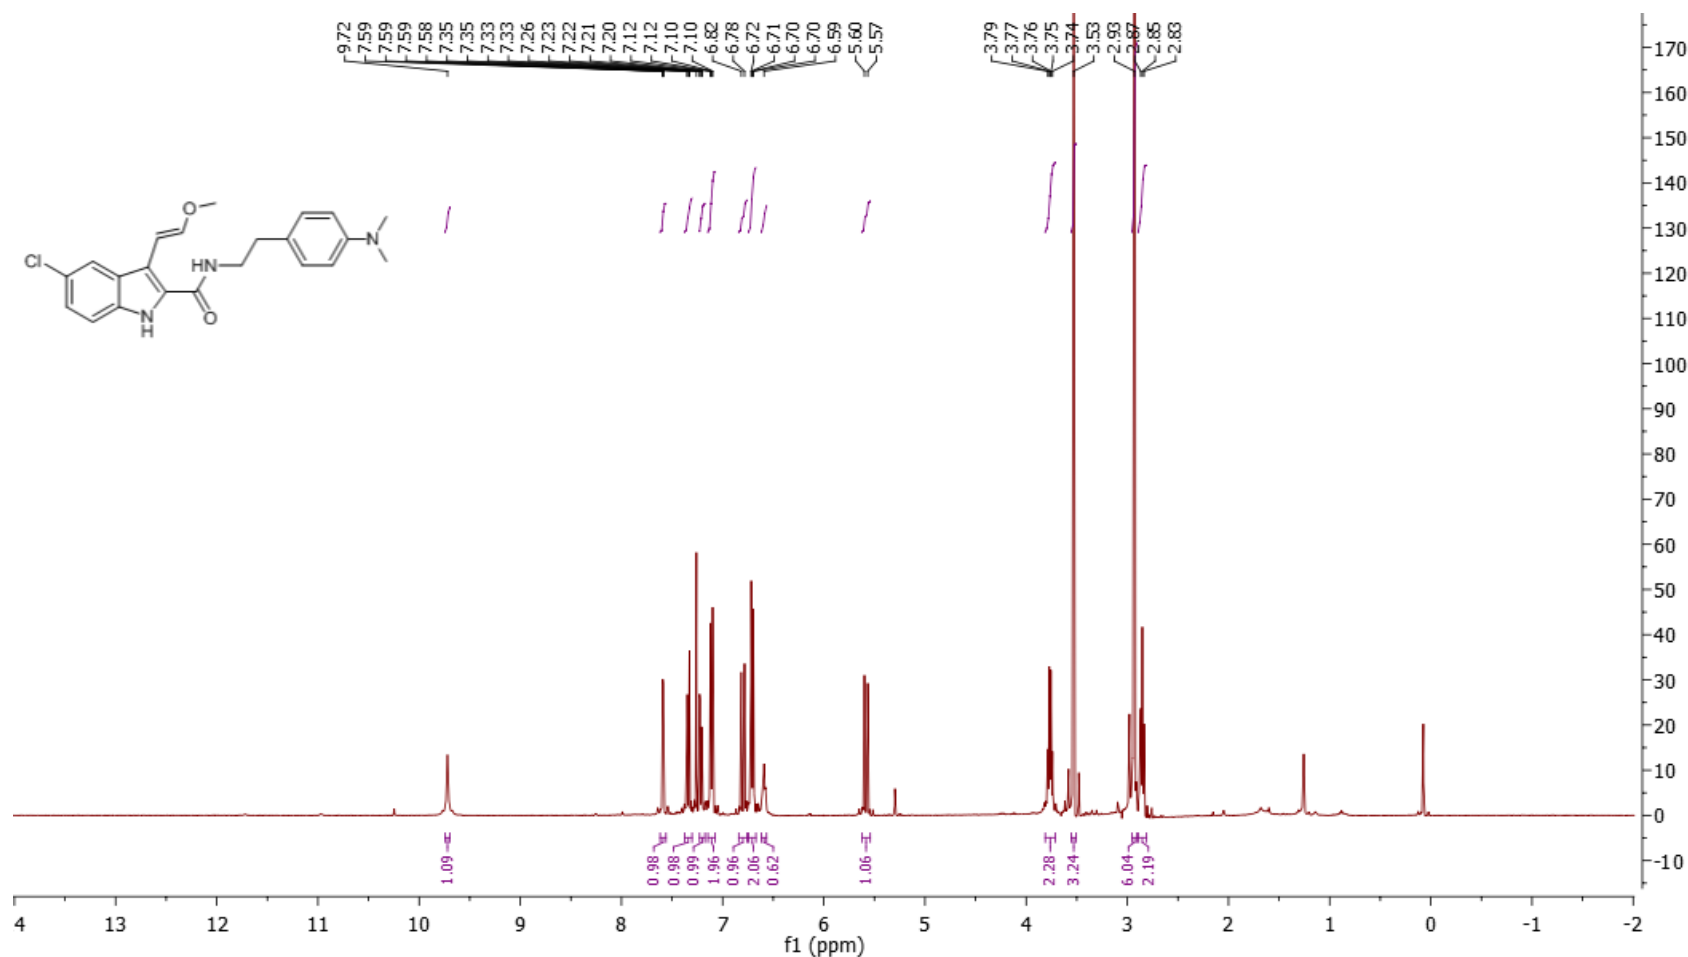

$^1\text{H}$  NMR (400 MHz, Chloroform- $d$ )  $\delta$  9.72 (s, 1H), 7.59 (s, 1H), 7.34 (d,  $J$  = 8.7, Hz, 1H), 7.21 (dd,  $J$  = 8.7, 2.0 Hz, 1H), 7.11 (d,  $J$  = 8.5 Hz, 2H), 6.80 (d,  $J$  = 13.0 Hz, 1H), 6.71 (d,  $J$  = 8.5 Hz, 2H), 6.59 (s, 1H), 5.58 (d,  $J$  = 13.0 Hz, 1H), 3.76 (q,  $J$  = 66 Hz, 2H), 3.53 (s, 3H), 2.93 (s, 6H), 2.85 (t,  $J$  = 6.6 Hz, 2H).

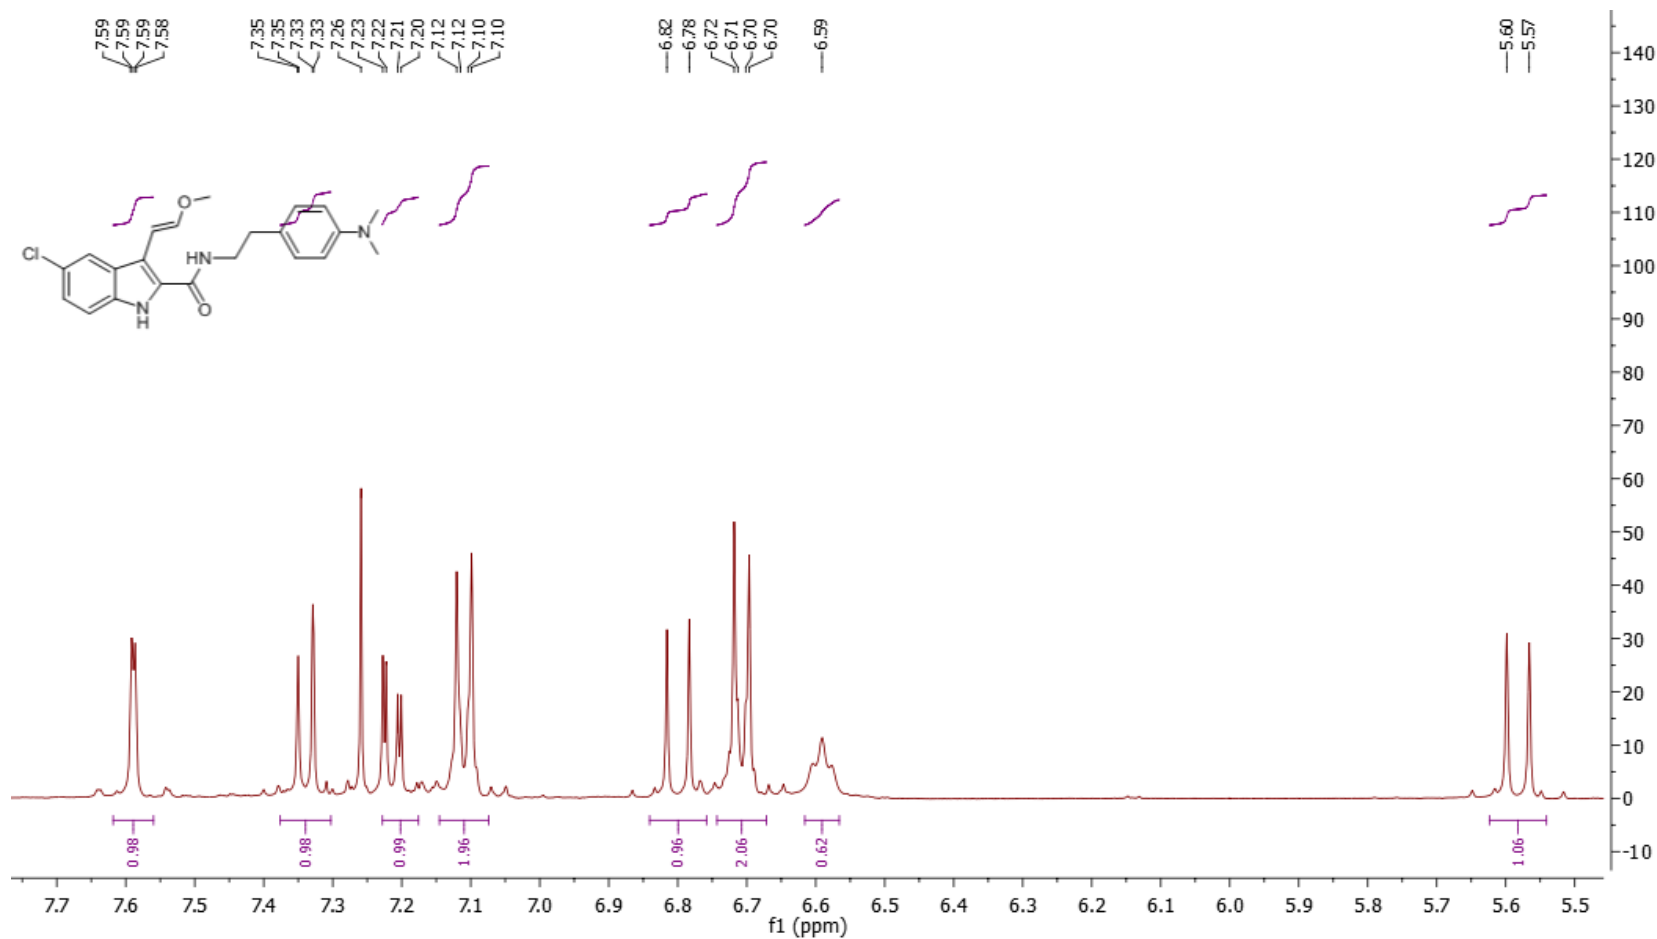

$^1\text{H NMR}$  (400 MHz, Chloroform-*d*)  $\delta$  9.72 (s, 1H), 7.59 (s, 1H), 7.34 (d,  $J = 8.7$ , Hz, 1H), 7.21 (dd,  $J = 8.7$ , 2.0 Hz, 1H), 7.11 (d,  $J = 8.5$  Hz, 2H), 6.80 (d,  $J = 13.0$  Hz, 1H), 6.71 (d,  $J = 8.5$  Hz, 2H), 6.59 (s, 1H), 5.58 (d,  $J = 13.0$  Hz, 1H), 3.76 (q,  $J = 66$  Hz, 2H), 3.53 (s, 3H), 2.93 (s, 6H), 2.85 (t,  $J = 6.6$  Hz, 2H).

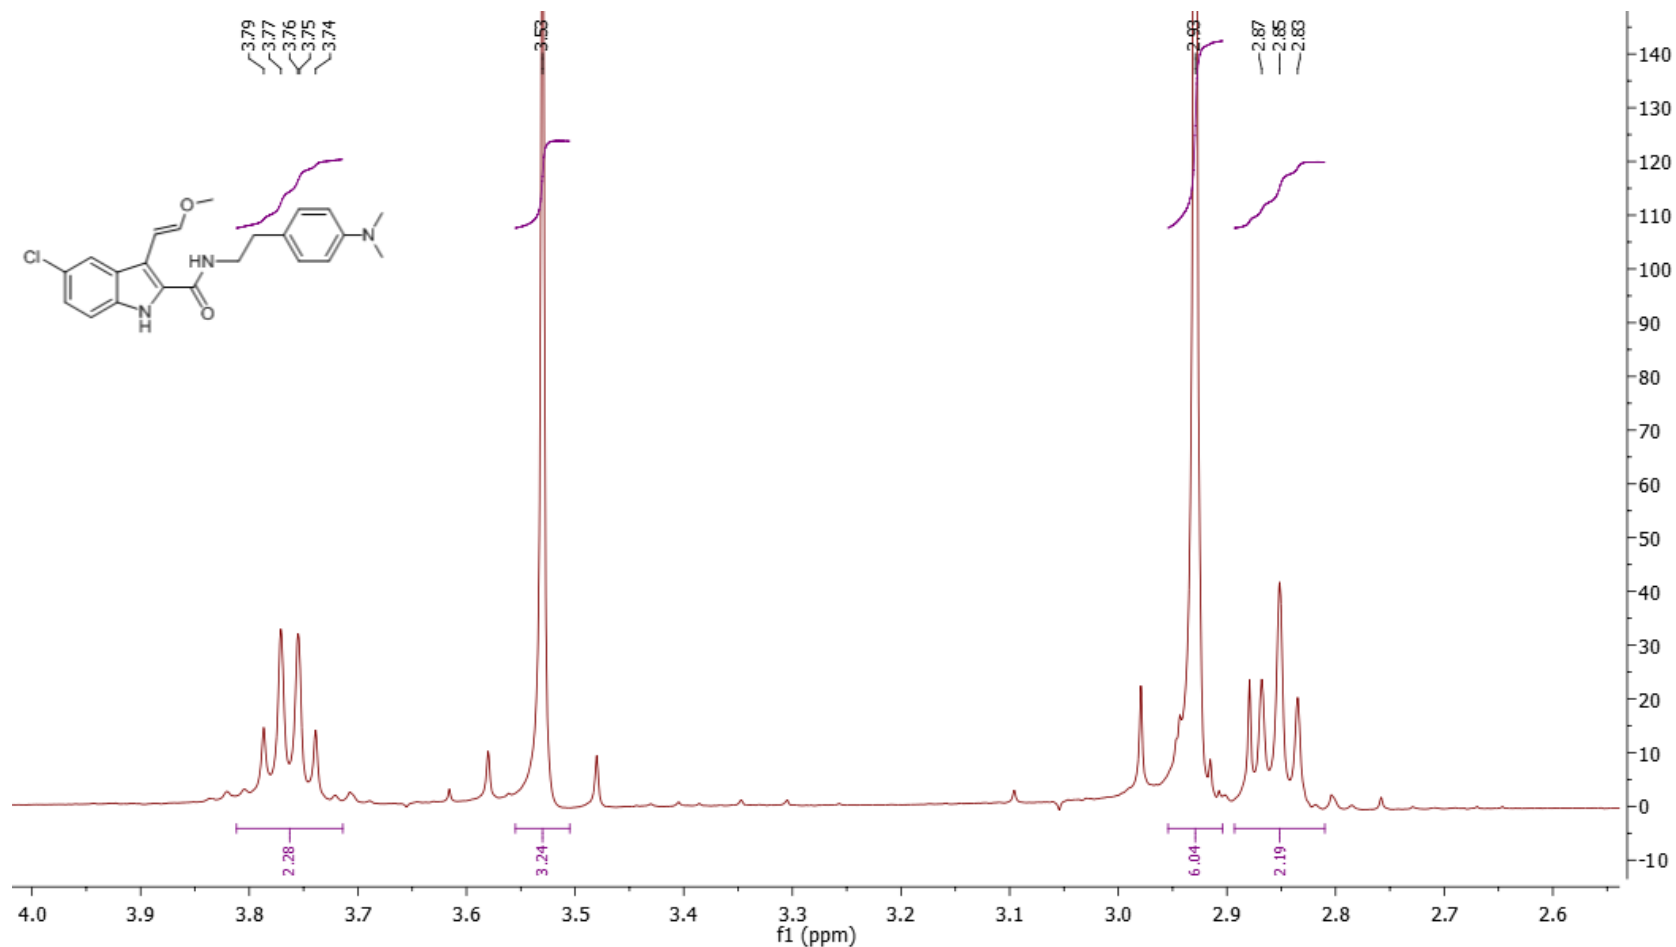

<sup>1</sup>H NMR (400 MHz, Chloroform-*d*)  $\delta$  9.72 (s, 1H), 7.59 (s, 1H), 7.34 (d,  $J = 8.7$ , Hz, 1H), 7.21 (dd,  $J = 8.7, 2.0$  Hz, 1H), 7.11 (d,  $J = 8.5$  Hz, 2H), 6.80 (d,  $J = 13.0$  Hz, 1H), 6.71 (d,  $J = 8.5$  Hz, 2H), 6.59 (s, 1H), 5.58 (d,  $J = 13.0$  Hz, 1H), 3.76 (q,  $J = 66$  Hz, 2H), 3.53 (s, 3H), 2.93 (s, 6H), 2.85 (t,  $J = 6.6$  Hz, 2H).

# $^{13}\text{C}$ NMR spectrum of 5d

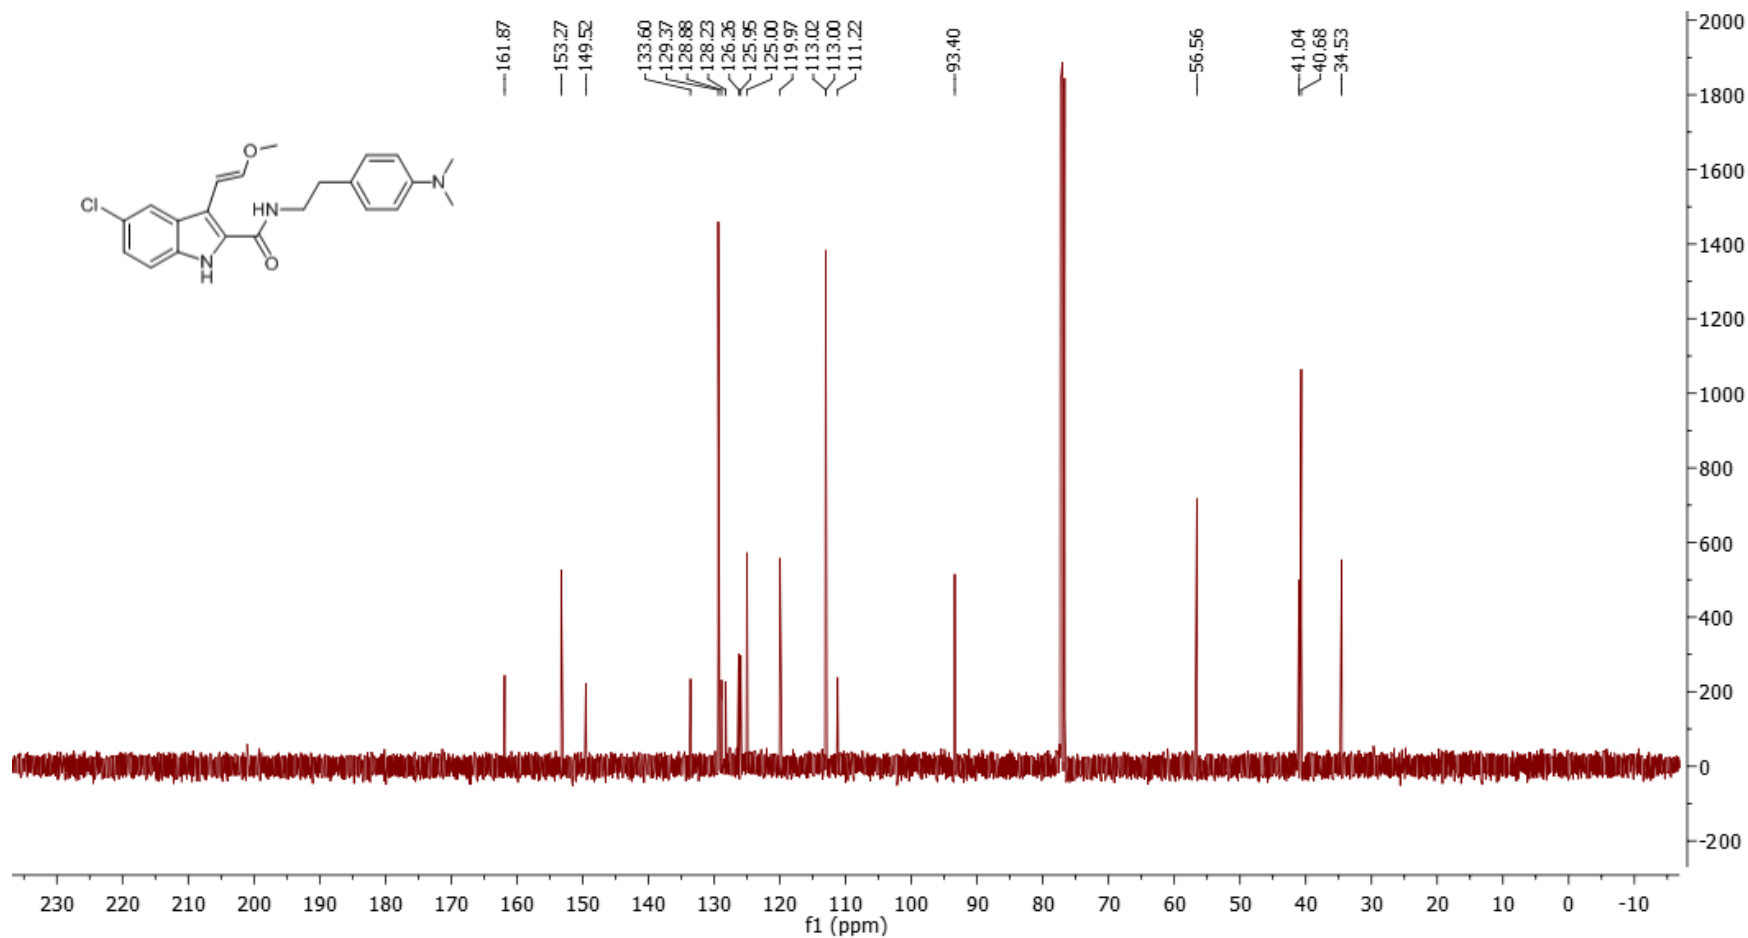

$^{13}\text{C}$  NMR (101 MHz,  $\text{cdCl}_3$ )  $\delta$  161.87, 153.27, 149.52, 133.60, 129.37, 128.88, 128.23, 126.26, 125.95, 125.00, 119.97, 113.02, 113.00, 111.22, 93.40, 56.56, 41.04, 40.68, 34.53.

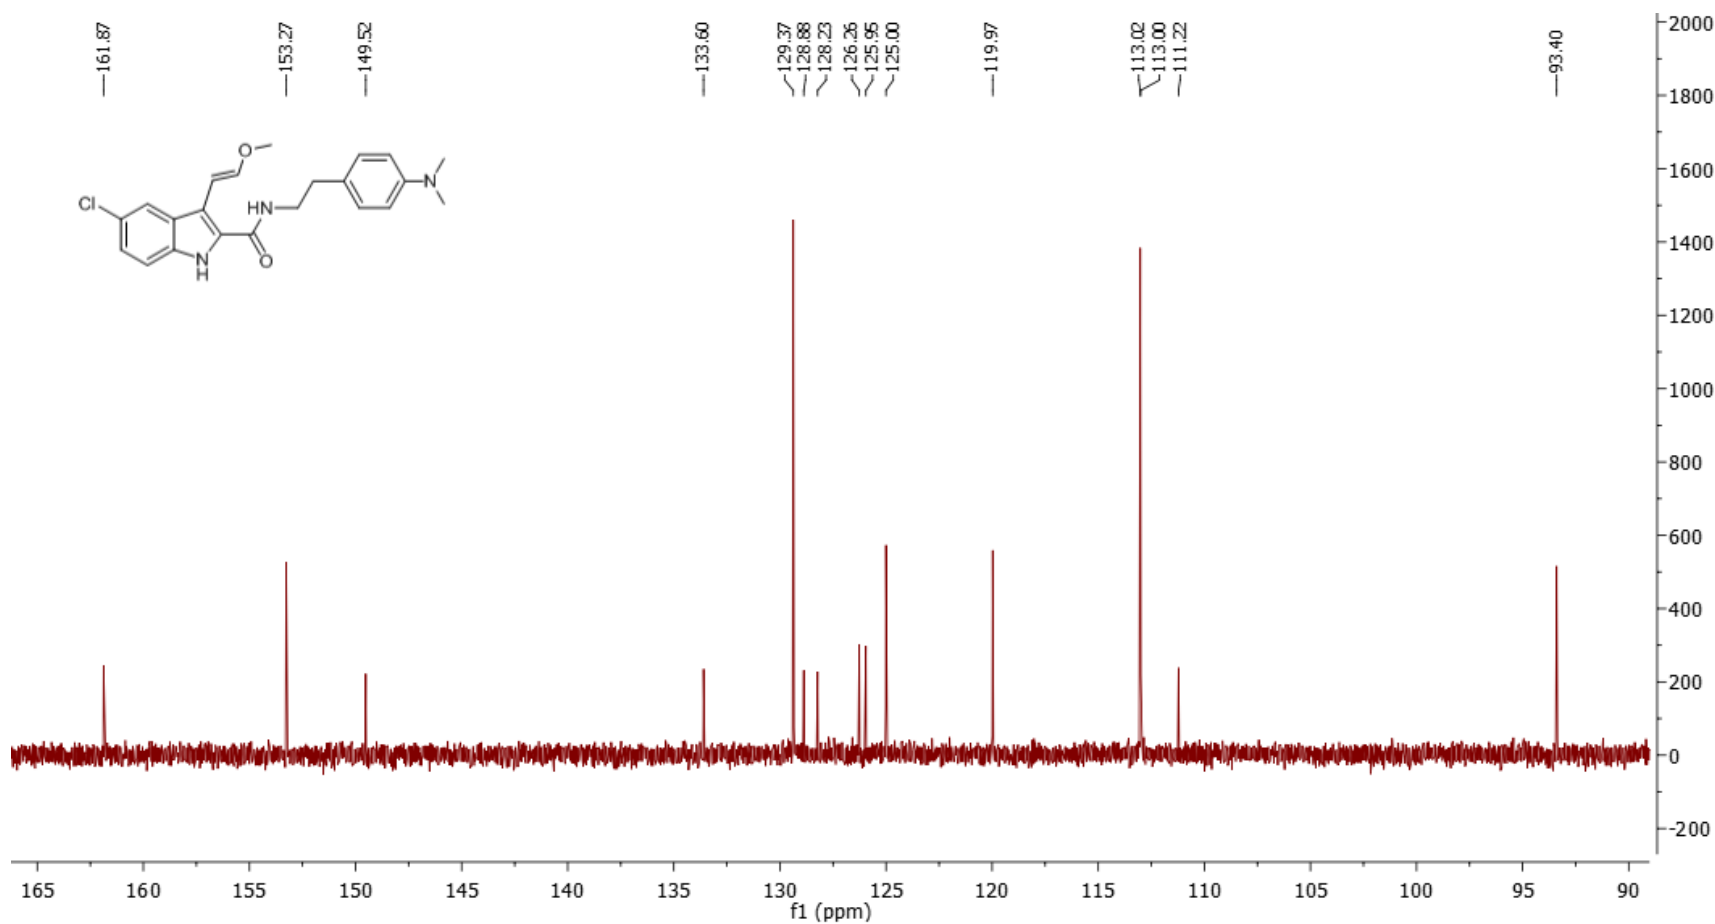

$^{13}\text{C}$  NMR (101 MHz,  $\text{cdCl}_3$ )  $\delta$  161.87, 153.27, 149.52, 133.60, 129.37, 128.88, 128.23, 126.26, 125.95, 125.00, 119.97, 113.02, 113.00, 111.22, 93.40, 56.56, 41.04, 40.68, 34.53.

# $^1\text{H}$ NMR spectrum of **5e**

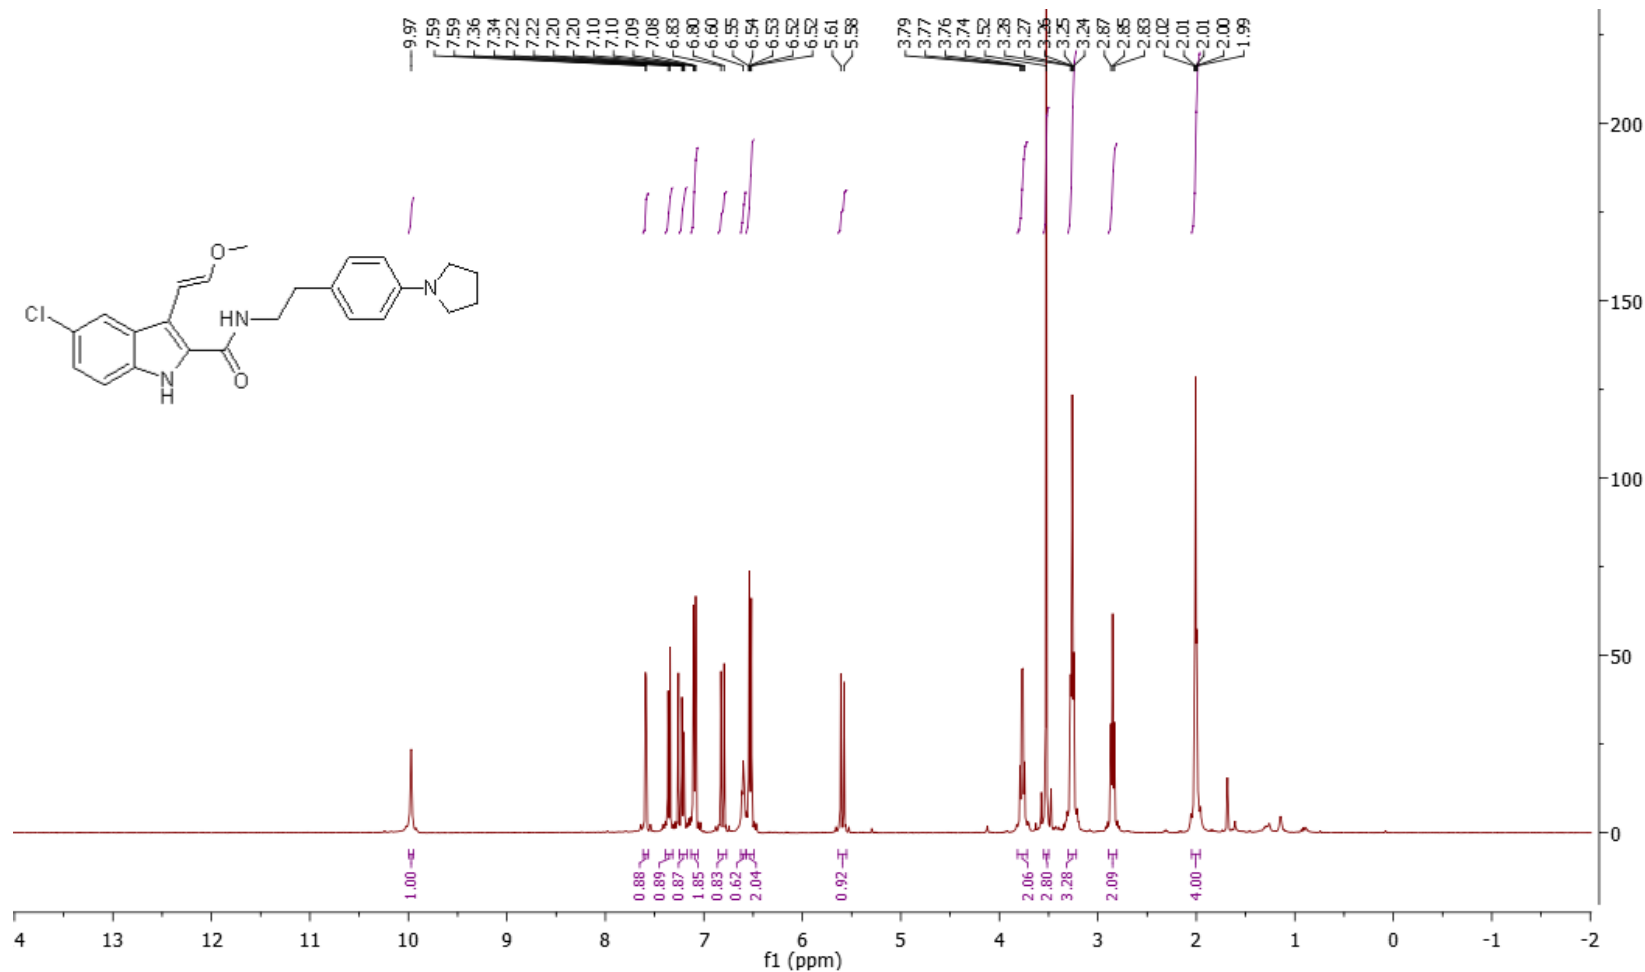

$^1\text{H}$  NMR (400 MHz, Chloroform-*d*)  $\delta$  9.97 (s, 1H), 7.59 (s, 1H), 7.35 (d,  $J = 8.7$  Hz, 1H), 7.21 (dd,  $J = 8.7, 2.0$  Hz, 1H), 7.09 (d,  $J = 8.4$  Hz, 2H), 6.81 (d,  $J = 13.0$  Hz, 1H), 6.60 (s, 1H), 6.53 (d,  $J = 8.4$  Hz, 2H), 5.59 (d,  $J = 13.0$  Hz, 1H), 3.77 (q,  $J = 6.4$  Hz, 2H), 3.52 (s, 3H), 3.30 – 3.22 (m, 4H), 2.85 (t,  $J = 6.6$  Hz, 2H), 2.05 – 1.96 (m, 4H).

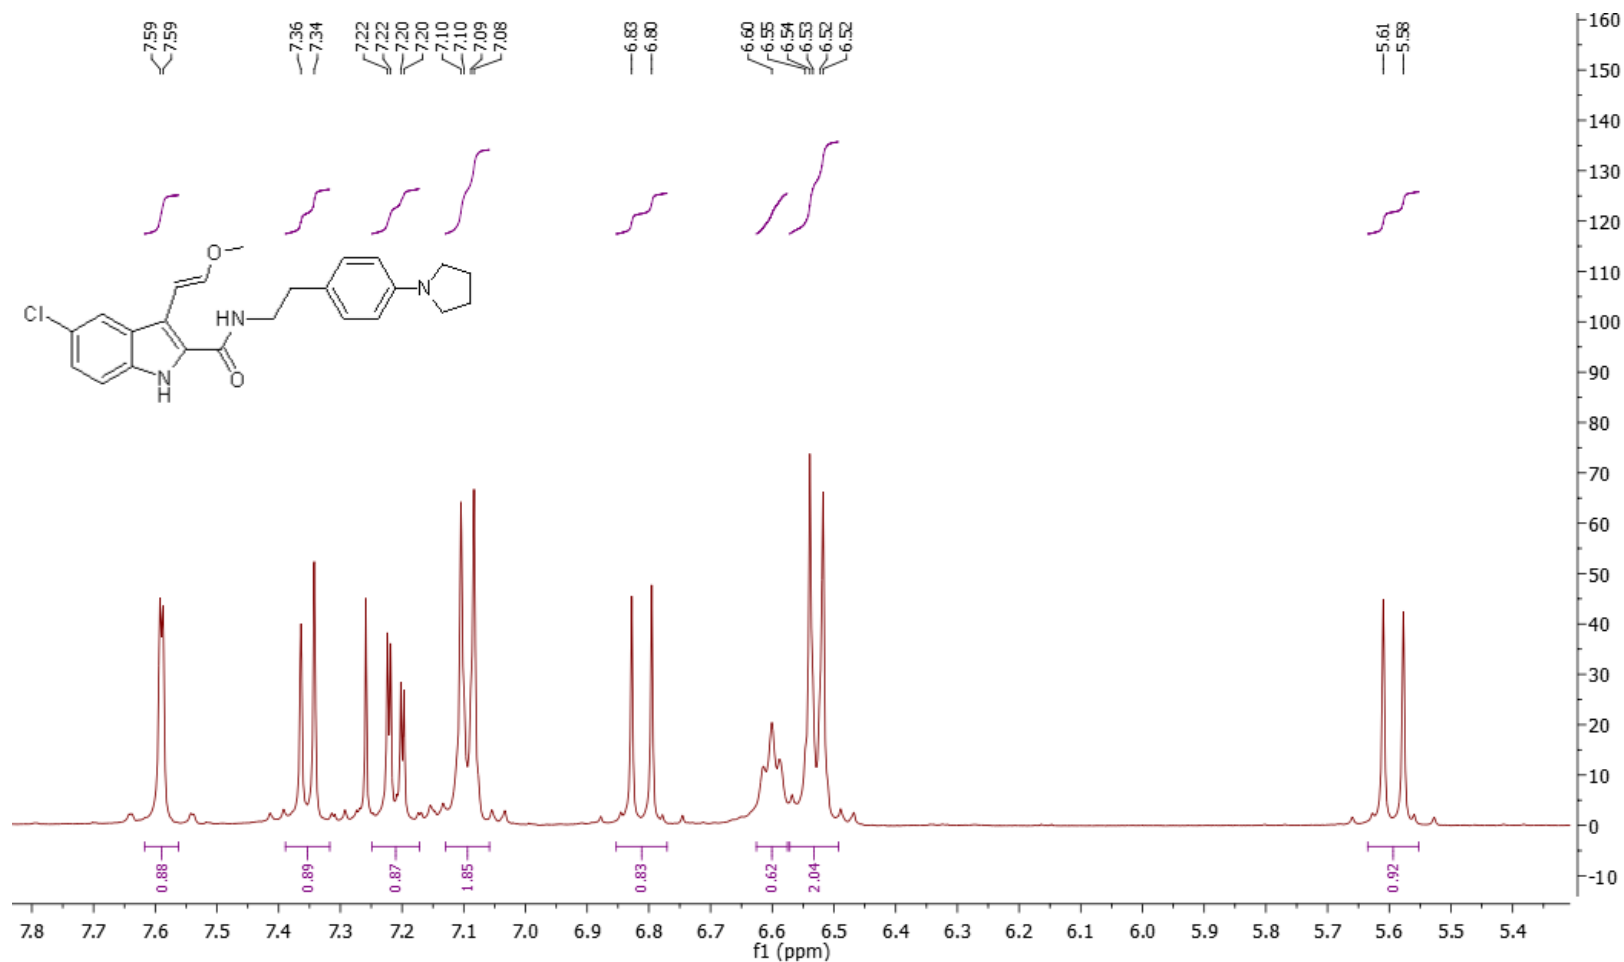

<sup>1</sup>H NMR (400 MHz, Chloroform-*d*)  $\delta$  9.97 (s, 1H), 7.59 (s, 1H), 7.35 (d, *J* = 8.7 Hz, 1H), 7.21 (dd, *J* = 8.7, 2.0 Hz, 1H), 7.09 (d, *J* = 8.4 Hz, 2H), 6.81 (d, *J* = 13.0 Hz, 1H), 6.60 (s, 1H), 6.53 (d, *J* = 8.4 Hz, 2H), 5.59 (d, *J* = 13.0 Hz, 1H), 3.77 (q, *J* = 6.4 Hz, 2H), 3.52 (s, 3H), 3.30 – 3.22 (m, 4H), 2.85 (t, *J* = 6.6 Hz, 2H), 2.05 – 1.96 (m, 4H).

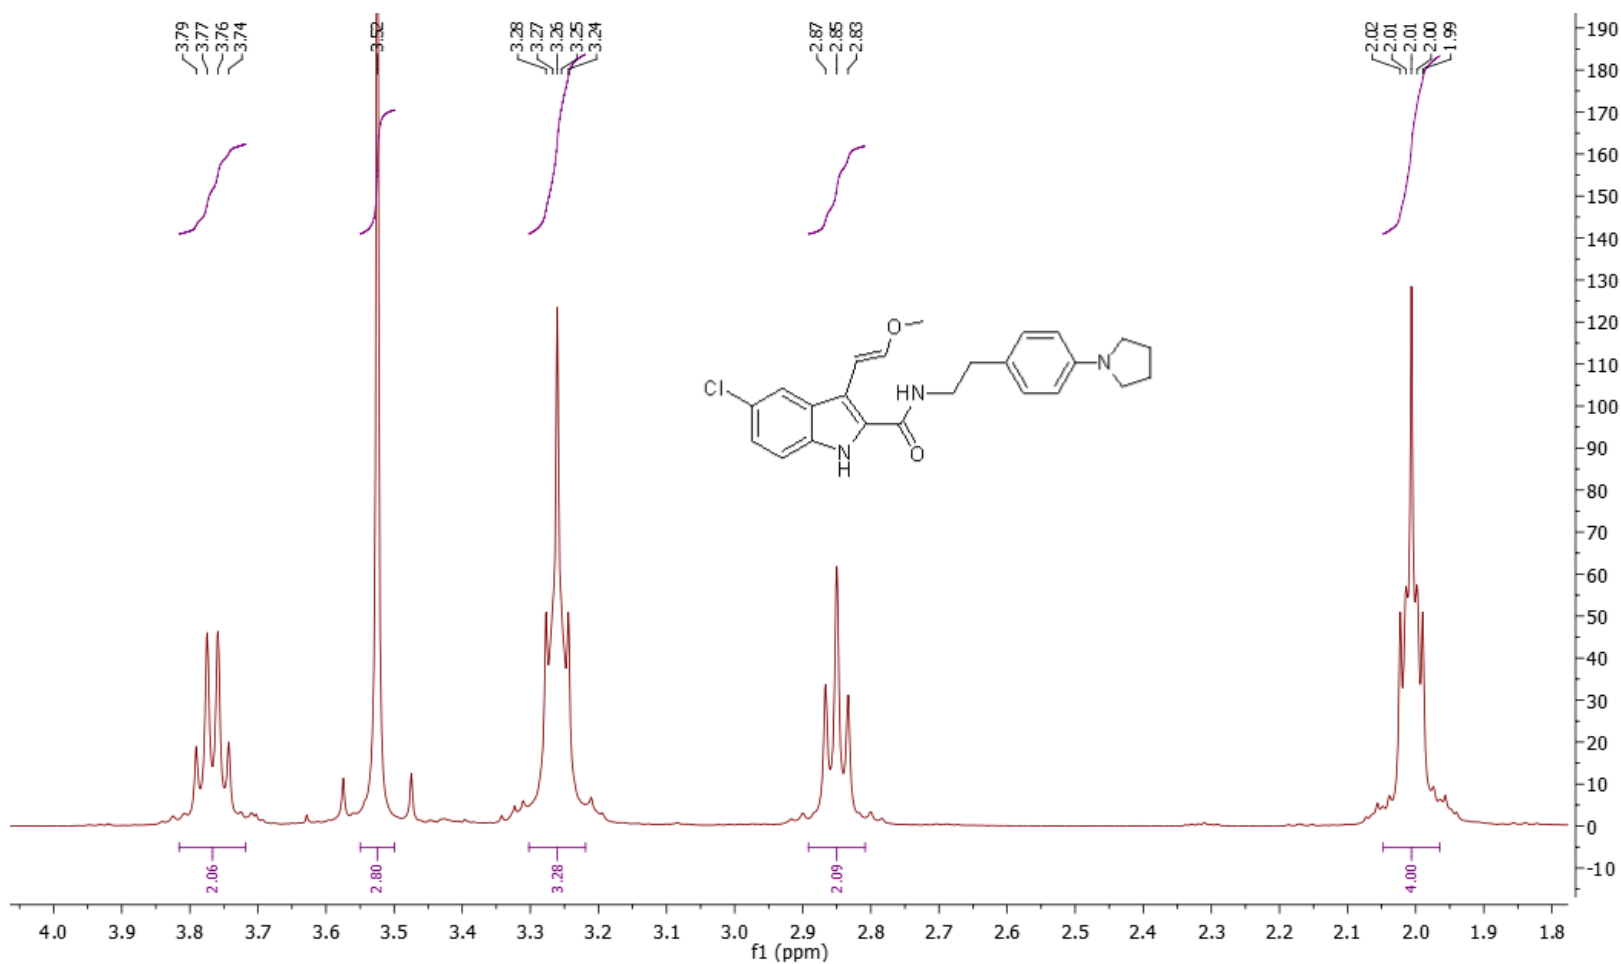

<sup>1</sup>H NMR (400 MHz, Chloroform-*d*) δ 9.97 (s, 1H), 7.59 (s, 1H), 7.35 (d, *J* = 8.7 Hz, 1H), 7.21 (dd, *J* = 8.7, 2.0 Hz, 1H), 7.09 (d, *J* = 8.4 Hz, 2H), 6.81 (d, *J* = 13.0 Hz, 1H), 6.60 (s, 1H), 6.53 (d, *J* = 8.4 Hz, 2H), 5.59 (d, *J* = 13.0 Hz, 1H), 3.77 (q, *J* = 6.4 Hz, 2H), 3.52 (s, 3H), 3.30 – 3.22 (m, 4H), 2.85 (t, *J* = 6.6 Hz, 2H), 2.05 – 1.96 (m, 4H).



# $^{13}\text{C}$ NMR spectrum of **5e**

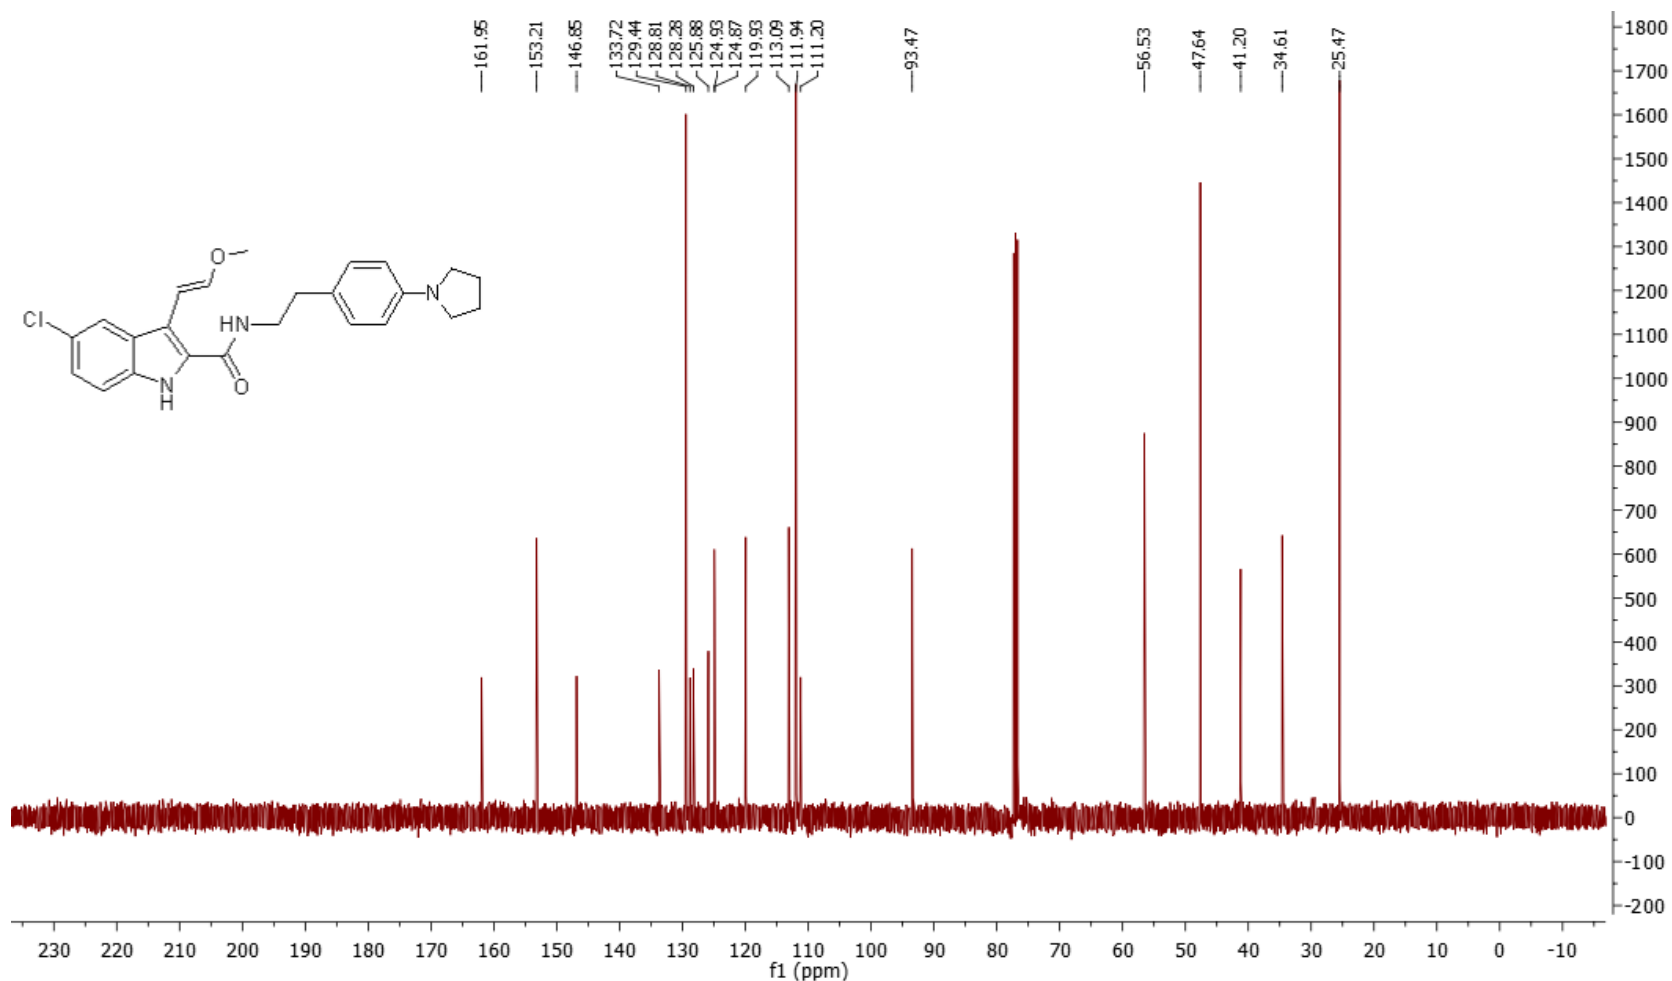

$^{13}\text{C}$  NMR (101 MHz,  $\text{CDCl}_3$ )  $\delta$  161.95, 153.21, 146.85, 133.72, 129.44, 128.81, 128.28, 125.88, 124.93, 124.87, 119.93, 113.09, 111.94, 111.20, 93.47, 56.53, 47.64, 41.20, 34.61, 25.47.

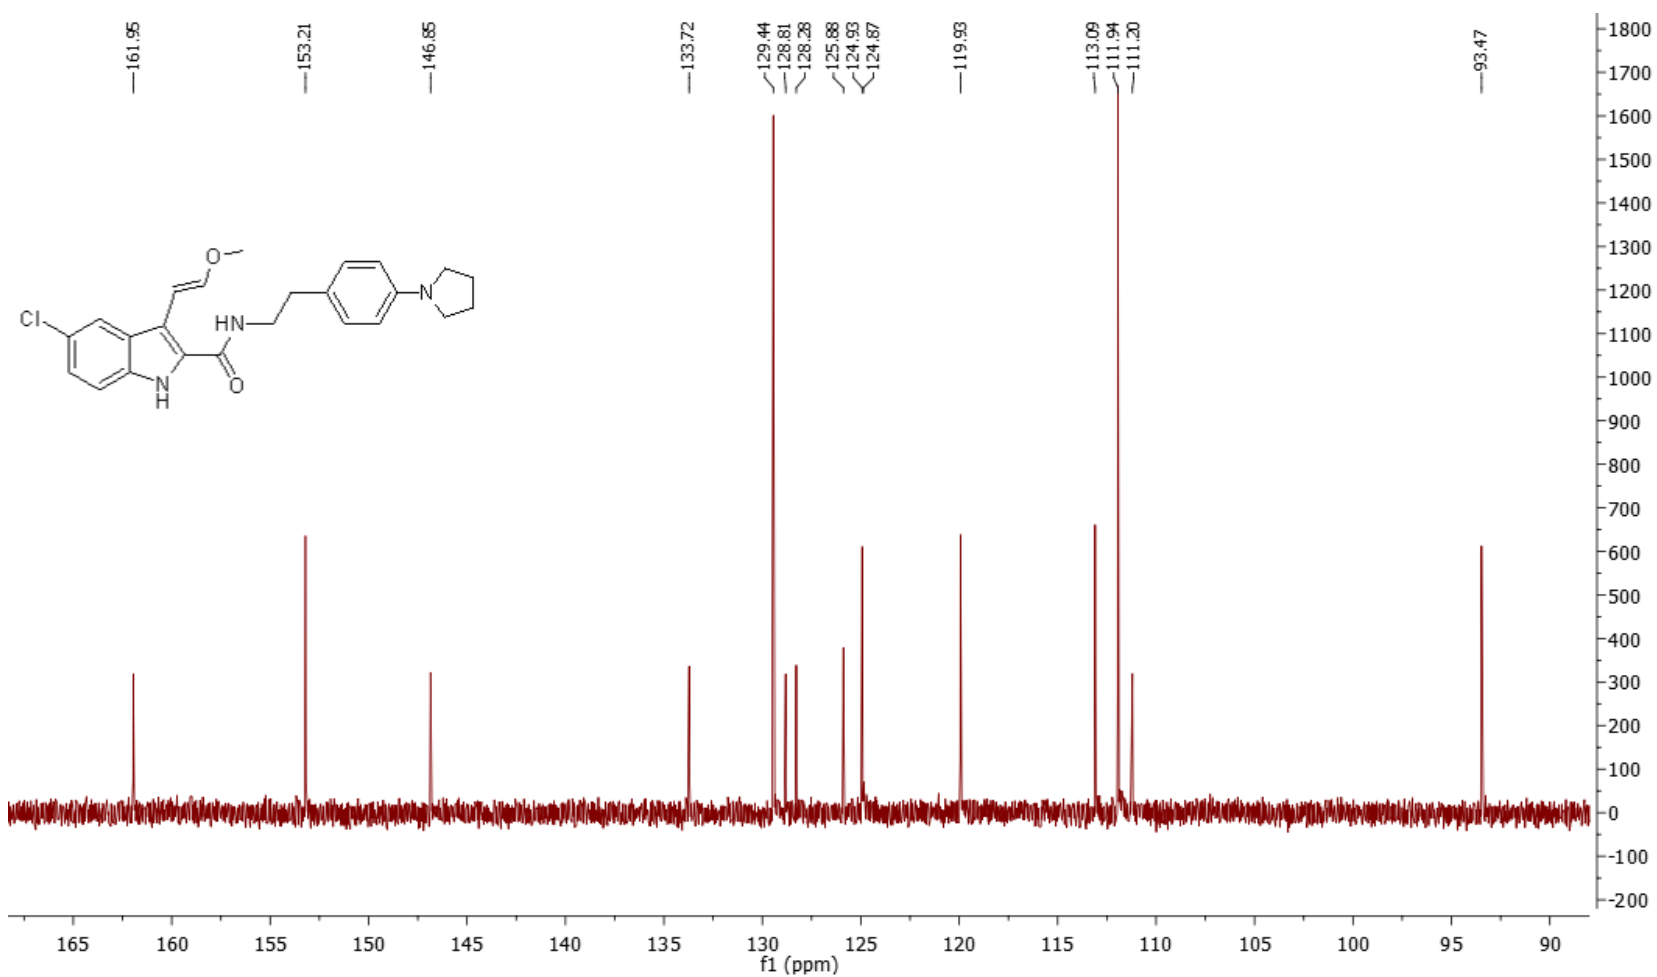

<sup>13</sup>C NMR (101 MHz, cdcl<sub>3</sub>) δ 161.95, 153.21, 146.85, 133.72, 129.44, 128.81, 128.28, 125.88, 124.93, 124.87, 119.93, 113.09, 111.94, 111.20, 93.47, 56.53, 47.64, 41.20, 34.61, 25.47.

# $^1\text{H}$ NMR spectrum of **5f**

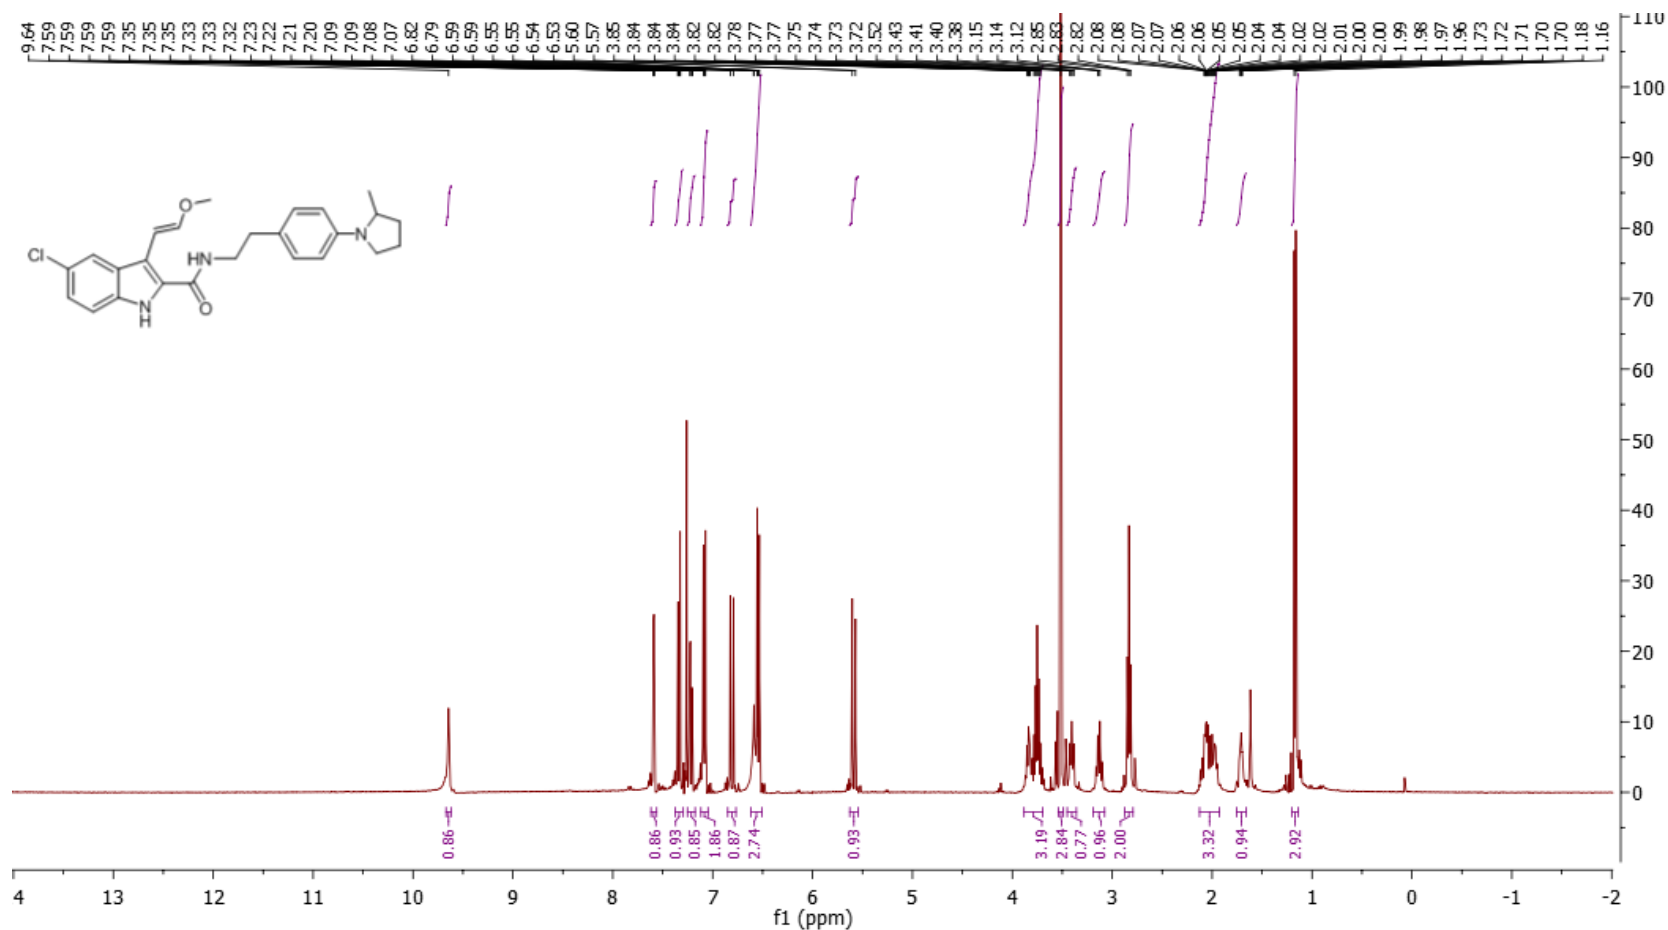

$^1\text{H}$  NMR (400 MHz, Chloroform- $d$ )  $\delta$  9.64 (s, 1H), 7.59 (s, 1H), 7.34 (d,  $J$  = 8.8 Hz, 1H), 7.21 (dd,  $J$  = 8.7, 2.0 Hz, 1H), 7.08 (d,  $J$  = 8.4 Hz, 2H), 6.81 (d,  $J$  = 13.0 Hz, 1H), 6.62 – 6.51 (m, 3H), 5.59 (d,  $J$  = 13.0 Hz, 1H), 3.88 – 3.70 (m, 3H), 3.52 (s, 3H), 3.41 (dd,  $J$  = 9.4, 7.3 Hz, 1H), 3.13 (m, 1H), 2.83 (t,  $J$  = 6.6 Hz, 2H), 2.13 – 1.93 (m, 3H), 1.71 (m, 1H), 1.17 (d,  $J$  = 6.2 Hz, 3H).

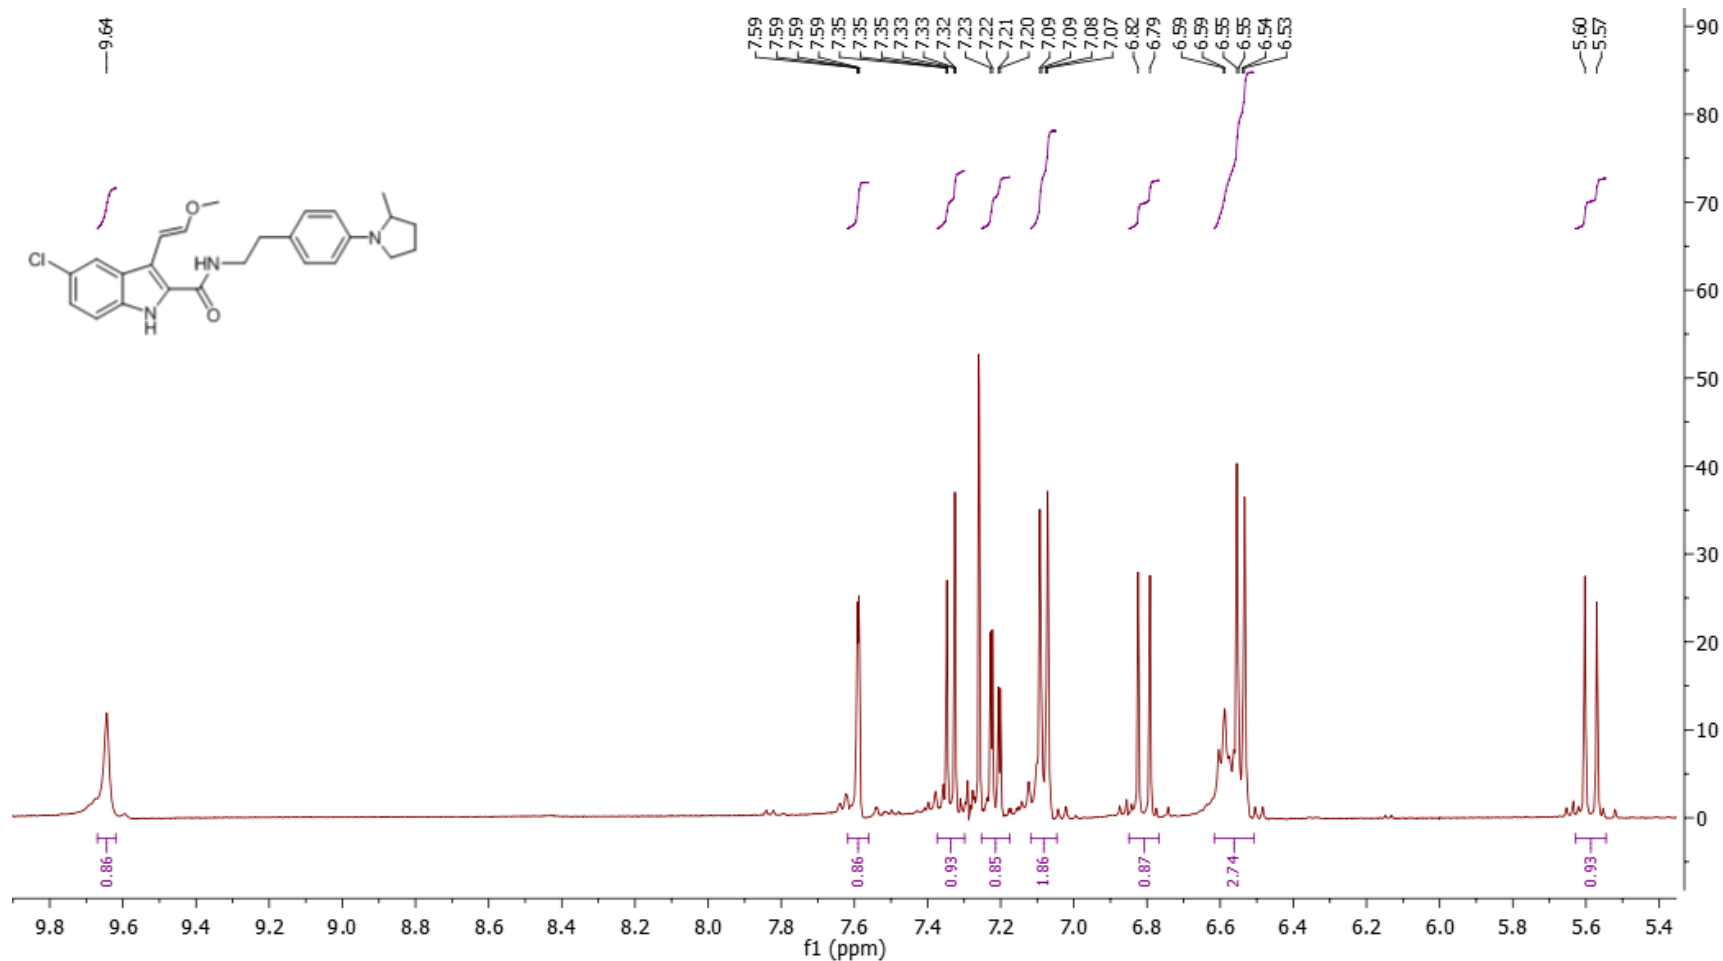

<sup>1</sup>H NMR (400 MHz, Chloroform-*d*) δ 9.64 (s, 1H), 7.59 (s 1H), 7.34 (d, *J* = 8.8 Hz, 1H), 7.21 (dd, *J* = 8.7, 2.0 Hz, 1H), 7.08 (d, *J* = 8.4 Hz, 2H), 6.81 (d, *J* = 13.0 Hz, 1H), 6.62 – 6.51 (m, 3H), 5.59 (d, *J* = 13.0 Hz, 1H), 3.88 – 3.70 (m, 3H), 3.52 (s, 3H), 3.41 (dd, *J* = 9.4, 7.3 Hz, 1H), 3.13 (m, 1H), 2.83 (t, *J* = 6.6 Hz, 2H), 2.13 – 1.93 (m, 3H), 1.71 (m, 1H), 1.17 (d, *J* = 6.2 Hz, 3H).

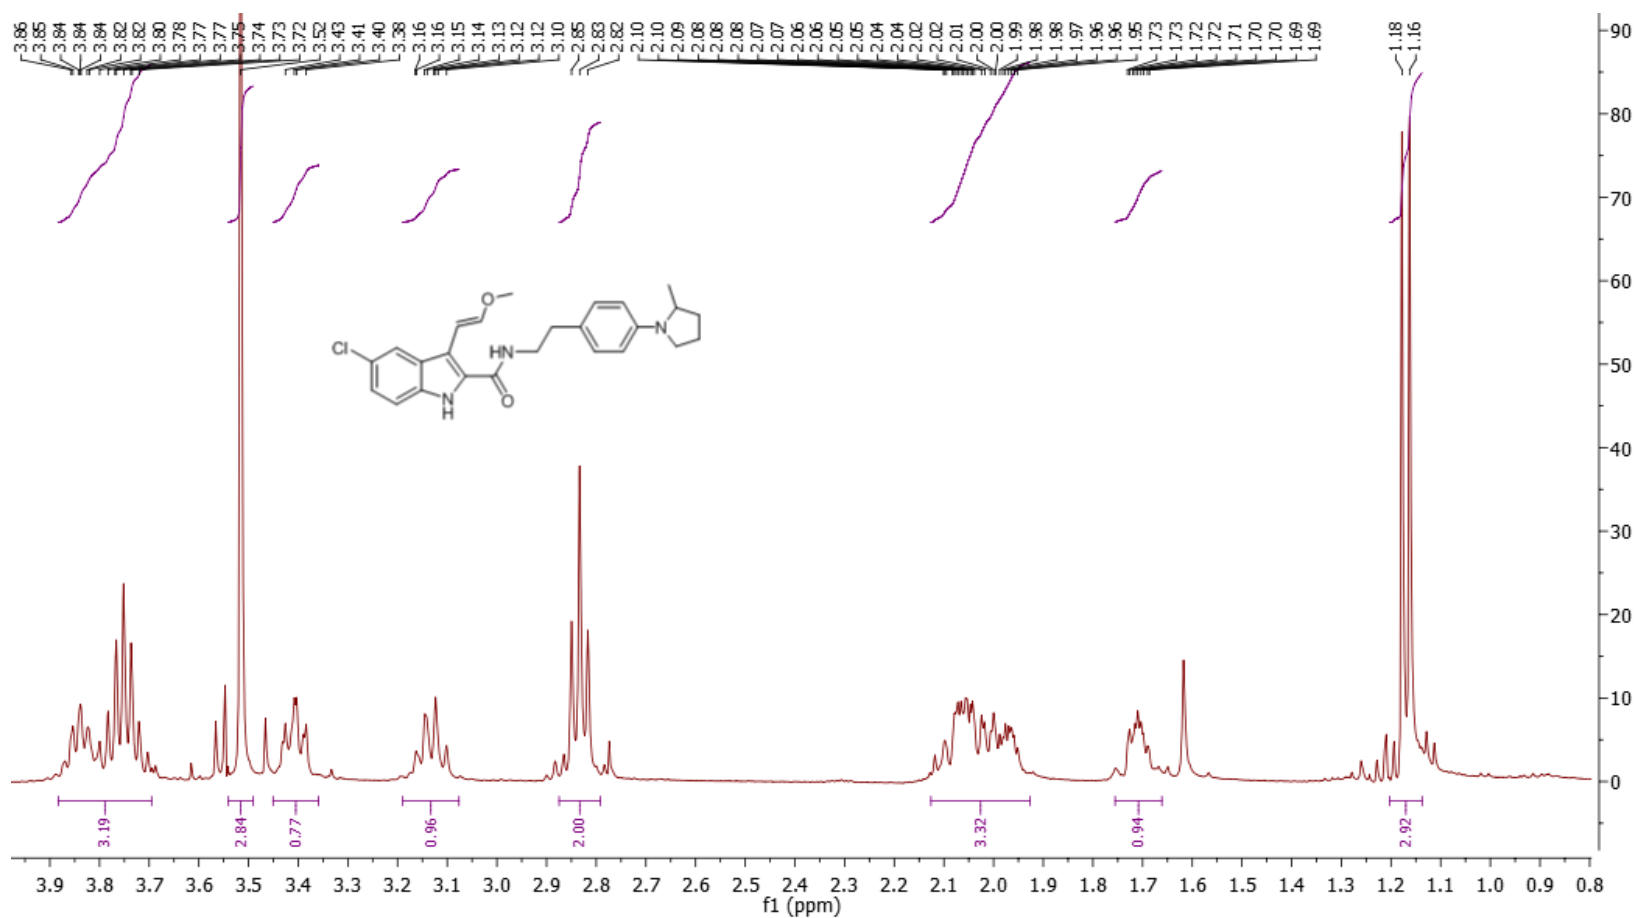

$^1\text{H}$  NMR (400 MHz, Chloroform-*d*)  $\delta$  9.64 (s, 1H), 7.59 (s 1H), 7.34 (d,  $J$  = 8.8 Hz, 1H), 7.21 (dd,  $J$  = 8.7, 2.0 Hz, 1H), 7.08 (d,  $J$  = 8.4 Hz, 2H), 6.81 (d,  $J$  = 13.0 Hz, 1H), 6.62 – 6.51 (m, 3H), 5.59 (d,  $J$  = 13.0 Hz, 1H), 3.88 – 3.70 (m, 3H), 3.52 (s, 3H), 3.41 (dd,  $J$  = 9.4, 7.3 Hz, 1H), 3.13 (m, 1H), 2.83 (t,  $J$  = 6.6 Hz, 2H), 2.13 – 1.93 (m, 3H), 1.71 (m, 1H), 1.17 (d,  $J$  = 6.2 Hz, 3H).

# $^{13}\text{C}$ NMR spectrum of 5f

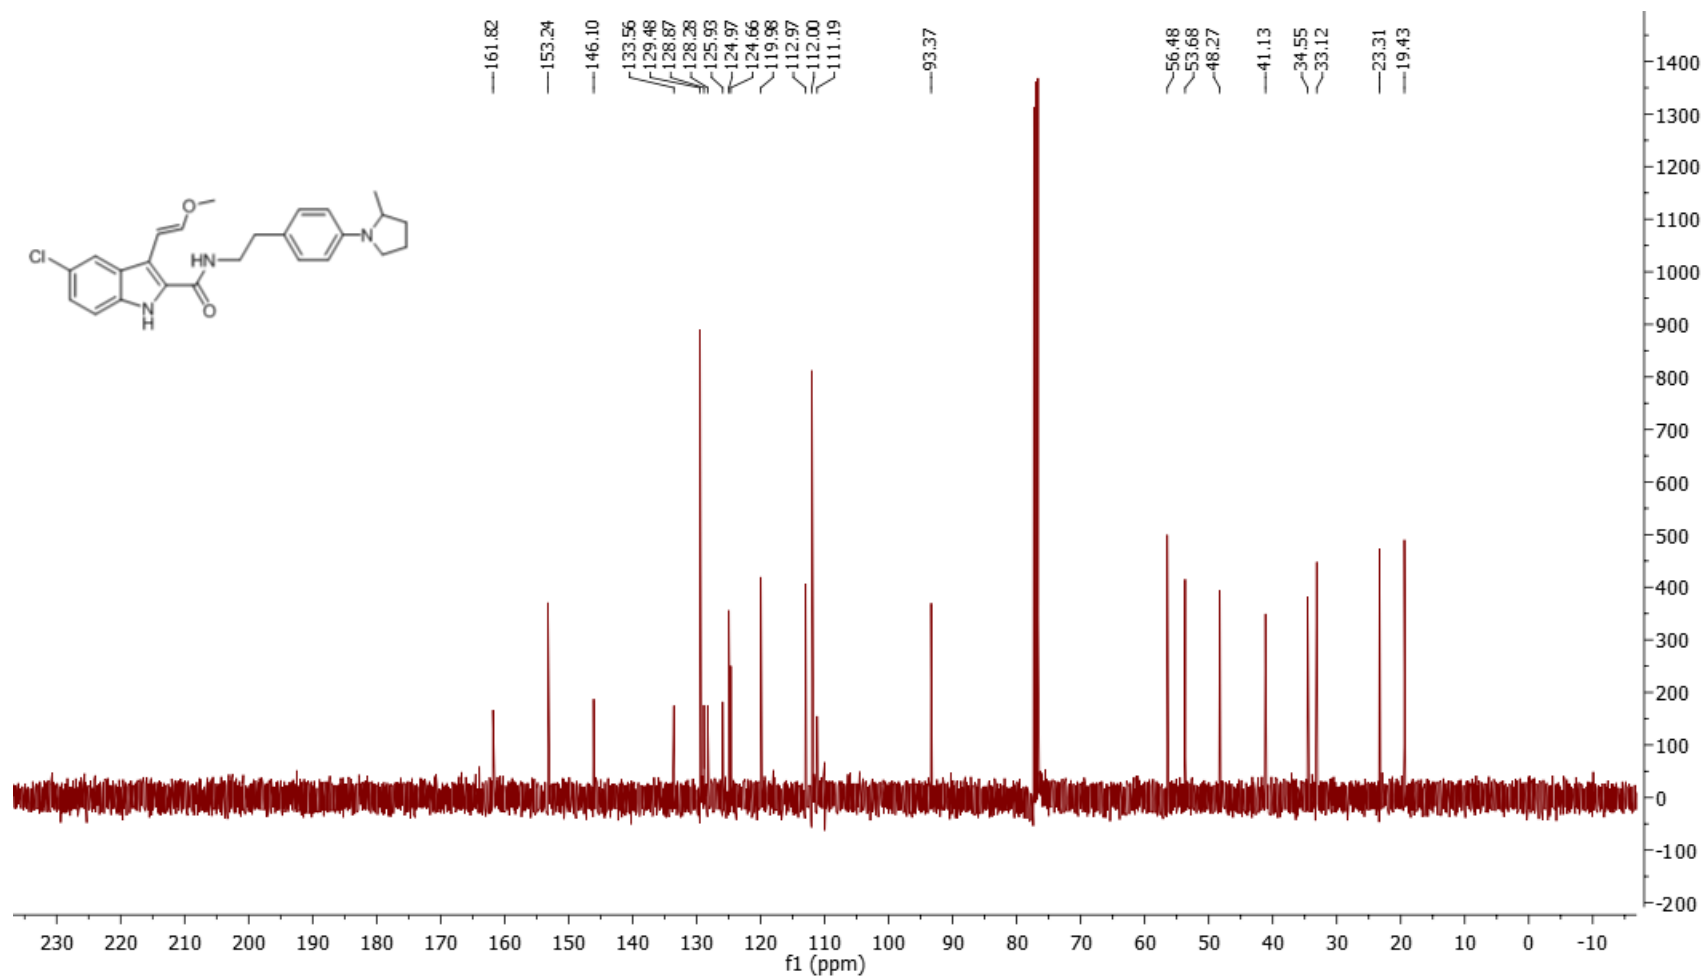

$^{13}\text{C}$  NMR (101 MHz,  $\text{CDCl}_3$ )  $\delta$  161.82, 153.24, 146.10, 133.56, 129.48, 128.87, 128.28, 125.93, 124.97, 124.66, 119.98, 112.97, 112.00, 111.19, 93.37, 56.48, 53.68, 48.27, 41.13, 34.55, 33.12, 23.31, 19.43.

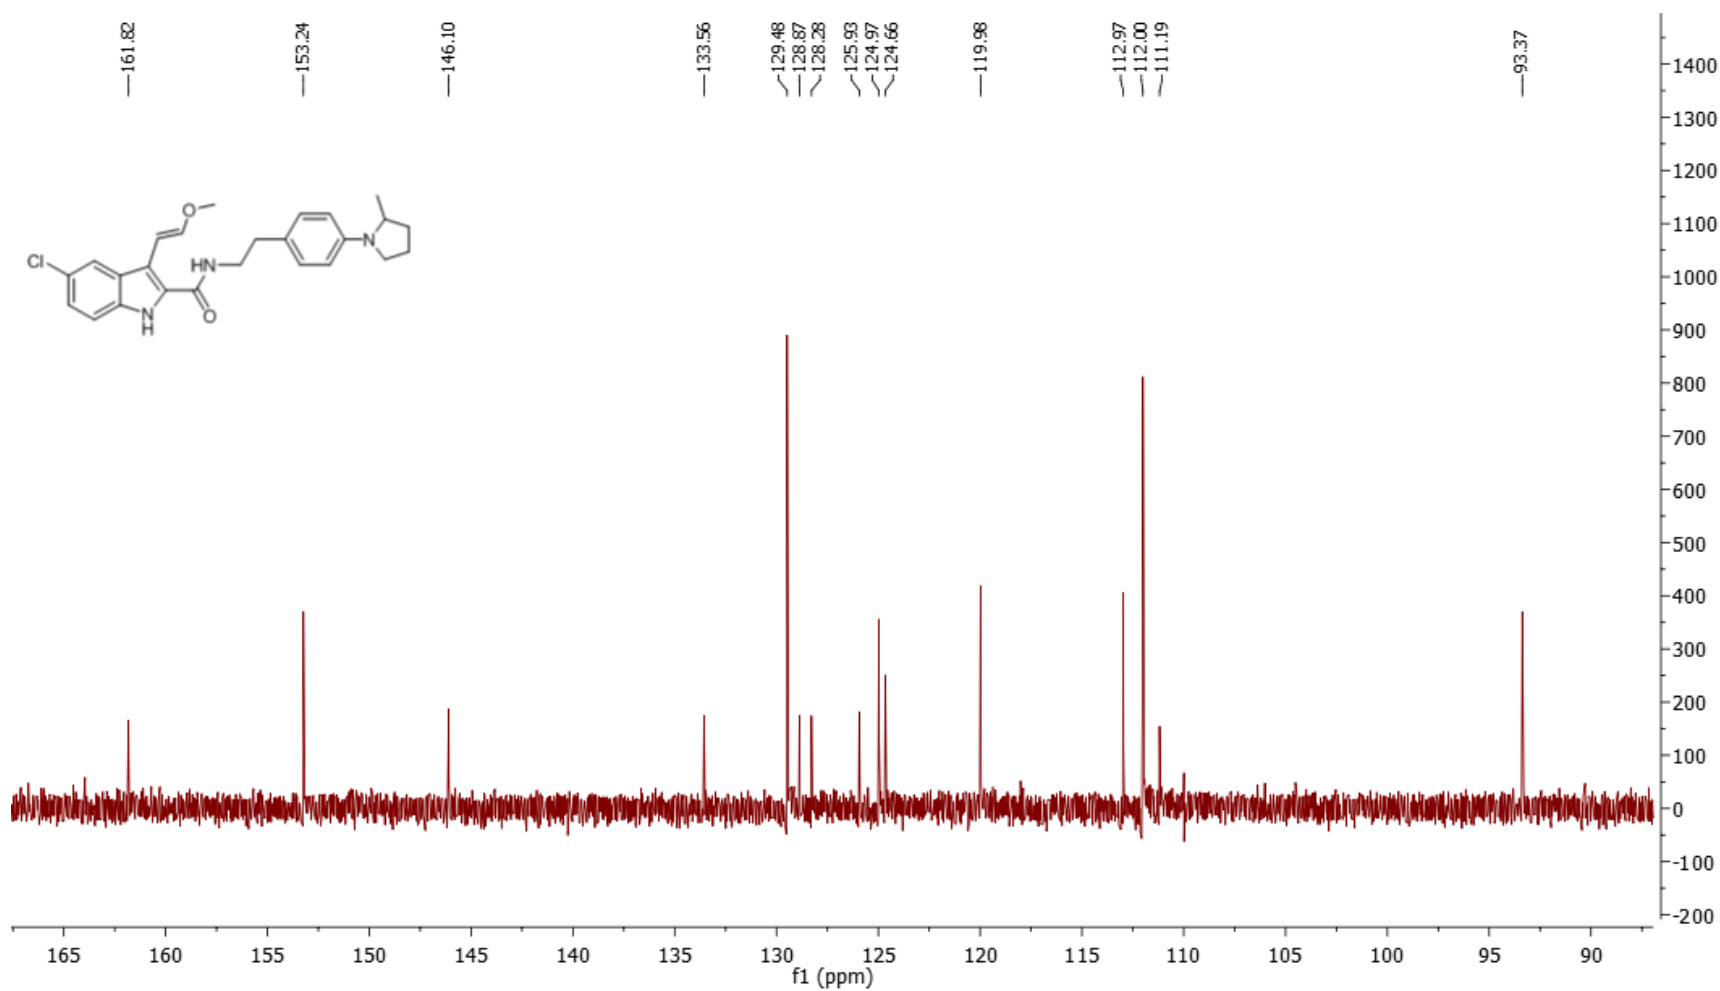

$^{13}\text{C}$  NMR (101 MHz,  $\text{cdCl}_3$ )  $\delta$  161.82, 153.24, 146.10, 133.56, 129.48, 128.87, 128.28, 125.93, 124.97, 124.66, 119.98, 112.97, 112.00, 111.19, 93.37, 56.48, 53.68, 48.27, 41.13, 34.55, 33.12, 23.31, 19.43.

# $^1\text{H}$ NMR spectrum of 5g

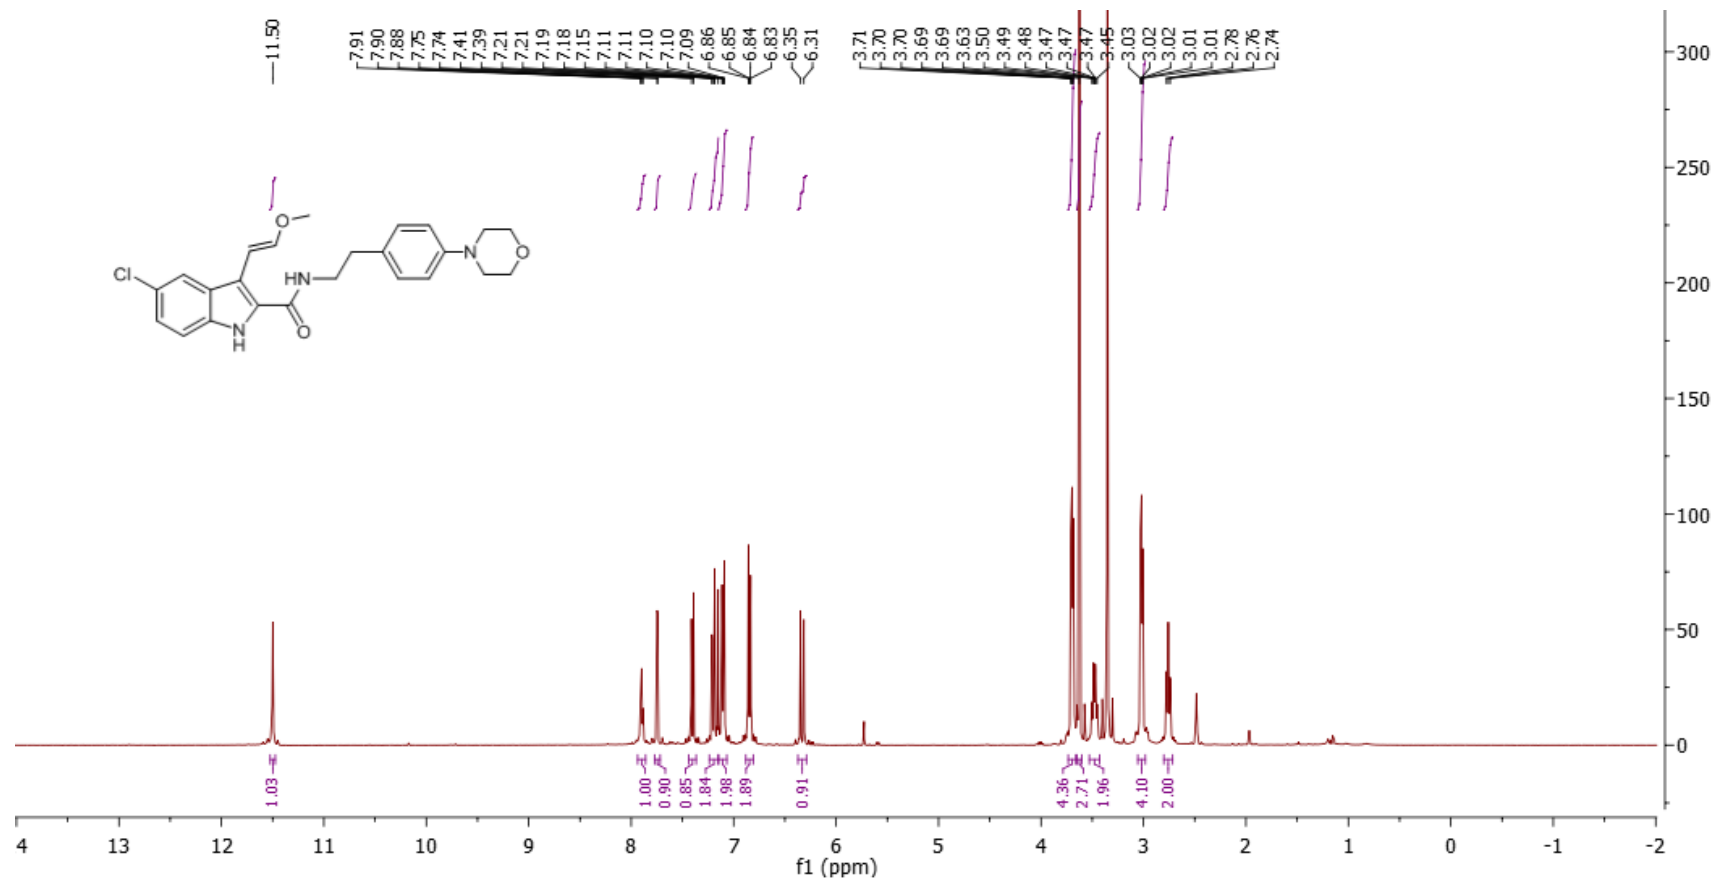

$^1\text{H}$  NMR (400 MHz,  $\text{DMSO}-d_6$ )  $\delta$  11.50 (s, 1H), 7.90 (t,  $J = 5.6$  Hz, 1H), 7.74 (s, 1H), 7.40 (d,  $J = 8.7$  Hz, 1H), 7.24 – 7.15 (m, 2H), 7.10 (d,  $J = 8.6$  Hz, 2H), 6.85 (d,  $J = 8.6$  Hz, 2H), 6.33 (d,  $J = 13.2$  Hz, 1H), 3.73 – 3.66 (m, 4H), 3.63 (s, 3H), 3.48 (q,  $J = 7.8$  Hz, 2H), 3.06 – 2.98 (m, 4H), 2.76 (t,  $J = 7.3$  Hz, 2H).



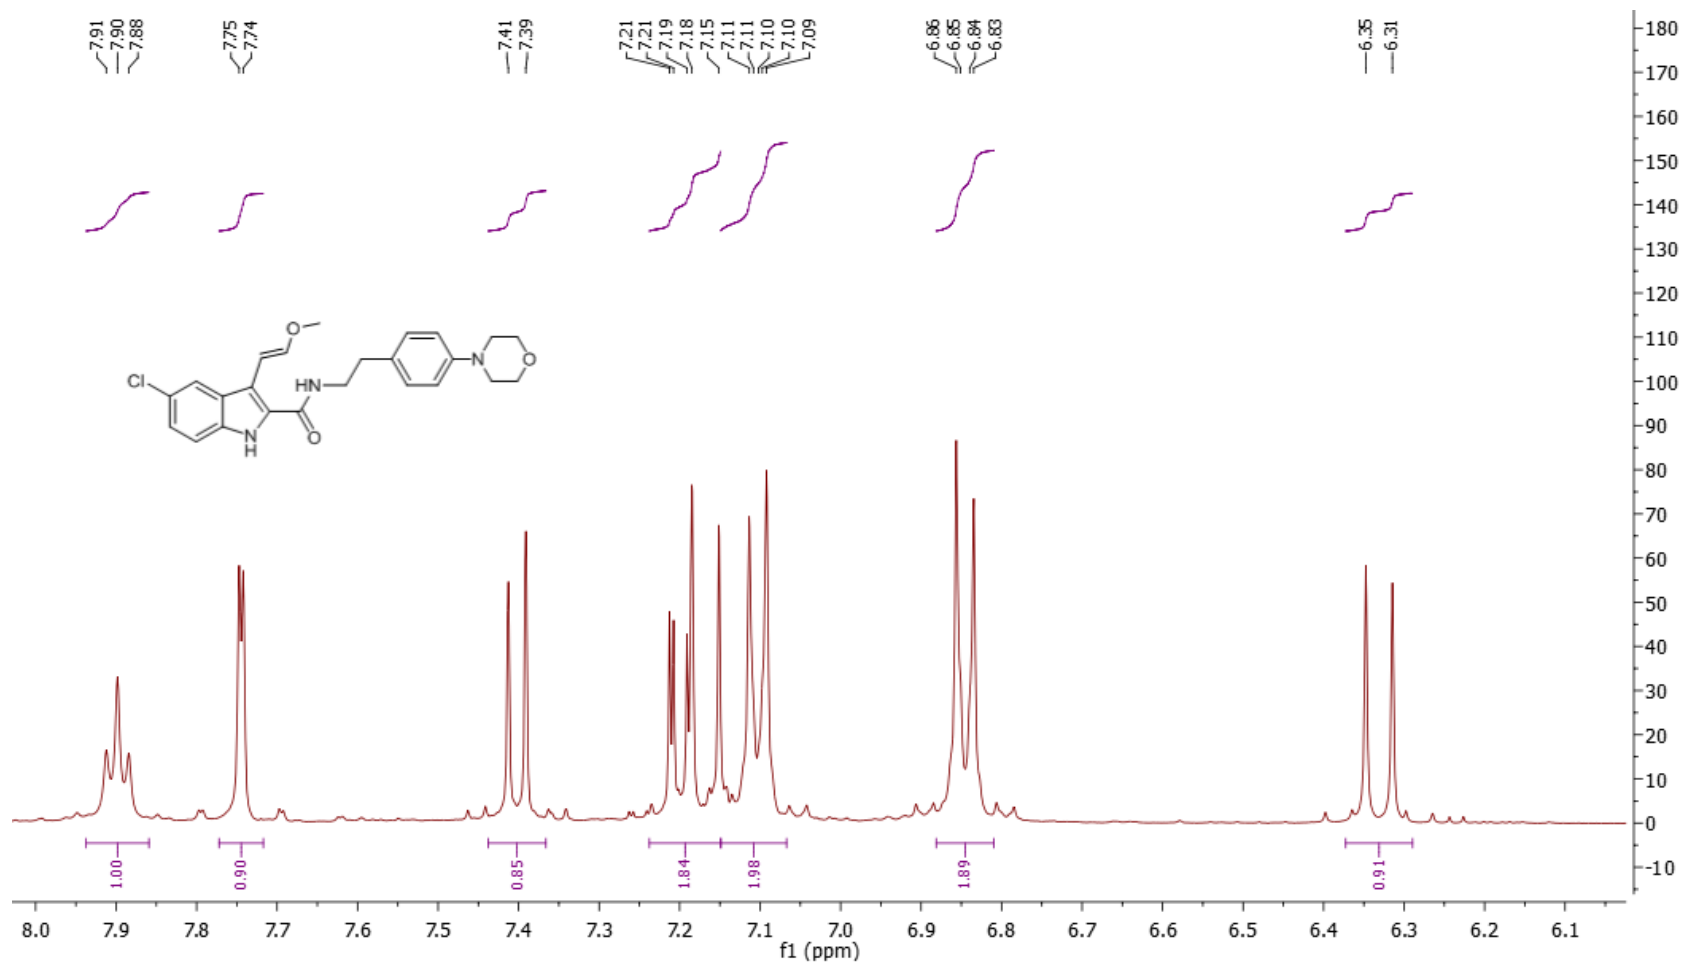

<sup>1</sup>H NMR (400 MHz, DMSO-*d*<sub>6</sub>) δ 11.50 (s, 1H), 7.90 (t, *J* = 5.6 Hz, 1H), 7.74 (s, 1H), 7.40 (d, *J* = 8.7 Hz, 1H), 7.24 – 7.15 (m, 2H), 7.10 (d, *J* = 8.6 Hz, 2H), 6.85 (d, *J* = 8.6 Hz, 2H), 6.33 (d, *J* = 13.2 Hz, 1H), 3.73 – 3.66 (m, 4H), 3.63 (s, 3H), 3.48 (q, *J* = 7.8 Hz, 2H), 3.06 – 2.98 (m, 4H), 2.76 (t, *J* = 7.3 Hz, 2H).

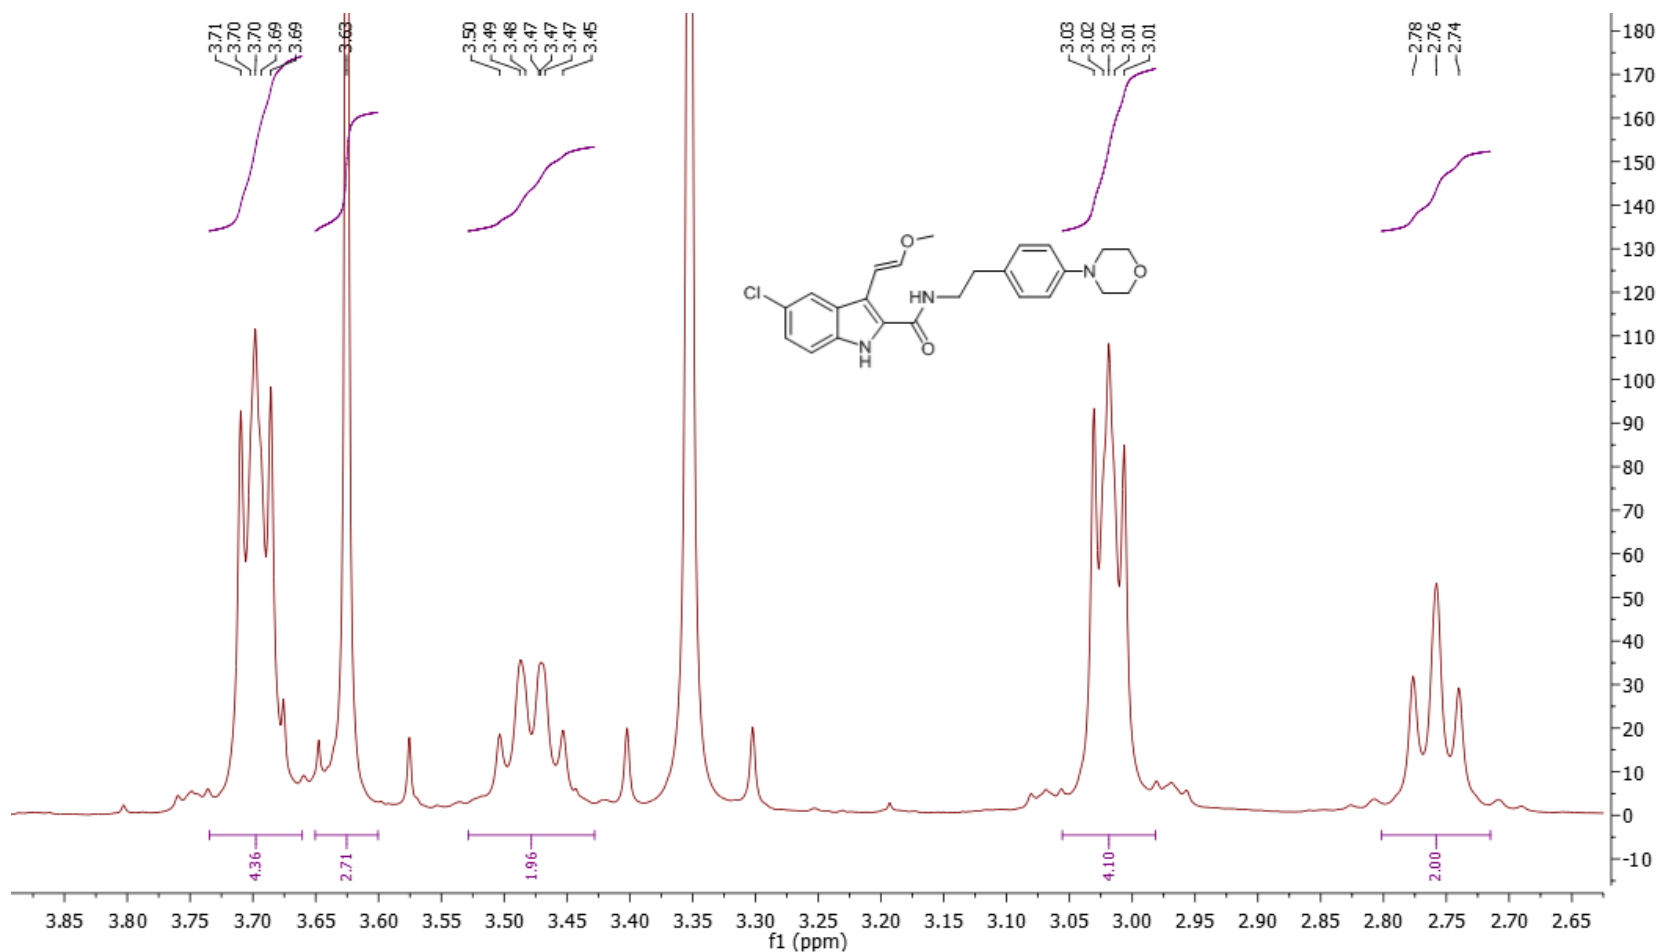

$^1\text{H}$  NMR (400 MHz,  $\text{DMSO-}d_6$ )  $\delta$  11.50 (s, 1H), 7.90 (t,  $J = 5.6$  Hz, 1H), 7.74 (s, 1H), 7.40 (d,  $J = 8.7$  Hz, 1H), 7.24 – 7.15 (m, 2H), 7.10 (d,  $J = 8.6$  Hz, 2H), 6.85 (d,  $J = 8.6$  Hz, 2H), 6.33 (d,  $J = 13.2$  Hz, 1H), 3.73 – 3.66 (m, 4H), 3.63 (s, 3H), 3.48 (q,  $J = 7.8$  Hz, 2H), 3.06 – 2.98 (m, 4H), 2.76 (t,  $J = 7.3$  Hz, 2H).

# $^{13}\text{C}$ NMR spectrum of 5g

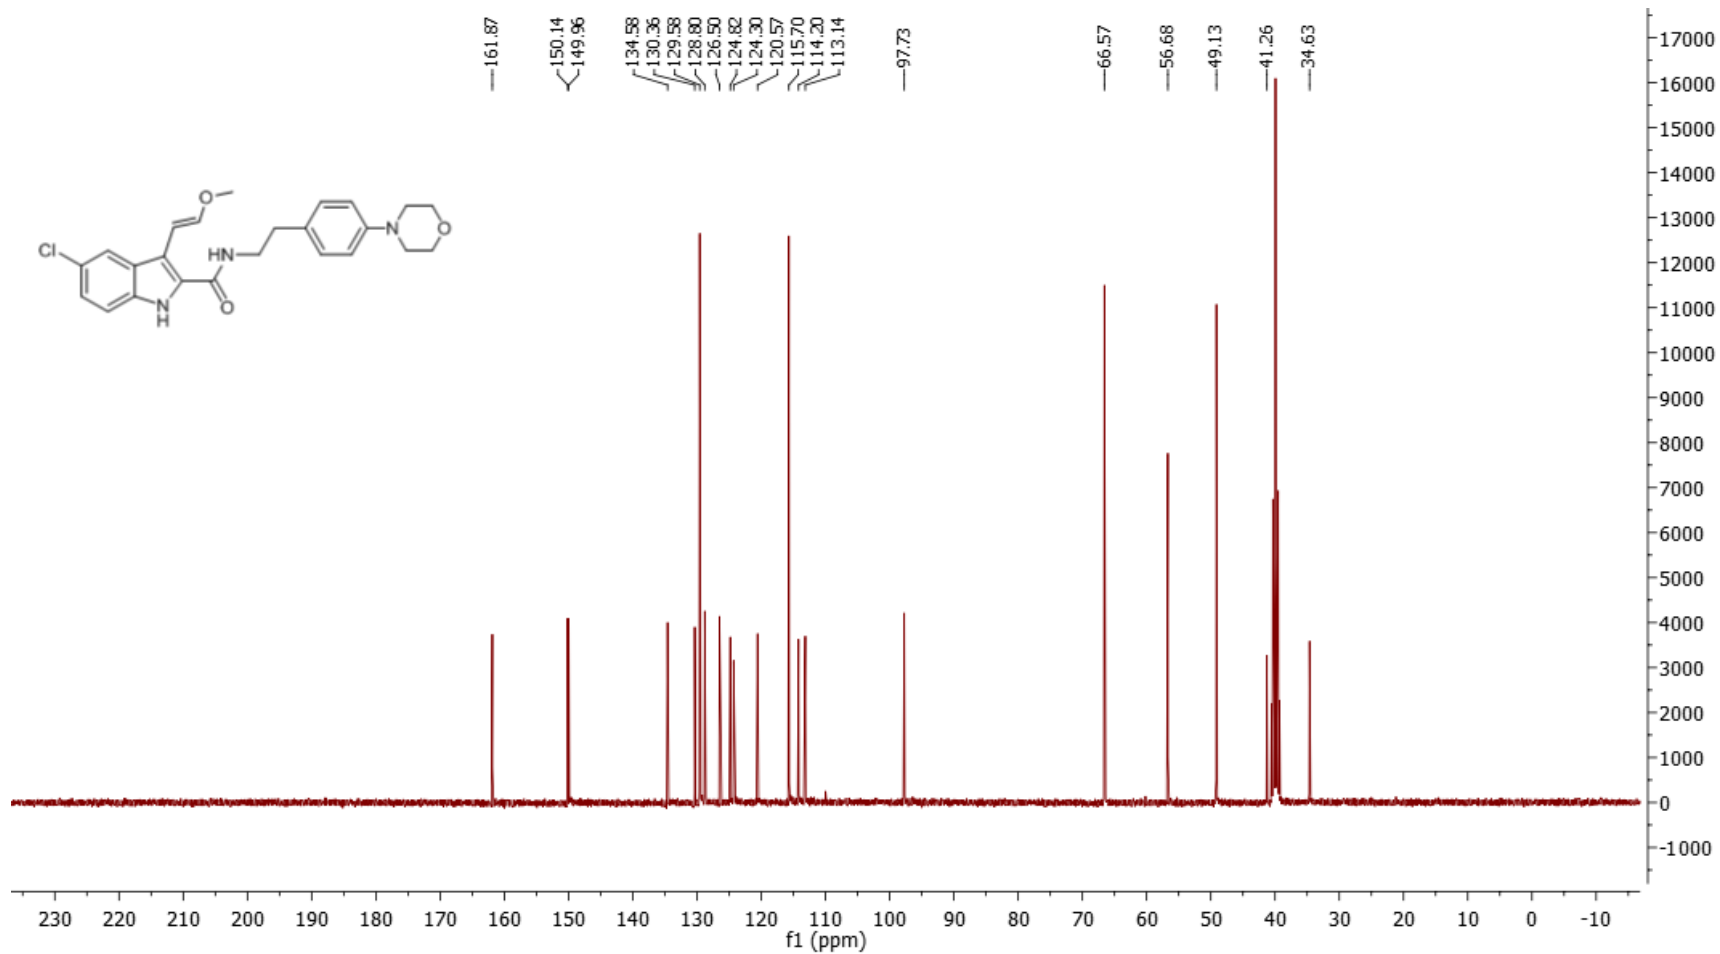

$^{13}\text{C}$  NMR (101 MHz, dmso)  $\delta$  161.87, 150.14, 149.96, 134.58, 130.36, 129.58, 128.80, 126.50, 124.82, 124.30, 120.57, 115.70, 114.20, 113.14, 97.73, 66.57, 56.68, 49.13, 41.26, 34.63.

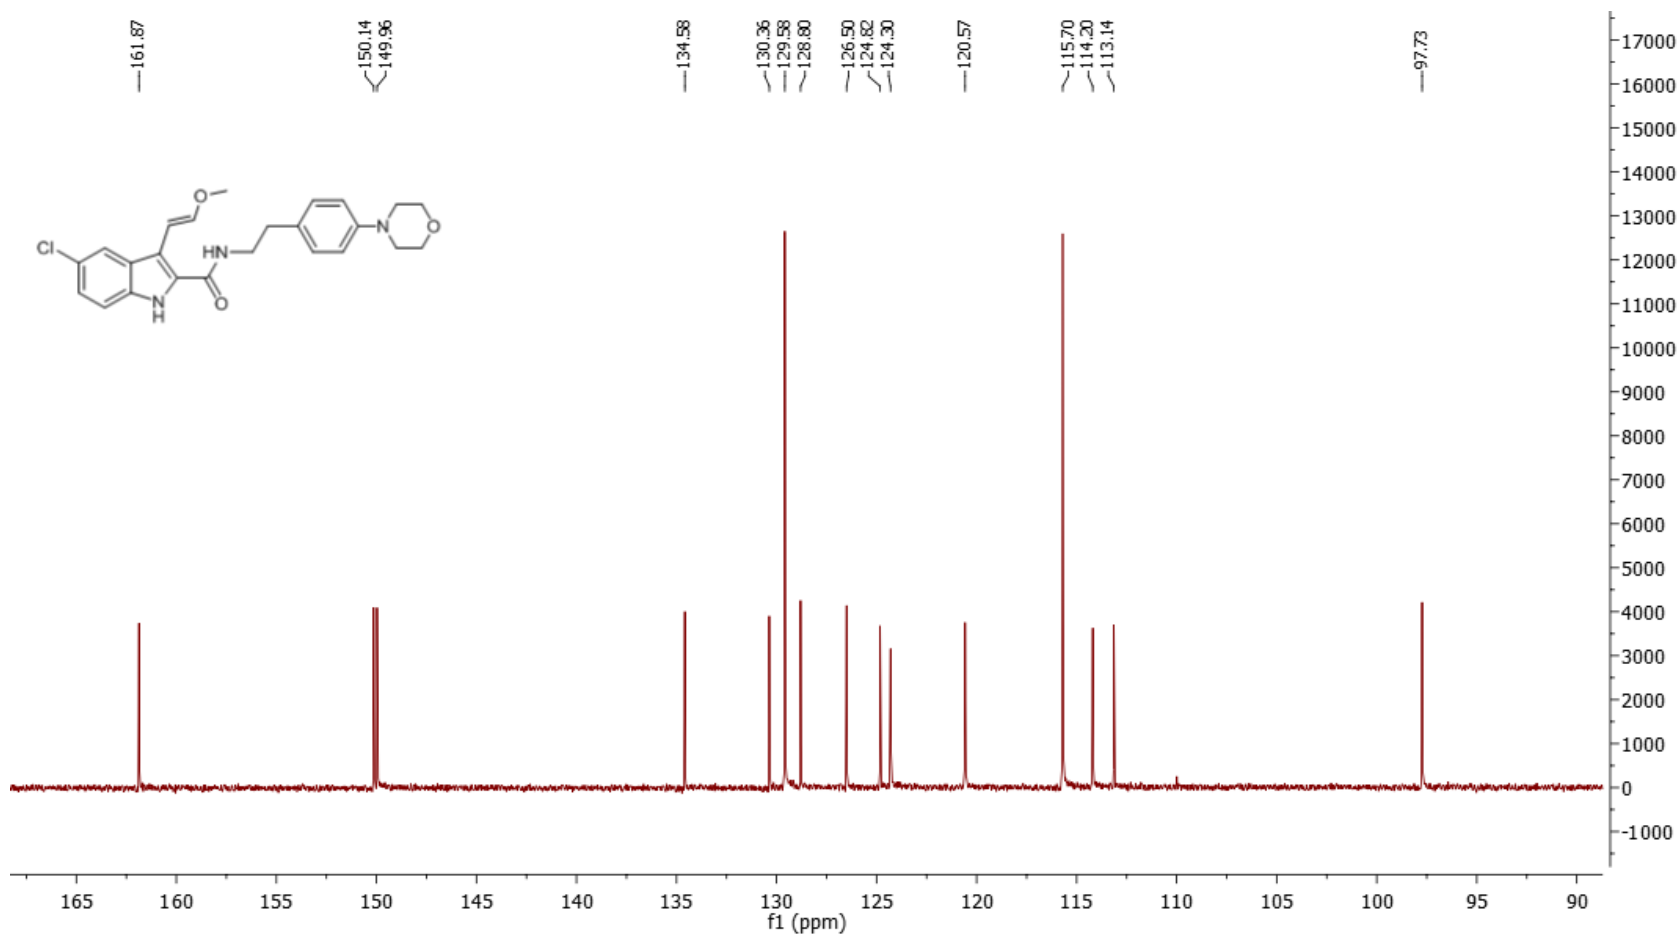

$^{13}\text{C}$  NMR (101 MHz, dms $\text{o}$ )  $\delta$  161.87, 150.14, 149.96, 134.58, 130.36, 129.58, 128.80, 126.50, 124.82, 124.30, 120.57, 115.70, 114.20, 113.14, 97.73, 66.57, 56.68, 49.13, 41.26, 34.63.

# $^1\text{H}$ NMR Spectrum of 7a

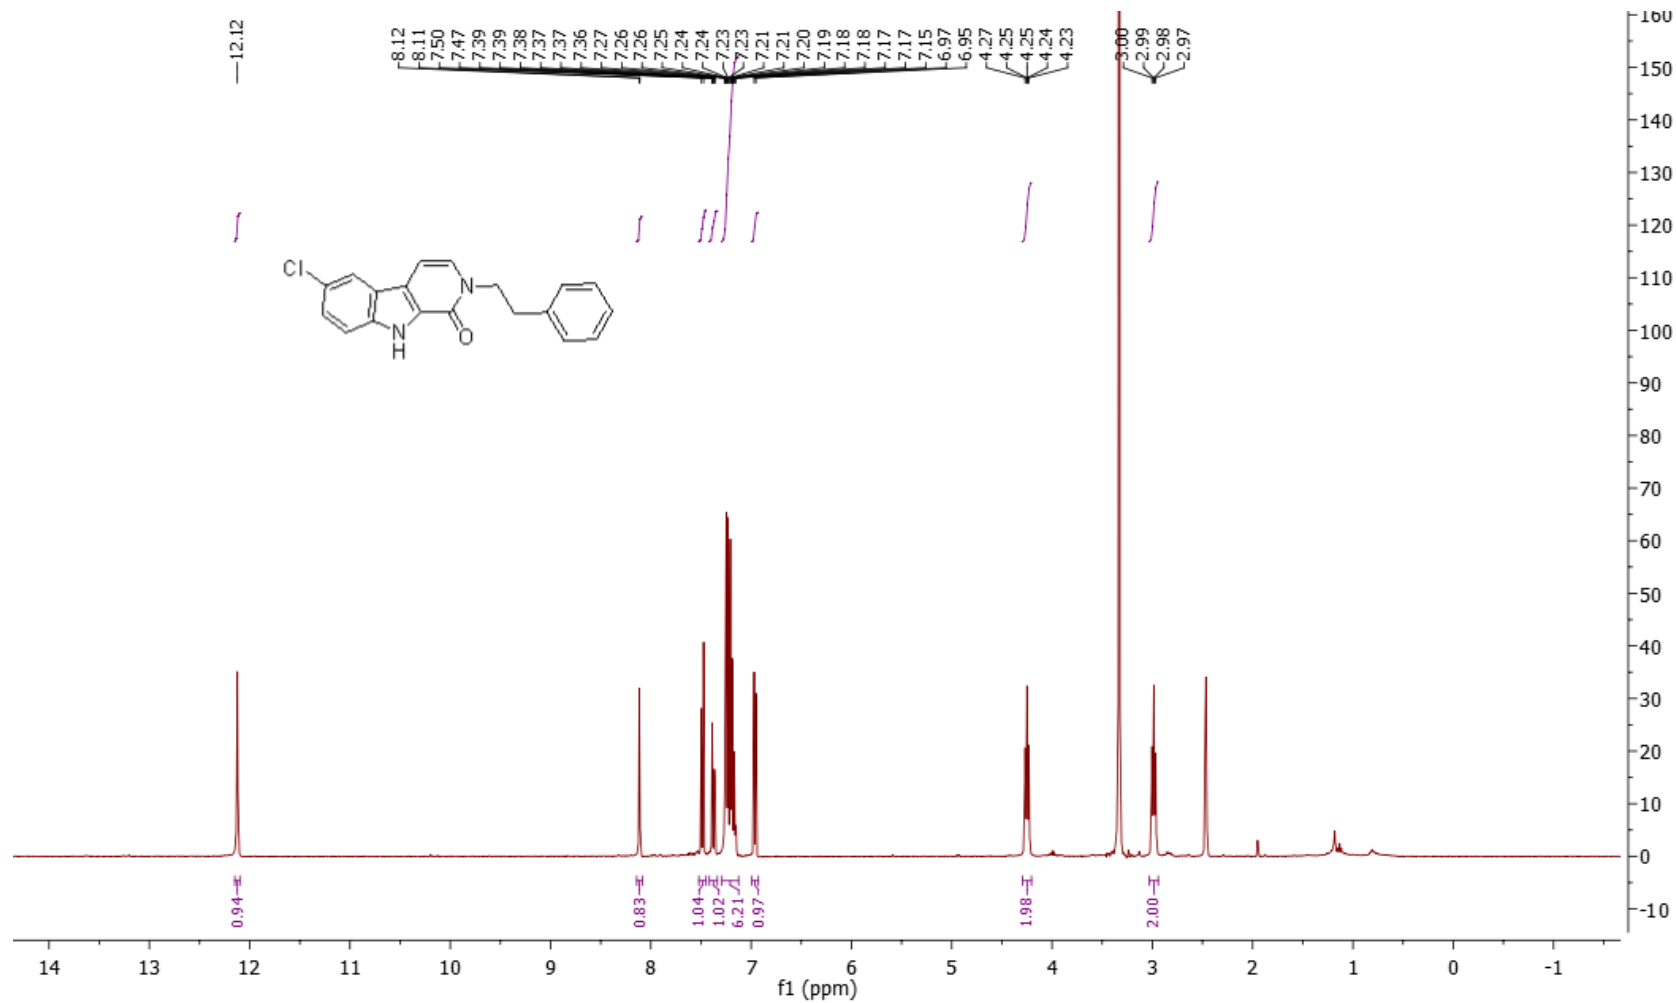

$^1\text{H}$  NMR (400 MHz,  $\text{DMSO-}d_6$ )  $\delta$  12.12 (s, 1H), 8.11 (d,  $J = 2.1$  Hz, 1H), 7.49 (d,  $J = 8.7$  Hz, 1H), 7.38 (dd,  $J = 8.8, 2.1$  Hz, 1H), 7.29 – 7.12 (m, 6H), 6.96 (d,  $J = 7.0$  Hz, 1H), 4.25 (t,  $J = 7.3$  Hz, 2H), 2.99 (t,  $J = 7.3$  Hz, 2H).

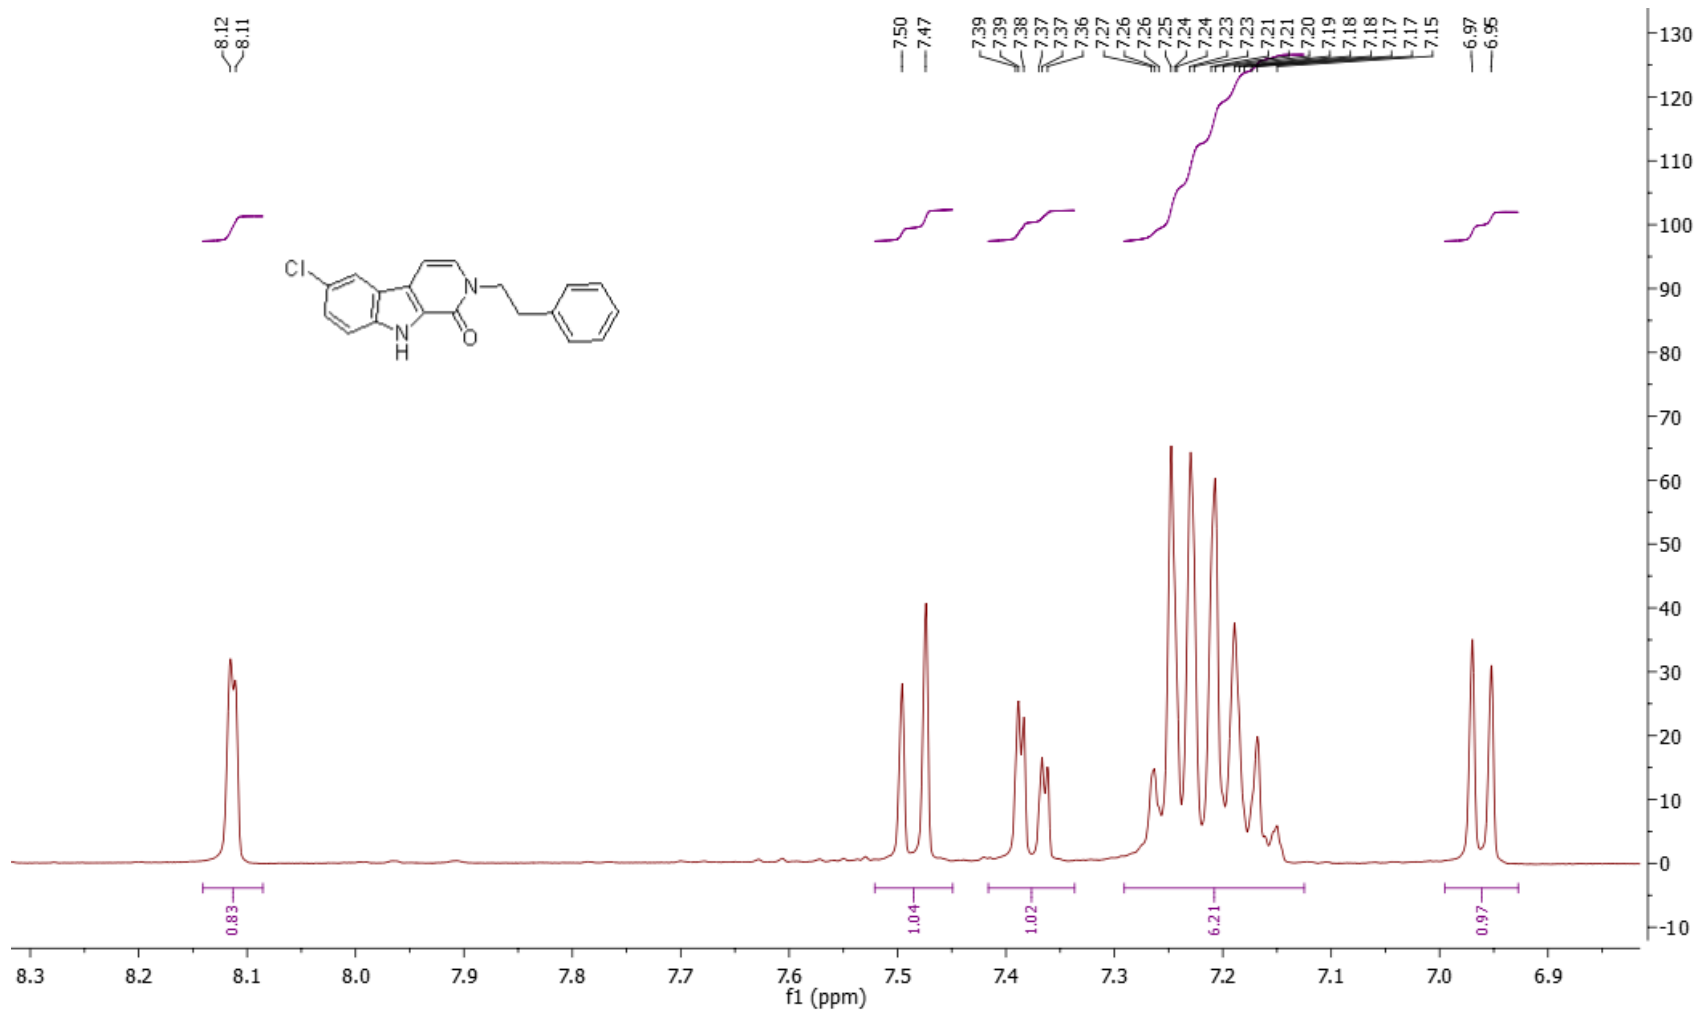

<sup>1</sup>H NMR (400 MHz, DMSO-*d*<sub>6</sub>) δ 12.12 (s, 1H), 8.11 (d, *J* = 2.1 Hz, 1H), 7.49 (d, *J* = 8.7 Hz, 1H), 7.38 (dd, *J* = 8.8, 2.1 Hz, 1H), 7.29 – 7.12 (m, 6H), 6.96 (d, *J* = 7.0 Hz, 1H), 4.25 (t, *J* = 7.3 Hz, 2H), 2.99 (t, *J* = 7.3 Hz, 2H).

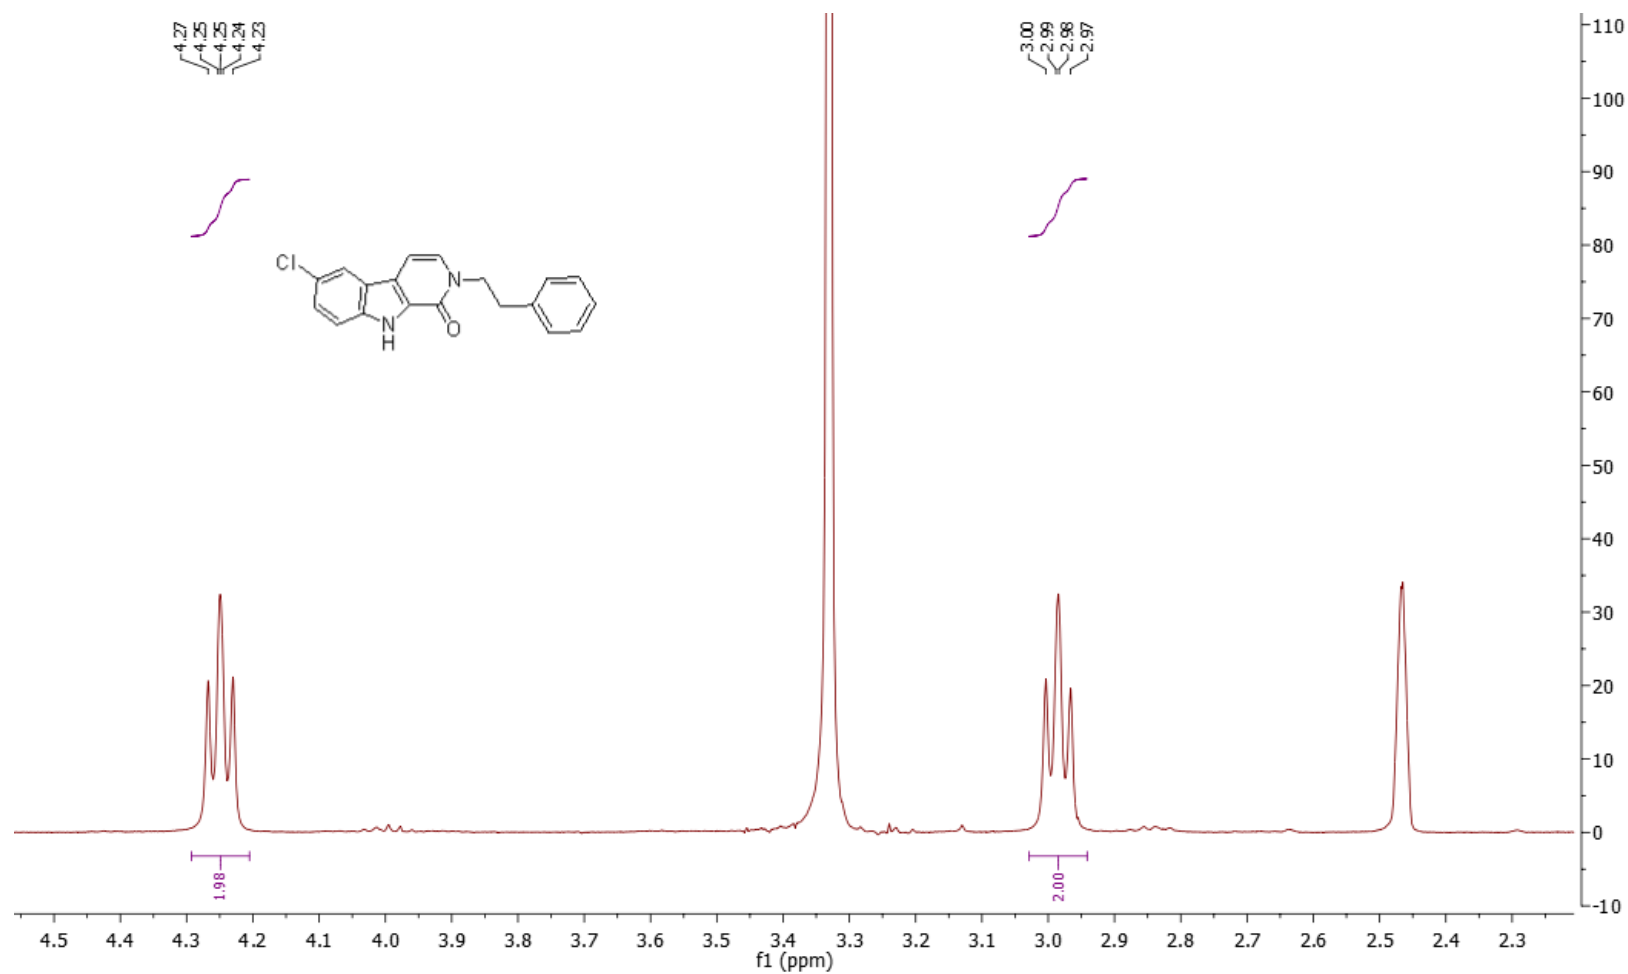

$^1\text{H NMR}$  (400 MHz,  $\text{DMSO-}d_6$ )  $\delta$  12.12 (s, 1H), 8.11 (d,  $J = 2.1$  Hz, 1H), 7.49 (d,  $J = 8.7$  Hz, 1H), 7.38 (dd,  $J = 8.8, 2.1$  Hz, 1H), 7.29 – 7.12 (m, 6H), 6.96 (d,  $J = 7.0$  Hz, 1H), 4.25 (t,  $J = 7.3$  Hz, 2H), 2.99 (t,  $J = 7.3$  Hz, 2H).

# $^{13}\text{C}$ NMR Spectrum of 7a

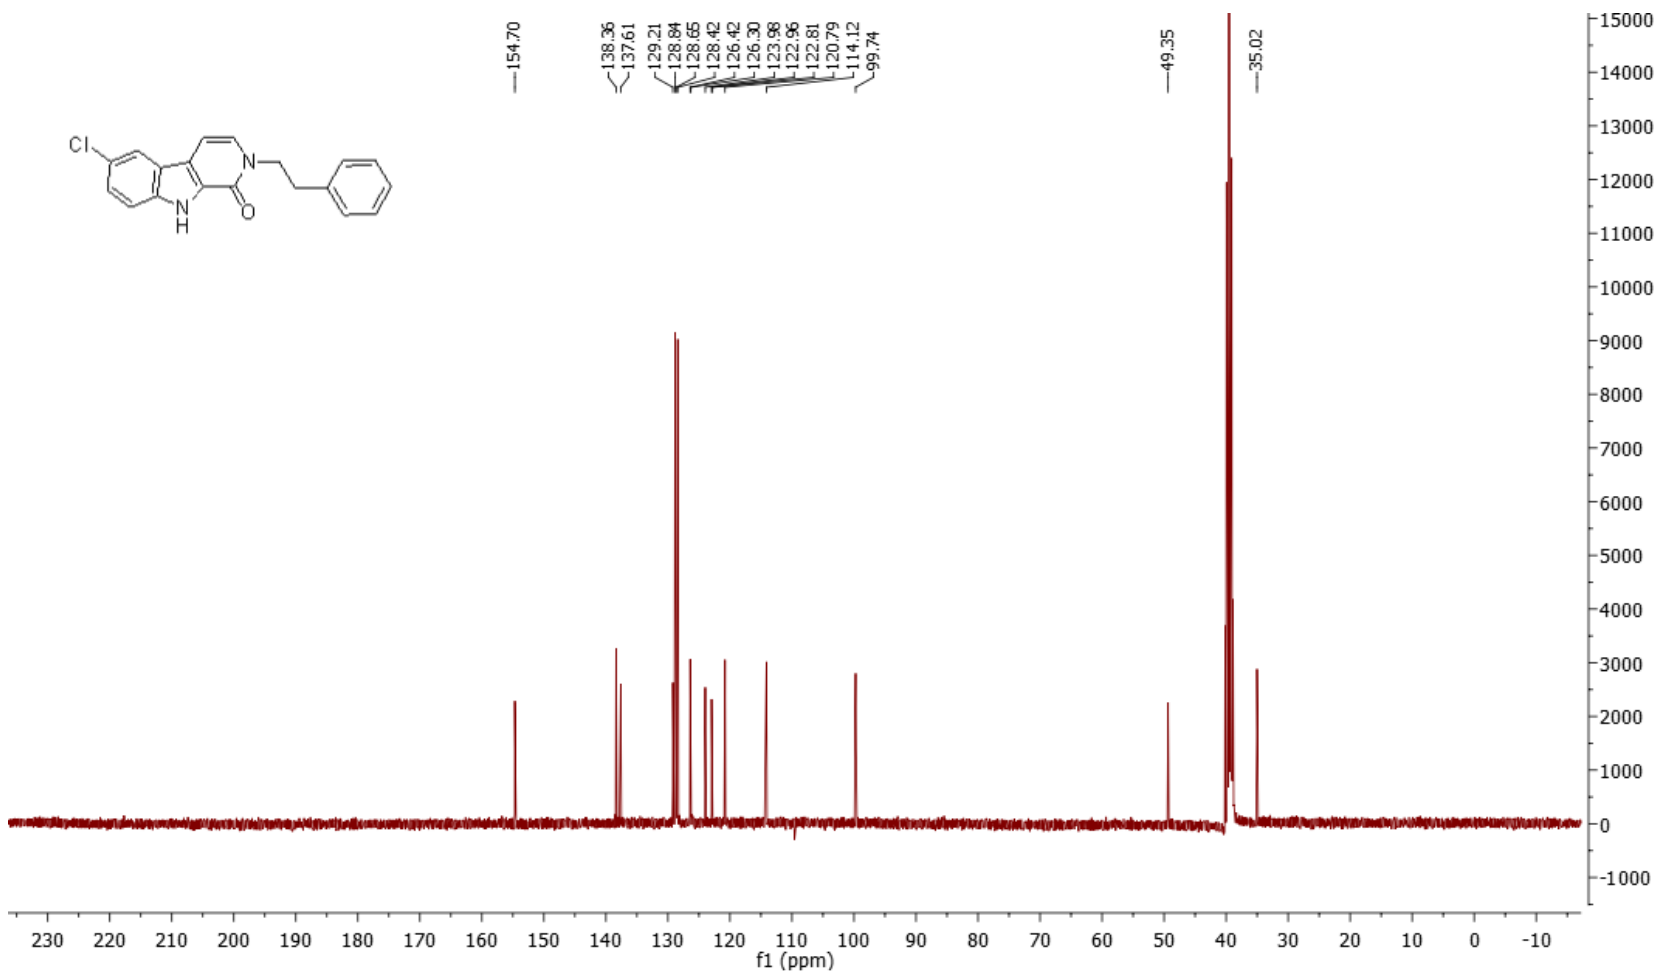

$^{13}\text{C}$  NMR (101 MHz, dmso)  $\delta$  154.70, 138.36, 137.61, 129.21, 128.84, 128.65, 128.42, 126.42, 126.30, 123.98, 122.96, 122.81, 120.79, 114.12, 99.74, 49.35, 35.02.



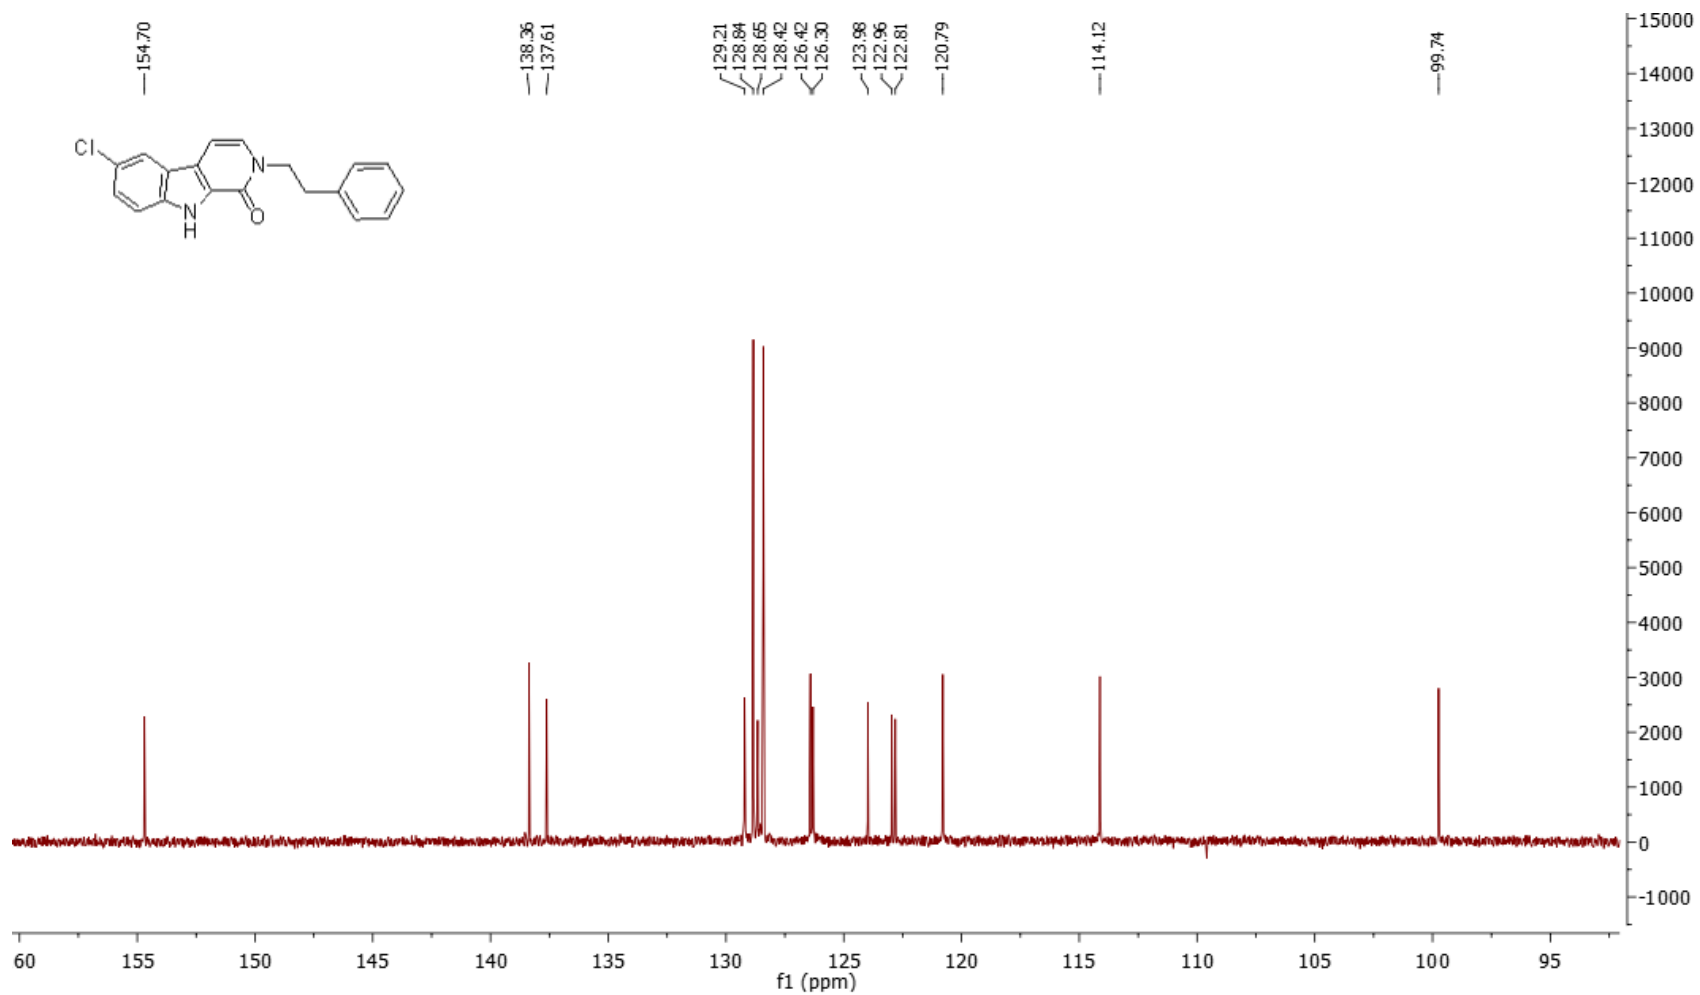

$^{13}\text{C}$  NMR (101 MHz, dmsO)  $\delta$  154.70, 138.36, 137.61, 129.21, 128.84, 128.65, 128.42, 126.42, 126.30, 123.98, 122.96, 122.81, 120.79, 114.12, 99.74, 49.35, 35.02.

# <sup>1</sup>H NMR Spectrum of 7b

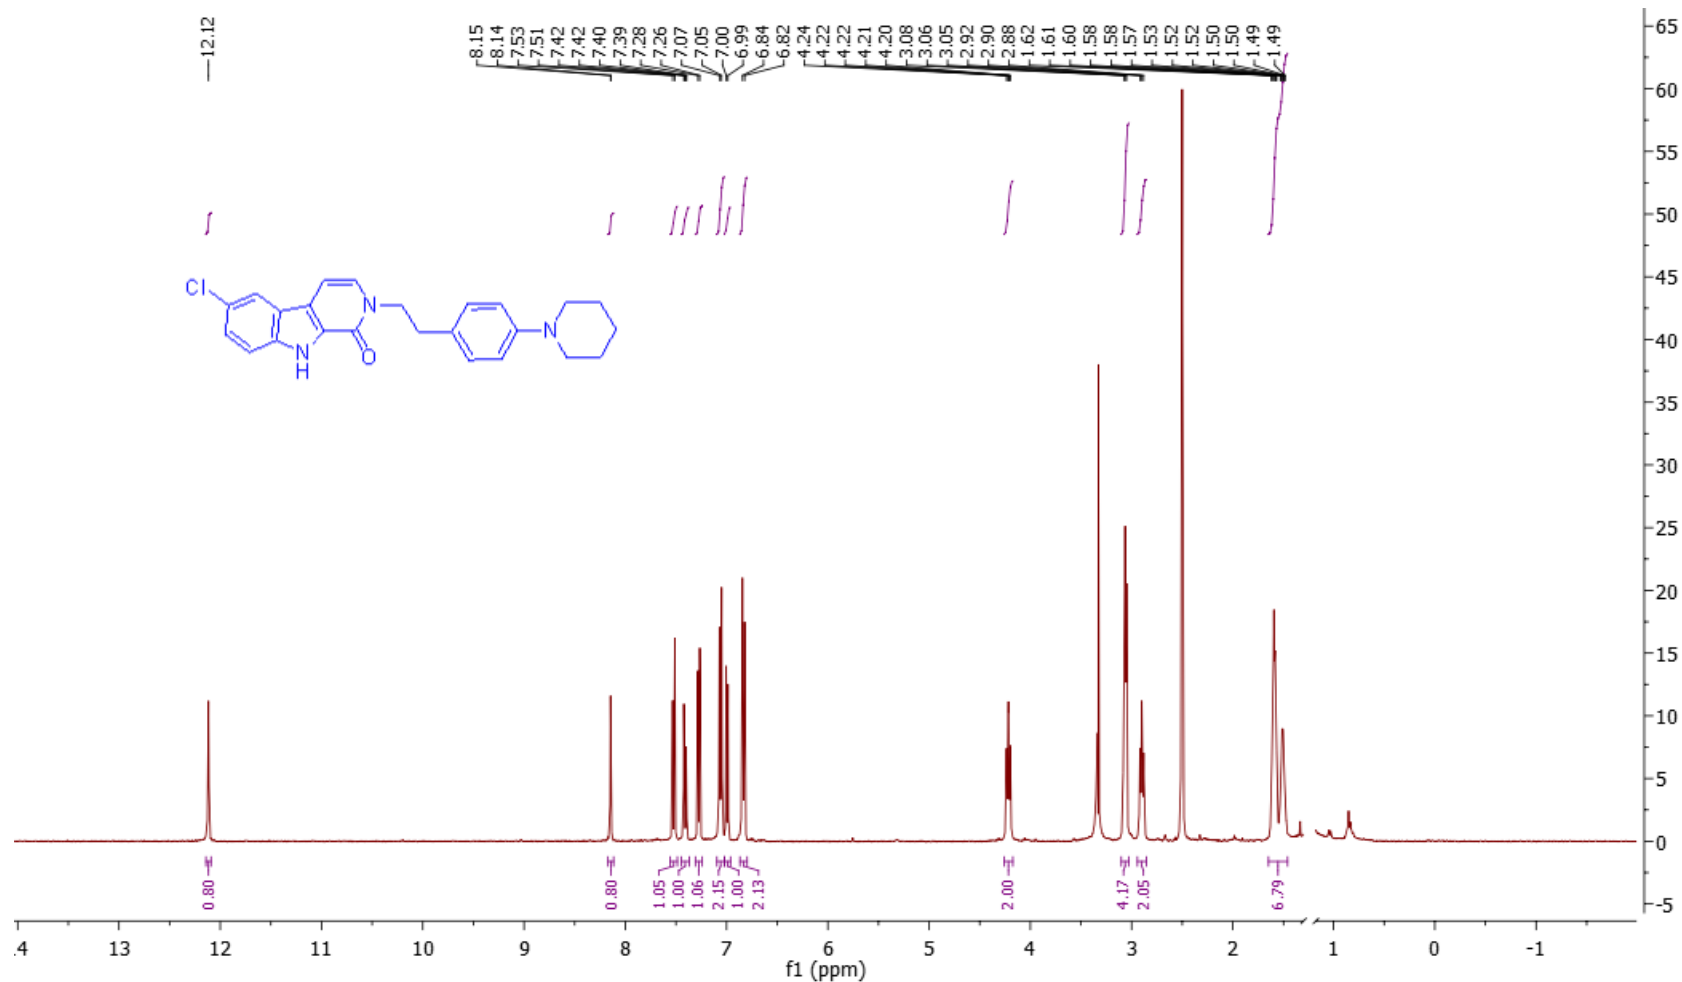

<sup>1</sup>H NMR (400 MHz, DMSO-*d*<sub>6</sub>) δ 12.12 (s, 1H), 8.14 (d, *J* = 2.1 Hz, 1H), 7.52 (d, *J* = 8.7 Hz, 1H), 7.41 (dd, *J* = 8.8, 2.1 Hz, 1H), 7.27 (d, *J* = 7.0 Hz, 1H), 7.06 (d, *J* = 8.5 Hz, 2H), 6.99 (d, *J* = 7.0 Hz, 1H), 6.83 (d, *J* = 8.6 Hz, 2H), 4.22 (t, *J* = 7.5 Hz, 2H), 3.10 – 3.03 (m, 4H), 2.90 (t, *J* = 7.5 Hz, 2H), 1.65 – 1.46 (m, 6H).

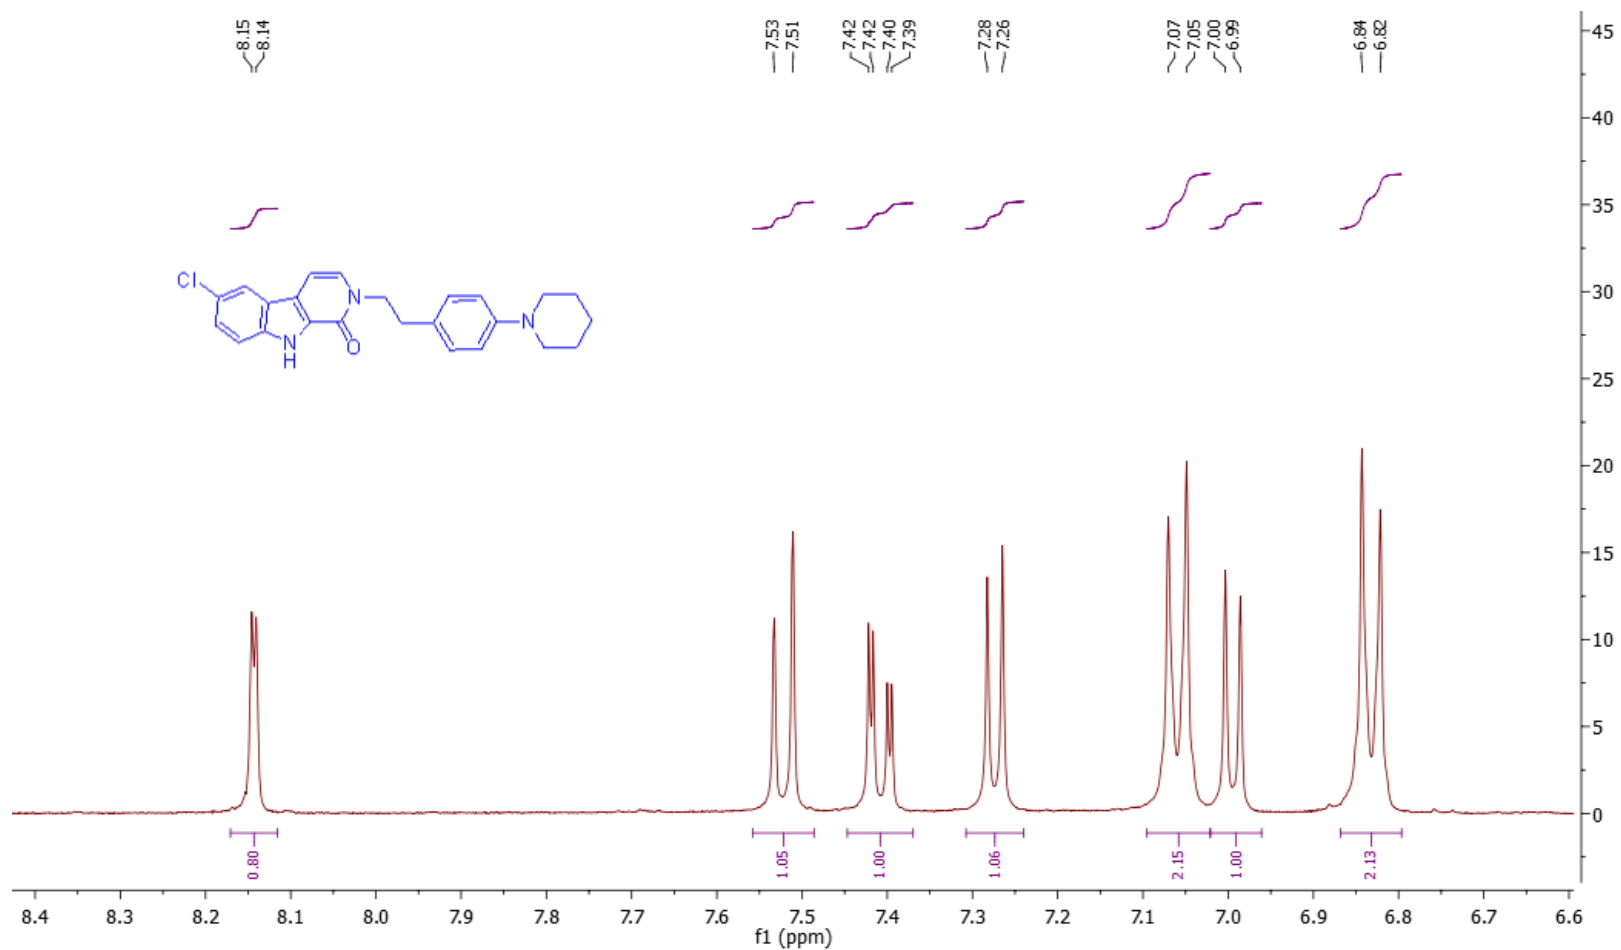

<sup>1</sup>H NMR (400 MHz, DMSO-*d*<sub>6</sub>) δ 12.12 (s, 1H), 8.14 (d, *J* = 2.1 Hz, 1H), 7.52 (d, *J* = 8.7 Hz, 1H), 7.41 (dd, *J* = 8.8, 2.1 Hz, 1H), 7.27 (d, *J* = 7.0 Hz, 1H), 7.06 (d, *J* = 8.5 Hz, 2H), 6.99 (d, *J* = 7.0 Hz, 1H), 6.83 (d, *J* = 8.6 Hz, 2H), 4.22 (t, *J* = 7.5 Hz, 2H), 3.10 – 3.03 (m, 4H), 2.90 (t, *J* = 7.5 Hz, 2H), 1.65 – 1.46 (m, 6H).

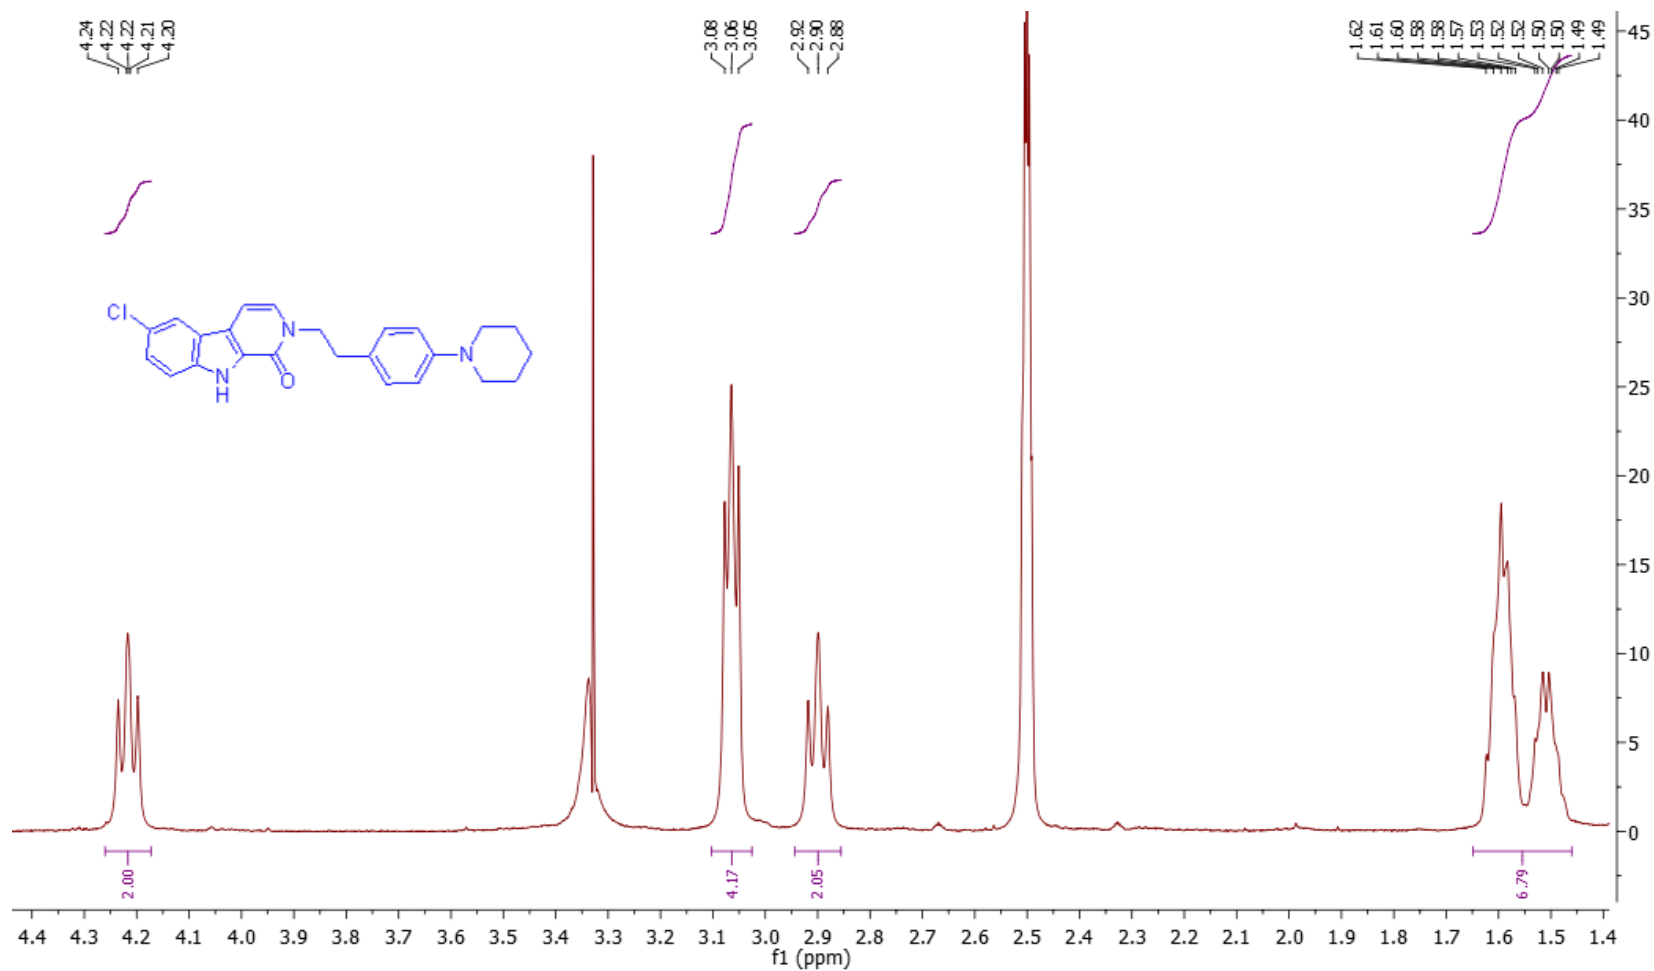

<sup>1</sup>H NMR (400 MHz, DMSO-*d*<sub>6</sub>) δ 12.12 (s, 1H), 8.14 (d, *J* = 2.1 Hz, 1H), 7.52 (d, *J* = 8.7 Hz, 1H), 7.41 (dd, *J* = 8.8, 2.1 Hz, 1H), 7.27 (d, *J* = 7.0 Hz, 1H), 7.06 (d, *J* = 8.5 Hz, 2H), 6.99 (d, *J* = 7.0 Hz, 1H), 6.83 (d, *J* = 8.6 Hz, 2H), 4.22 (t, *J* = 7.5 Hz, 2H), 3.10 – 3.03 (m, 4H), 2.90 (t, *J* = 7.5 Hz, 2H), 1.65 – 1.46 (m, 6H).

# $^{13}\text{C}$ NMR spectrum of **7b**

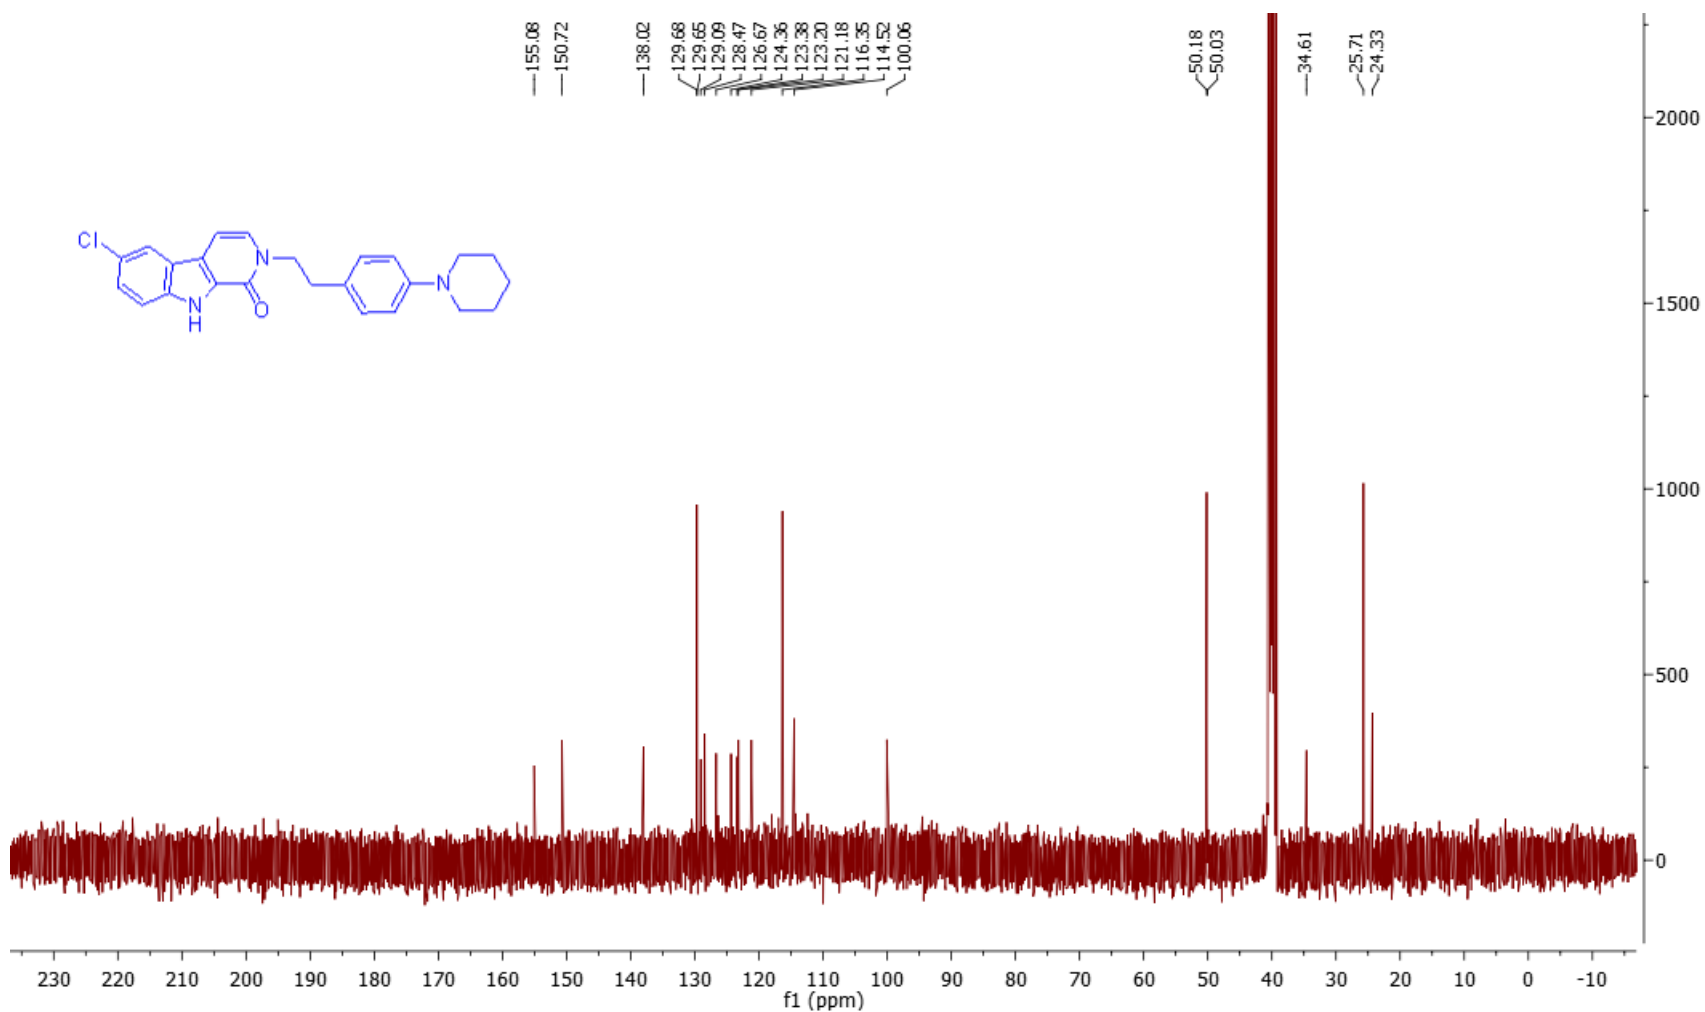

$^{13}\text{C}$  NMR (101 MHz, dmsO)  $\delta$  155.08, 150.72, 138.02, 129.68, 129.65, 129.09, 128.47, 126.67, 124.36, 123.38, 123.20, 121.18, 116.35, 114.52, 100.06, 50.18, 50.03, 34.61, 25.71, 24.33.

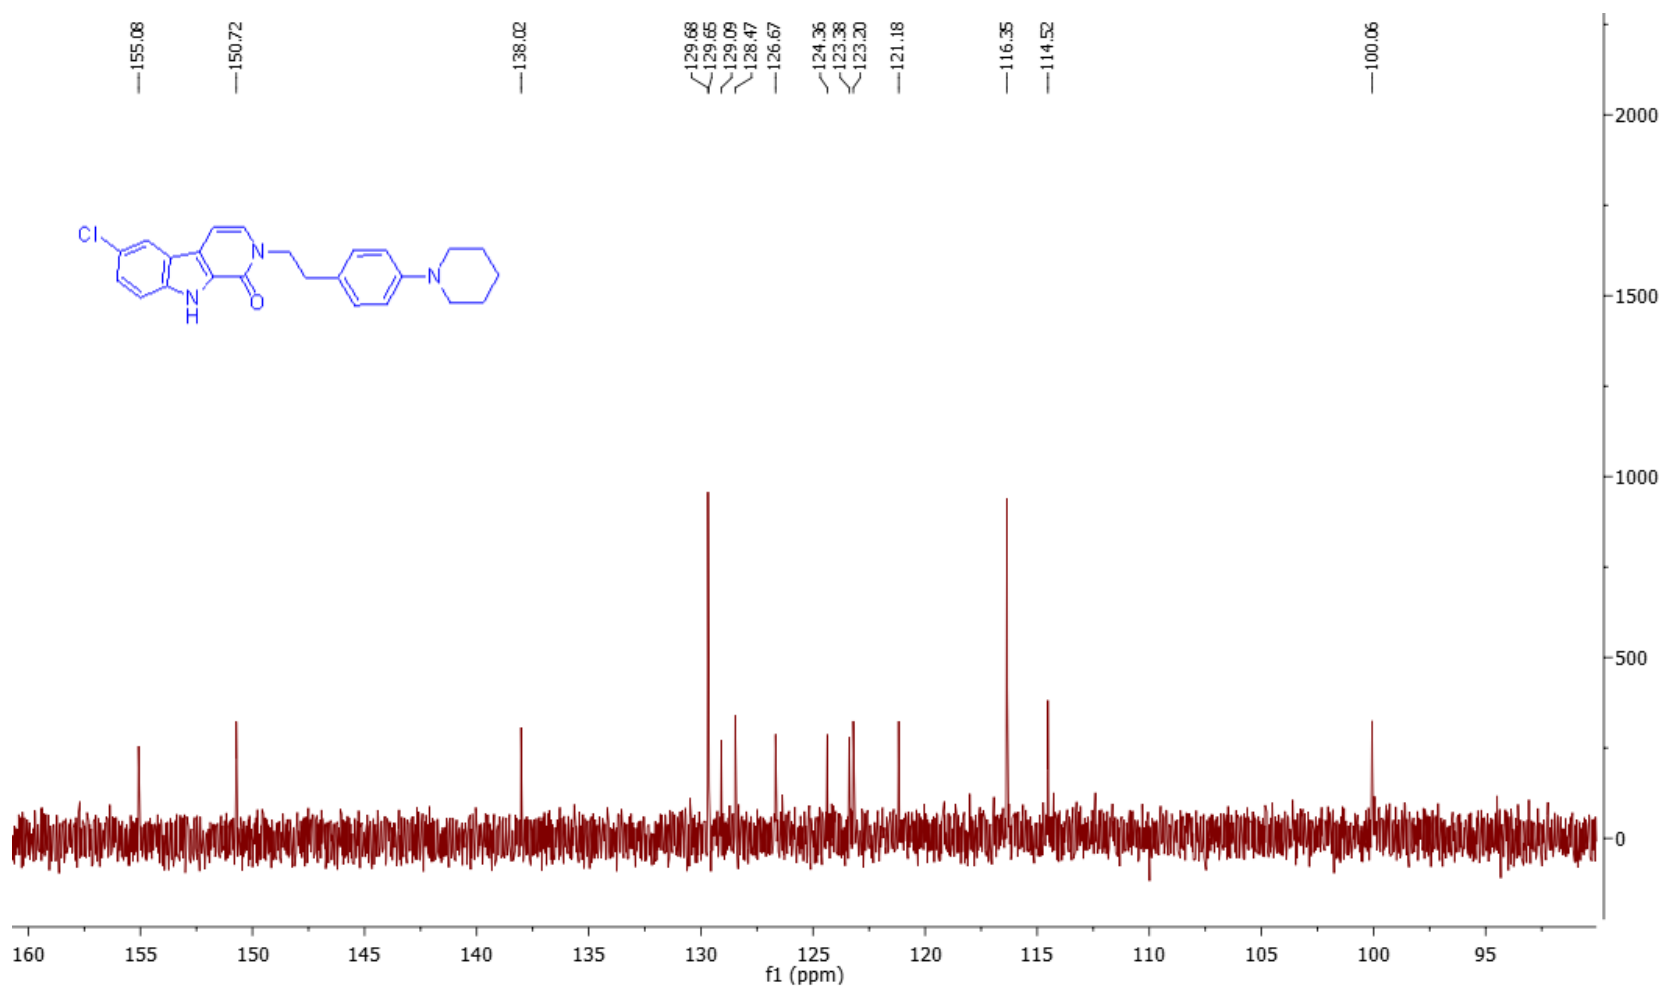

$^{13}\text{C}$  NMR (101 MHz, dmsO)  $\delta$  155.08, 150.72, 138.02, 129.68, 129.65, 129.09, 128.47, 126.67, 124.36, 123.38, 123.20, 121.18, 116.35, 114.52, 100.06, 50.18, 50.03, 34.61, 25.71, 24.33.

### Supplementary material:

**S1:** 3D binding mode of the redocked ligand (erlotinib) (purple) into the active site of EGFR<sup>WT</sup> (PDB: 1M17) overlaid with the co-crystallized ligand (cyan), *RMSD* = 1.39 Å.

**S2:** 3D binding mode of the redocked ligand (6HJ) (purple) into the active site of EGFR<sup>T790M</sup> (PDB: 5J9Z) overlaid with the co-crystallized ligand (cyan), *RMSD* = 0.88 Å.

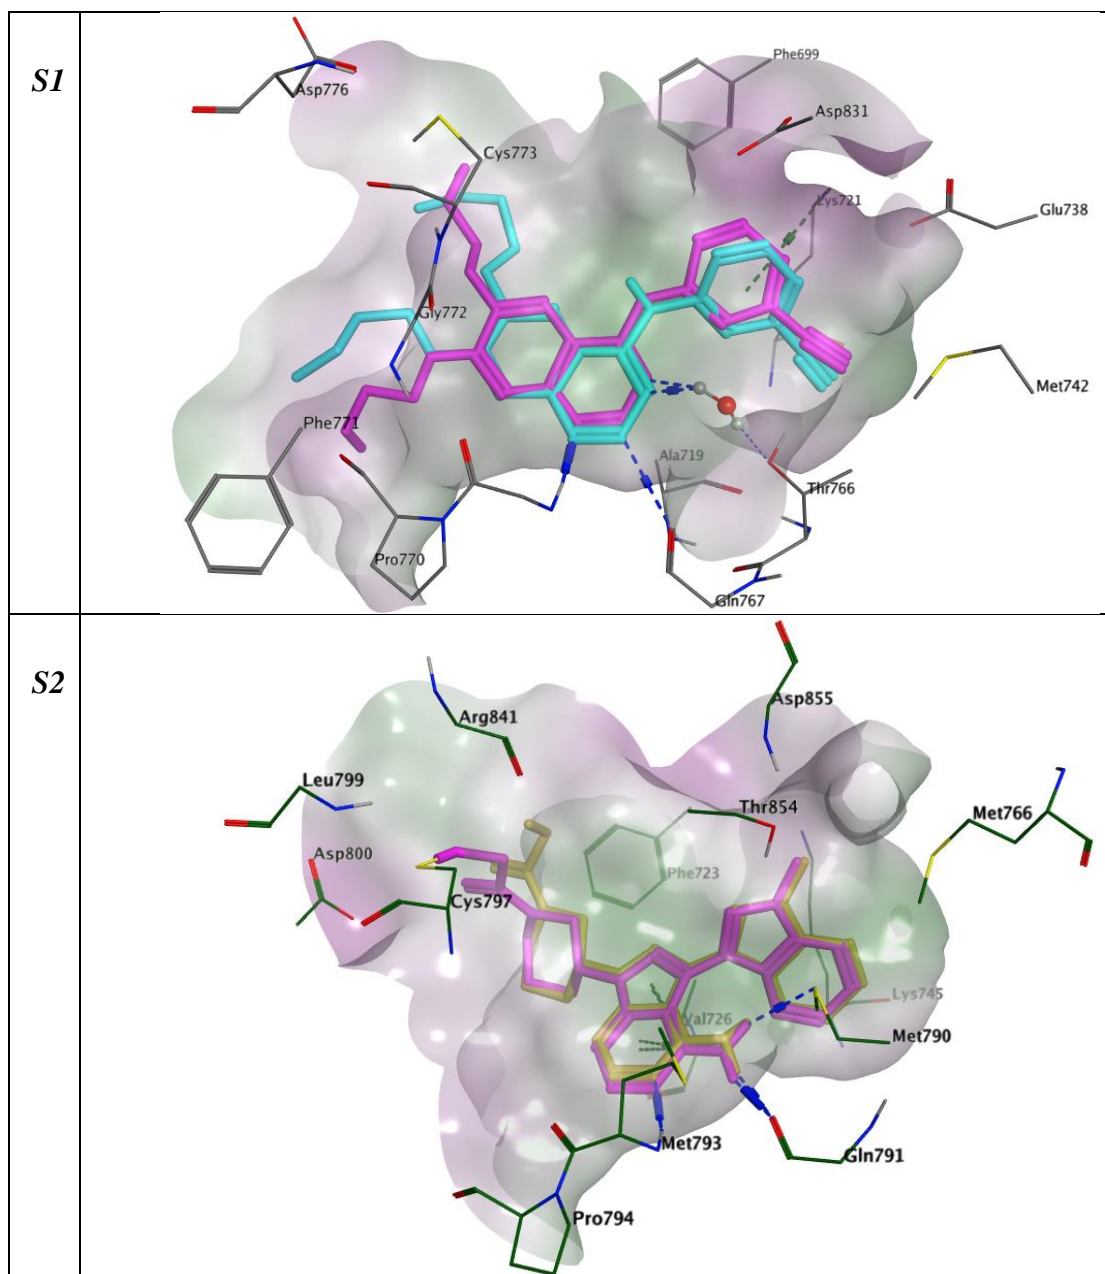

## **Appendix A**

### **Experimental procedures**

#### **General Details**

All the chemicals used were of analytical grade and purified by standard methods prior to use. Silica gel column chromatography was carried out using kieselgel 60 (Merck). TLC analysis was performed on aluminium-backed plates coated with silica gel 60 F<sub>254</sub> (Merck). Melting points were determined using a Gallen Kamp melting point apparatus and are uncorrected. Components were visualized using potassium permanganate solution and UV light. NMR Spectra were taken using a Varian Unity INOVA 400 MHz and Bruker AC250 MHz spectrometers for proton and carbon at university of Aberdeen. All numbers referring to NMR data obtained are in parts per million (ppm). High resolution mass spectrometric data were obtained using Thermo Instruments MS system (LTQ XL/LTQ Orbitrap Discovery) coupled to a Thermo Instruments HPLC system (Accela PDA detector, Accela PDA autosampler and Pump) at university of Aberdeen

#### **4.2. Biological evaluation**

##### **4.2.1. Cytotoxic activity using MTT Assay and evaluation of IC<sub>50</sub>**

###### **4.2.1.1. MTT assay**

MTT assay was performed to investigate the effect of the synthesized compounds on mammary epithelial cells (MCF-10A). The cells were propagated in medium consisting of Ham's F-12 medium/ Dulbecco's modified Eagle's medium (DMEM) (1:1) supplemented with 10% foetal calf serum, 2 mM glutamine, insulin (10 µg/mL), hydrocortisone (500 ng/mL) and epidermal growth factor (20 ng/mL). Trypsin



ethylenediamine tetra acetic acid (EDTA) was used to passage the cells after every 2-3 days. 96-well flat-bottomed cell culture plates were used to seed the cells at a density of  $10^4$  cells mL<sup>-1</sup>. The medium was aspirated from all the wells of culture plates after 24 h followed by the addition of synthesized compounds (in 200  $\mu$ L medium to yield a final concentration of 0.1% (v/v) dimethylsulfoxide) into individual wells of the plates. Four wells were designated to a single compound. The plates were allowed to incubate at 37°C for 96 h. Afterwards, the medium was aspirated and 3-[4,5-dimethylthiazol-2-yl]-2,5-diphenyltetrazolium bromide (MTT) (0.4 mg/mL) in medium was added to each well and subsequently incubated for 3 h. The medium was aspirated and 150  $\mu$ L dimethyl sulfoxide (DMSO) was added to each well. The plates were vortexed followed by the measurement of absorbance at 540 nm on a microplate reader. The results were presented as inhibition (%) of proliferation in contrast to controls comprising 0.1% DMSO.

#### **4.2.1.2. Assay for antiproliferative effect**

To explore the antiproliferative potential of compounds propidium iodide fluorescence assay was performed using different cell lines such as Panc-1 (pancreas cancer cell line), MCF-7 (breast cancer cell line), HT-29 (colon cancer cell line) and A-549 (epithelial cancer cell line), respectively. To calculate the total nuclear DNA, a fluorescent dye (propidium iodide, PI) is used which can attach to the DNA, thus offering a quick and precise technique. PI cannot pass through the cell membrane and its signal intensity can be considered as directly proportional to quantity of cellular DNA. Cells whose cell membranes are damaged or have changed permeability are counted as dead ones. The assay was performed by seeding the cells of different cell lines at a density of 3000-7500 cells/well (in 200  $\mu$ L medium) in culture plates followed by incubation for 24h at 37 °C in humidified 5%CO<sub>2</sub>/95% air atmospheric conditions.

The medium was removed; the compounds were added to the plates at 10  $\mu$ M concentrations (in 0.1% DMSO) in triplicates, followed by incubation for 48h. DMSO (0.1%) was used as control. After incubation, medium was removed followed by the addition of PI (25  $\mu$ l, 50 $\mu$ g/mL in water/medium) to each well of the plates. At -80  $^{\circ}$ C, the plates were allowed to freeze for 24 h, followed by thawing at 25 $^{\circ}$ C. A fluorometer (Polar-Star BMG Tech) was used to record the readings at excitation and emission wavelengths of 530 and 620 nm for each well. The percentage cytotoxicity of compounds was calculated using the following formula:

$$\% \text{ Cytotoxicity} = \frac{A_C - A_{TC}}{A_C} \times 100$$

Where  $A_{TC}$ = Absorbance of treated cells and  $A_C$ = Absorbance of control. Erlotinib was used as positive control in the assay.

#### **4.2.2. EGFR inhibitory assay**

Baculoviral expression vectors including pBlueBacHis2B and pFASTBacHTc were used separately to clone 1.6 kb cDNA coding for EGFR cytoplasmic domain (EGFR-CD, amino acids 645–1186). 5' upstream to the EGFR sequence comprised a sequence that encoded (His)<sub>6</sub>. Sf-9 cells were infected for 72h for protein expression. The pellets of Sf-9 cells were solubilized in a buffer containing sodium vanadate (100  $\mu$ M), aprotinin (10  $\mu$ g/mL), triton (1%), HEPES buffer(50mM), ammonium molybdate (10  $\mu$ M), benzamidine HCl (16  $\mu$ g/mL), NaCl (10 mM), leupeptin (10  $\mu$ g/mL) and pepstatin (10  $\mu$ g/mL) at 0 $^{\circ}$ C for 20 min at pH 7.4, followed by centrifugation for 20 min. To eliminate the nonspecifically bound material, a Ni-NTA super flow packed column was used to pass through and wash the crude extract supernatant first with 10mM and then with 100 mM imidazole. Histidine-linked proteins were first eluted with 250 and then

with 500 mM imidazole subsequent to dialysis against NaCl (50 mM), HEPES (20 mM), glycerol (10%) and 1 µg/mL each of aprotinin, leupeptin and pepstatin for 120 min. The purification was performed either at 4 °C or on ice. To record autophosphorylation level, EGFR kinase assay was carried out on the basis of DELFIA/Time-Resolved Fluorometry. The compounds were first dissolved in DMSO absolute, subsequent to dilution to appropriate concentration using HEPES (25 mM) at pH 7.4. Each compound (10 µL) was incubated with recombinant enzyme (10 µL, 5 ng for EGFR, 1:80 dilution in 100 mM HEPES) for 10 min at 25°C, subsequent to the addition of 5X buffer (10 µL, containing 2 mM MnCl<sub>2</sub>, 100 µM Na<sub>3</sub>VO<sub>4</sub>, 20 mM HEPES and 1 mM DTT) and ATP-MgCl<sub>2</sub> (20 µL, containing 0.1 mM ATP and 50 mM MgCl<sub>2</sub>) and incubation for 1h. The negative and positive controls were included in each plate by the incubation of enzyme either with or without ATP-MgCl<sub>2</sub>. The liquid was removed after incubation and the plates were washed thrice using wash buffer. Europium-tagged antiphosphotyrosine antibody (75 µL, 400 ng) was added to each well followed by incubation of 1h and then washing of the plates using buffer. The enhancement solution was added to each well and the signal was recorded at excitation and emission wavelengths of 340 at 615 nm. The autophosphorylation percentage inhibition by compounds was calculated using the following equation:

$$100\% - [(negative\ control)/(positive\ control) - (negative\ control)]$$

Using the curves of percentage inhibition of eight concentrations of each compound, IC<sub>50</sub> was calculated. Majority of signals detected by antiphosphotyrosine antibody were from EGFR because the enzyme preparation contained low impurities.

### **EGFR<sup>T790M</sup> inhibitory assay**

The EGFR protein (EGFR<sup>T790M</sup>) was purchased from Carna Bioscience. The HTRF KinEASE-TK kit (Cat#62TK0PEB) was from Cisbio. All the other chemicals were from Sigma. The EGFR kinase assays were performed in 384-well plate (Corning 3676, low volume, black, NBS), using Cisbio HTRF KinEASE-TK kit. The assay buffer contained 50 mM HEPES (pH 7.0), 0.02% NaN<sub>3</sub>, 0.01% BSA, 0.1 mM Orthovanadate, 10 mM MgCl<sub>2</sub>, 2.5 mM DTT and 6.25 nM SEB. EGFR kinases were first incubated with compounds for 2 h respectively, then ATP/Peptide substrate mixture was added to initiate the reaction. After 30 min reaction at room temperature, the detection reagents were added. The TR-FRET signal was measured on PerkinElmer Envision using excitation 320 nm and emission 615 nm/665 nm. The data was analyzed using Graph Pad Prism (Version 6.0) software after three parallel experiments.

### **4.2.3. Caspase-3 activation assay**

Allow all reagents to reach room temperature before use. Gently mix all liquid reagents prior to use. Determine the number of 8-well strips needed for the assay. Insert these in the frame(s) for current use. Add 100 µl of the *Standard Diluent Buffer* to the zero standard wells. Well(s) reserved for chromogen blank should be left empty. Add 100 µl of standards and controls or diluted samples to the appropriate microtiter wells. The sample dilution chosen should be optimized for each experimental system. Tap gently on side of plate to mix. Cover wells with *plate cover* and incubate for 2 hours at room temperature. Thoroughly aspirate or decant solution from wells and discard the liquid, Wash wells 4 times. Pipette 100 µl of *Caspase-3 (Active) Detection Antibody* solution into each well except the chromogen blank(s). Tap gently on the side of the plate to mix. Cover plate with *plate cover* and incubate for 1 hour at room temperature. Thoroughly aspirate or decant solution from wells and discard the liquid, Wash wells 4

times. Add 100  $\mu$ l Anti-Rabbit IgG HRP Working Solution to each well except the chromogen blank(s). Prepare the working dilution as described in Preparing IgG HRP. Cover wells with the *plate cover* and incubate for 30 minutes at room temperature. Thoroughly aspirate or decant solution from wells and discard the liquid. Wash wells 4 times. Add 100  $\mu$ l of *Stabilized Chromogen* to each well. The liquid in the wells will begin to turn blue. Incubate for 30 minutes at room temperature and in the dark. The incubation time for chromogen substrate is often determined by the microtiter plate reader used. Many plate readers have the capacity to record a maximum optical density (O.D.) of 2.0. The O.D. values should be monitored, and the substrate reaction stopped before the O.D. of the positive wells exceeds the limits of the instrument. The O.D. values at 450 nm can only be read after the *Stop Solution* has been added to each well. If using a reader that records only to 2.0 O.D., stopping the assay after 20 to 25 minutes is suggested. Add 100  $\mu$ l of *Stop Solution* to each well. Tap side of plate gently to mix. The solution in the wells should change from blue to yellow. Read the absorbance of each well at 450 nm having blanked the plate reader against a chromogen blank composed of 100  $\mu$ l each of *Stabilized Chromogen* and *Stop Solution*. Read the plate within 2 hours after adding the *Stop Solution*. Use a curve fitting software to generate the standard curve. A four-parameter algorithm provides the best standard curve fit. Read the concentrations for unknown samples and controls from the standard curve. Multiply value(s) obtained for sample(s) by the appropriate dilution factor to correct for the dilution in step 3. Samples producing signals greater than that of the highest standard should be diluted in *Standard Diluent Buffer* and reanalyzed.

#### **4.2.4. Caspase-8 activation assay**

Cells were obtained from American Type Culture Collection, cells were grown in RPMI 1640 containing 10% fetal bovine serum at 37°C, stimulated with the compounds to be

tested for caspase8, and lysed with Cell Extraction Buffer. This lysate was diluted in Standard Diluent Buffer over the range of the assay and measured for human active caspase-8 content. (*Cells are Plated in a density of  $1.2 - 1.8 \times 10,000$  cells/well in a volume of 100 $\mu$ l complete growth medium + 100 ul of the tested compound per well in a 96-well plate for 24 hours before the enzyme assay for Tubulin.*). The absorbance of each microwell was read on a spectro-photometer at 450 nm. A standard curve is prepared from 7 human Caspase-8 standard dilutions and human Caspase-8 concentration determined.

#### **4.2.5. Bax activation assay**

Bring all reagents, except the human Bax- $\alpha$  Standard, to room temperature for at least 30 minutes prior to opening. The human Bax- $\alpha$  Standard solution should not be left at room temperature for more than 10 minutes. All standards, controls and samples should be run in duplicate. Refer to the Assay Layout Sheet to determine the number of wells to be used and put any remaining wells with the desiccant back into the pouch and seal the ziploc. Store unused wells at 4 °C. Pipet 100  $\mu$ L of Assay Buffer into the S0 (0 pg/mL standard) wells. Pipet 100  $\mu$ L of Standards #1 through #6 into the appropriate wells. Pipet 100  $\mu$ L of the Samples into the appropriate wells. Tap the plate gently to mix the contents. Seal the plate and incubate at room temperature on a plate shaker for 1 hour at ~500 rpm. Empty the contents of the wells and wash by adding 400  $\mu$ L of wash solution to every well. Repeat the wash 4 more times for a total of **5 washes**. After the final wash, empty or aspirate the wells and firmly tap the plate on a lint free paper towel to remove any remaining wash buffer. Pipet 100  $\mu$ L of yellow Antibody into each well, except the Blank. Seal the plate and incubate at room temperature on a plate shaker for 1 hour at ~500 rpm. Empty the contents of the wells and wash by adding 400  $\mu$ L of wash solution to every well. Repeat the wash 4 more times for a total of **5**

washes. After the final wash, empty or aspirate the wells and firmly tap the plate on a lint free paper towel to remove any remaining wash buffer. Add 100  $\mu\text{L}$  of blue Conjugate to each well, except the Blank. Seal the plate and incubate at room temperature on a plate shaker for 30 minutes at  $\sim 500$  rpm. Empty the contents of the wells and wash by adding 400  $\mu\text{L}$  of wash solution to every well. Repeat the wash 4 more times for a total of **5 washes**. After the final wash, empty or aspirate the wells and firmly tap the plate on a lint free paper towel to remove any remaining wash buffer. Pipet 100  $\mu\text{L}$  of Substrate Solution into each well. Incubate for 30 minutes at room temperature on a plate shaker at  $\sim 500$  rpm. Pipet 100  $\mu\text{L}$  Stop Solution to each well. Blank the plate reader against the Blank wells, read the optical density at 450 nm. Calculate the average net Optical Density (OD) bound for each standard and sample by subtracting the average Blank OD from the average OD for each standard and sample. Using linear graph paper, plot the Average Net OD for each standard versus Bax concentration in each standard. Approximate a straight line through the points. The concentration of Bax in the unknowns can be determined by interpolation.

#### **4.2.6. Bcl-2inhibition assay**

Mix all reagents thoroughly without foaming before use. Wash the microwells twice with approximately 300  $\mu\text{L}$  Wash Buffer per well with thorough aspiration of microwell contents between washes. Take caution not to scratch the surface of the microwells. After the last wash, empty the wells and tap microwell strips on absorbent pad or paper towel to remove excess Wash Buffer. Use the microwell strips immediately after washing or place upside down on a wet absorbent paper for not longer than 15 minutes. Do not allow wells to dry. Add 100  $\mu\text{L}$  of Sample Diluent in duplicate to all standard wells and to the blank wells. Prepare standard (1:2 dilution) in duplicate ranging from 32 ng/mL to 0.5 ng/mL. Add 100  $\mu\text{L}$  of Sample Diluent, in duplicate, to the blank wells.

Add 80  $\mu\text{L}$  of Sample Diluent, in duplicate, to the sample wells. Add 20  $\mu\text{L}$  of each Sample, in duplicate, to the designated wells. Add 50  $\mu\text{L}$  of diluted biotin-conjugate to all wells, including the blank wells. Cover with a plate cover and incubate at room temperature, on a microplate shaker at 100 rpm if available, for 2 hours. Remove plate cover and empty the wells. Wash microwell strips 3 times as described in step 2. Add 100  $\mu\text{L}$  of diluted Streptavidin-HRP to all wells, including the blank wells. Cover with a plate cover and incubate at room temperature, on a microplate shaker at 100 rpm if available, for 1 hour. Remove plate cover and empty the wells. Wash microwell strips 3 times as described in step 2. Proceed to the next step. Pipette 100  $\mu\text{L}$  of mixed TMB Substrate Solution to all wells, including the blanks. Incubate the microwell strips at room temperature (18° to 25°C) for about 15 minutes, if available on a rotator set at 100 rpm. Avoid direct exposure to intense light. The point, at which the substrate reaction is stopped, is often determined by the ELISA reader. Many ELISA readers record absorbance only up to 2.0 O.D. Therefore, the color development within individual microwells must be watched by the person running the assay and the substrate reaction stopped before positive wells are no longer properly detectable. Stop the enzyme reaction by quickly pipetting 100  $\mu\text{L}$  of Stop Solution into each well, including the blank wells. It is important that the Stop Solution is spread quickly and uniformly throughout the microwells to completely inactivate the enzyme. Results must be read immediately after the Stop Solution is added or within one hour if the microwell strips are stored at 2 - 8°C in the dark. Read absorbance of each microwell on a spectrophotometer using 450 nm as the primary wave length.



### **4.3. Statistical analysis**

Computerized Prism 5 program was used to statistically analyzed data using one-way ANOVA test followed by Tukey's as post ANOVA for multiple comparison at  $P \leq .05$ .

Data were presented as mean  $\pm$  SEM.
